# Molecular Cues to Implantation

S. K. DEY, H. LIM, SANJOY K. DAS, JEFF REESE, B. C. PARIJA, TAKIKO DAIKOKU, AND HAIBIN WANG

*Departments of Pediatrics (S.K.De., S.K.Da., J.R., B.C.P., T.D., H.W.), Cell and Developmental Biology, and Pharmacology (S.K.De.), Vanderbilt University Medical Center, Nashville, Tennessee 37232; and Departments of Obstetrics and Gynecology, and Cell Biology and Physiology (H.L.), Washington University School of Medicine, St. Louis, Missouri 63110*

Successful implantation is the result of reciprocal interactions between the implantation-competent blastocyst and receptive uterus. Although various cellular aspects and molecular pathways of this dialogue have been identified, a comprehensive understanding of the implantation process is still missing. The receptive state of the uterus, which lasts for a limited period, is defined as the time when the uterine environment is conducive to blastocyst acceptance and implantation. A better understanding of the molecular signals that regulate uterine receptivity and implantation competency of the blastocyst is of clinical relevance because unraveling the nature of these signals may lead to strategies to correct implantation failure and improve pregnancy rates. Gene expres-

sion studies and genetically engineered mouse models have provided valuable clues to the implantation process with respect to specific growth factors, cytokines, lipid mediators, adhesion molecules, and transcription factors. However, a staggering amount of information from microarray experiments is also being generated at a rapid pace. If properly annotated and explored, this information will expand our knowledge regarding yet-to-be-identified unique, complementary, and/or redundant molecular pathways in implantation. It is hoped that the forthcoming information will generate new ideas and concepts for a process that is essential for maintaining procreation and solving major reproductive health issues in women. (*Endocrine Reviews* 25: 341–373, 2004)

- I. Introduction
- II. Preimplantation Embryo Development and Genomic Activation
- III. Species-Specific Morphological Blueprint and Timing of Implantation
- IV. Delayed Implantation
- V. Window of Implantation: A Transient and Unique Moment
- VI. Embryo-Uterine Signaling Pathways in Implantation
  - A. Steroid hormone signaling
  - B. Signaling via adhesion molecules: cell-cell interactions

Abbreviations: 2-AG, 2-Arachidonoylglycerol; Ang1, angiopoietin-1; ARNT, aryl hydrocarbon nuclear translocator; BMP, bone morphogenetic protein; CBP, cAMP response element-binding protein (CREB)-binding protein; cdk, cyclin-dependent kinase; CKI, cyclin-dependent kinase inhibitor; COX-2, cyclooxygenase-2; DDRT-PCR, differential display RT-PCR; ECM, extracellular matrix; EGF, epidermal growth factor; EGF-R, EGF receptor; ER, estrogen receptor; ERE, estrogen response element; FGF, fibroblast growth factor; FLK1, fetal liver kinase 1; FLT1, fms-like tyrosine kinase 1; H<sub>2</sub>, histamine type 2 receptor; HB-EGF, heparin-binding EGF-like growth factor; HDC, histidine decarboxylase; HIF, hypoxia-inducible factor; ICM, inner cell mass; IHH, Indian hedgehog; LIF, leukemia inhibitory factor; MMP, matrix metalloproteinase; NRP1, Neuropilin-1; 4-OH-E<sub>2</sub>, 4-hydroxy-17 $\beta$ -estradiol; PBP, PPAR-binding protein; PDZ, primary decidual zone; PG, prostaglandin; PGI<sub>2</sub>, prostacyclin; PIGF, placental growth factor; PPAR, peroxisome proliferator-activated receptor; PR, progesterone receptor; PRIP, PPAR-interacting protein; PTC, Patched; RGD, Arg-Gly-Asp sequence; RIP, receptor interacting protein; RXR, retinoid X receptor; SAGE, serial analysis of gene expression; SDZ, secondary decidual zone; SRC, steroid receptor coactivator; TIF, transcriptional intermediary factor; TIMP, tissue inhibitor of MMPs; TR, thyroid hormone receptor; VEGF, vascular endothelial growth factor.

*Endocrine Reviews* is published bimonthly by The Endocrine Society (<http://www.endo-society.org>), the foremost professional society serving the endocrine community.

- C. Signaling by vasoactive factors
- D. Signaling by growth factors
- E. Signaling by cytokines
- F. Homeobox genes in implantation
- G. Ligand-dependent nuclear receptors and coactivators in implantation
- H. Cell cycle regulation and signaling in implantation and decidualization
  - I. Matrix remodeling and angiogenesis during implantation and decidualization
- VII. Emerging Concepts
  - A. Endocannabinoid signaling in implantation
  - B. Developmental genes in implantation
  - C. Discovery of novel implantation-related genes
- VIII. Perspectives and Future Directions

## I. Introduction

PROCREATION, BOTH SEXUAL and asexual, is a fundamental evolutionary process necessary to sustain life. Viviparity is a landmark in the process of evolution. Sexual procreation in higher eukaryotes, especially in mammals, is often inferior to asexual procreation in prokaryotes and in some eukaryotes with respect to sheer number of progeny. Thus, mammalian reproduction is more complex and highly regulated for the propagation of superior offspring to carry on the task of procreation. The nurturing of an offspring within the body and producing a live birth is an enduring task. This process demands safeguard regulatory systems at various critical steps. The assembly of a new life first depends on the union between a sperm and an egg (ovum) culminating in fertilization; failure to achieve such a union leads to their demise. The one-cell fertilized egg, termed embryo, undergoes several mitotic cell divisions,

eventually forming a differentiated tissue called the blastocyst with two distinct cell populations, the inner cell mass (ICM) and a layer of trophoblast cells surrounding the ICM (1). The embryo proper is derived exclusively from the ICM, whereas the placenta and extraembryonic membranes are produced from cells contributed mainly by the trophoblast. A two-way interaction between the blastocyst and maternal uterine luminal epithelium initiates the process of implantation, a process by which blood vessels of the embryo are brought into functional communication with the maternal circulation leading to the establishment of a functional placenta and pregnancy. Maternal resources filtered across the selective barrier of the placenta protect and nourish the conceptus. Placental types have been classified into three categories: hemochorial (rodents, humans, and nonhuman primates), epitheliochorial (horses, cows, sheep, and pigs), and endotheliochorial (most carnivores) (reviewed in Ref. 2).

A significant pregnancy loss resulting from preimplantation embryonic death is common to many mammals and is considered to be a selection process leading to the survival of superior embryos for implantation. However, dysregulation of the events before, during, or immediately after implantation also may often be a cause for poor pregnancy rates in eutherian mammals. Understanding the mechanism of preimplantation embryonic development and implantation in the uterus has been a challenge to reproductive and developmental biologists with the goal of alleviating the problems of human infertility and ensuring the birth of quality offspring. Such knowledge is also necessary for developing novel contraceptive approaches to restrict world population growth.

The current state of our knowledge of preimplantation and implantation physiology is the result of the accumulation of scientific observations gathered over many years. Implantation is a complex process involving spatiotemporally regulated endocrine, paracrine, autocrine, and juxtacrine modulators that span cell-cell and cell-matrix interactions. However, the precise sequence and details of the molecular interactions involved have not yet been defined. Furthermore, the implantation process varies among species, thus precluding the formulation of a unified theme. In addition, ethical restrictions and experimental difficulties prevent direct analysis of embryo-uterine interactions during human implantation. Thus, it is an onerous task to write a review on the molecular basis of embryo-uterine interactions during implantation that could be relevant to mammals in general. This review focuses primarily on the physiological and molecular basis of implantation in mice because more mechanistic information is now available for this species. However, an attempt has been made to indicate comparative analyses based on limited work in other species.

Despite experimental success in initiating embryonic development outside the womb and in identifying numerous molecules involved in the embryo-uterine dialogue (3–7), there is a yet-to-be-filled significant knowledge gap in understanding the *in vivo* events of implantation. The successful implantation of an embryo is contingent upon cellular and molecular cross-talk between the uterus and the embryo. The coordination of the endocrine, cellular, and molecular events via paracrine, autocrine, and/or juxtacrine factors in a dy-

namic manner produces within the uterus a favorable environment, the receptive state, to support implantation. The embryo also functions as an active unit with its own molecular program of cell growth and differentiation. Thus, deficiencies in uterine receptivity, embryo development, or the embryo-uterine dialogue will compromise fertility. This review of the implantation process focuses on the molecular basis of embryo homing and attachment, on elucidating the reciprocal signaling networks between the embryo and uterus, and on determining genetic causes of implantation failure.

## II. Preimplantation Embryo Development and Genomic Activation

Preimplantation embryo development and differentiation, which culminate in the formation of a blastocyst, require the activation of the embryonic genome, a process that is essential to implantation. The maternal-zygotic transition occurs at the two-cell stage in mice and other rodents, between the eight- and 16-cell stages in cows and sheep, and between the four- and eight-cell stages in humans (reviewed in Ref. 8). Upon activation of the embryonic genome, the embryo grows rapidly to form a blastocyst. At the blastocyst stage, embryos mature and escape from their zona pellucida to gain implantation competency. The differentiated and expanded blastocyst is composed of three cell types: the outer polarized epithelial trophoblast, the primitive endoderm, and the pluripotent ICM. The ICM provides the future cell lineages for the embryo proper (9, 10), and the trophoblast, the very first epithelial cell type in the developmental process, makes the initial physical and physiological connection with the uterine luminal epithelium. The ICM is not identifiable in marsupial blastocysts that appear as a hollow ball of cells with similar morphological characteristics. It is also not known which cells are programmed to form the embryo proper (reviewed in Ref. 10). The formation of the trophoblast and its subsequent development into trophoblast tissue are crucial steps for the initiation of implantation and the establishment of pregnancy. Trophoblast cells produce a variety of growth factors, cytokines, and hormones that influence the conceptus and maternal physiology in an autocrine, paracrine, and/or juxtacrine manner (11, 12).

Preimplantation embryo development normally occurs within the zona pellucida. However, zona removal by various experimental manipulations does not deter embryonic development *in vitro* (13), suggesting that this glycoprotein barrier is not essential for development to progress. The nonadhesive nature of the zona pellucida is thought to facilitate the journey of embryos through the oviduct and from the oviduct to the uterus. In mice and rats, normal embryonic development to the blastocyst stage within the reproductive tract requires the presence of ovarian estrogen and progesterone (14). There is a reduced number of embryos and a reduced number of cells per embryo in the absence of these hormones (15), but treatment with estrogen and progesterone reverses these defects (16). Because there is no convincing evidence that estrogen and/or progesterone act directly on the preimplantation embryo (17), embryonic develop-

ment is considered to depend on growth-promoting factors originating from the reproductive tract under the influence of these hormones. However, apparently normal development in simple defined media in culture suggests that pre-implantation embryos are capable of producing their own growth-promoting factors (reviewed in Ref. 18). In fact, several growth factors, cytokines, and their receptors are expressed in the embryo, and the proliferative and differentiating effects of these factors on embryonic development and functions have been observed (reviewed in Refs. 3 and 18–20).

### III. Species-Specific Morphological Blueprint and Timing of Implantation

Implantation is the process by which the blastocyst comes into intimate physical and physiological contact with the uterine endometrium. Enders and Schlafke (21, 22) have classified the process of implantation into three stages: apposition, adhesion, and penetration. Apposition is the stage when embryonic trophoblast cells become closely apposed to the uterine luminal epithelium. This is followed by the adhesion stage in which the association of the trophoblast and the luminal epithelium is sufficiently intimate as to resist dislocation of the blastocyst by flushing the uterine lumen. The stage of penetration involves the invasion of the luminal epithelium by the trophoblast. Stromal cell differentiation into decidual cells (decidualization) is more extensive, and the loss of the luminal epithelium is evident at this stage. These three stages of implantation form a continuum.

In mammals, especially rodents, a generalized stromal edema occurs before the beginning of apposition. This event leads to the closure of the uterine lumen, which results in interdigitation of the microvilli of the trophoblast and the luminal epithelia (apposition), followed by closer contact between them (the adhesion or attachment reaction). Luminal closure occurs throughout the entire uterus during pregnancy or pseudopregnancy and thus does not require the presence of blastocysts. Priming of the uterus with progesterone alone appears to be sufficient for this event to occur; luminal closure does not occur in the absence of progesterone. Although luminal closure and apposition occur in progesterone-treated delayed implanting mice, the attachment reaction does not occur. Estrogen treatment is required for attachment to occur.

Bonnet (23), on the basis of different types of blastocyst-uterine cell-cell interactions, classified implantation into three categories: central, eccentric, and interstitial. Central implantation occurs in mammals such as rabbits, ferrets, and some marsupials. In these animals, blastocysts grow and expand extensively before implantation. In contrast, the blastocysts of mice, rats, and hamsters are small and show modest expansion. In these species, an implantation chamber is formed by the invagination of the uterine epithelium, which is a characteristic of eccentric implantation. In guinea pigs, chimpanzees, and humans, the implantation process is of the interstitial type, *i.e.*, blastocysts are embedded within the subepithelial stroma. The results of ultrastructural studies led Schlafke and Enders (24) to classify implantation into

intrusive, displacement, and fusion types. In the intrusive type of implantation, which occurs in humans and guinea pigs, the trophoblasts penetrate through the luminal epithelium, reaching and extending through the basal lamina. The displacement type of implantation occurs in rodents; the luminal epithelium is freed from the underlying basal lamina, facilitating the spread of trophoblasts through the epithelium. The fusion type of implantation, in which trophoblasts make a connection with the luminal epithelium by forming symplasma, occurs in the rabbit. In many rodents, including mice and rats, implantation always occurs at the antimesometrial side of the uterus, whereas in some bats, implantation is mesometrial. In other animals, the embryos elongate and either attach over the entire endometrium (horse, pig, and wallaby) or only at specialized areas known as caruncles (cow and sheep) (2). Schematic diagrams for different types of implantation have been illustrated previously (2, 3).

The attachment reaction coincides with a localized increase in stromal vascular permeability at the site of the blastocyst, as can be demonstrated by iv injection of a macromolecular blue dye (uterine blue reaction) (25). The first sign of the attachment reaction (apposition stage) in the process of implantation occurs in the mouse and rat on the evenings of d 4 and d 5, respectively, and on d 6.5 in the rabbit (25–27). In the primates, the attachment reaction occurs approximately on d 8 in humans and baboons, on d 9 in macaques, and on d 11 in marmoset monkeys (28, 29). In large domestic animals, the first signs of attachment occur on d 13 in pigs, on d 20 in cows, on d 16 in sheep, and on d 19 in goats (30).

In both mice and humans, stromal cells surrounding the implanting blastocyst undergo decidualization, eventually embedding the embryo into the antimesometrial stromal bed. In mice, blastocysts are oriented with their ICMs directed mesometrially, whereas in humans the ICM is directed antimesometrially. The mechanism by which the blastocyst is directed to the antimesometrial luminal epithelium or by which the orientation of the blastocyst is achieved at the time of implantation remains elusive. There is evidence that in progesterone-treated delayed implanting mice, blastocysts are placed antimesometrially, and interdigitation (apposition) of luminal epithelial cell microvilli occurs with those of the abembryonic or lateral trophoblast cells of the blastocyst with its ICM oriented toward the uterine lumen. This observation led to the suggestion that upon initiation of the attachment reaction and subsequently the implantation process by estrogen, blastocysts retain the orientation they adopted during delay. During normal implantation in mice with the onset of luminal closure, blastocysts are placed at the antimesometrial side of the lumen along the uterine axis. Shortly after the luminal closure, zona-encased blastocysts are located in implantation chambers with random orientation of the ICMs. However, by the beginning of the attachment reaction, blastocysts are correctly oriented with their ICMs directed at the mesometrial pole. This observation suggested that the trophoblast of the entire blastocyst surface has the potential for attachment to the luminal epithelium, and that attachment occurs randomly immediately after the loss of the zona pellucida. Evidence was presented



to suggest that the correct orientation of the blastocyst is achieved by free movement of the ICM. However, further investigation is necessary to resolve this issue. All of these events, from the luminal closure to the attachment reaction, occur between about 86 and 92 h after coitum in mice (reviewed in Refs. 31 and 32).

#### IV. Delayed Implantation

Delayed implantation is a process by which implantation is postponed for a certain period. The uterus remains in a quiescent state, and embryos at the blastocyst stage become dormant. Delayed implantation occurs in many vertebrate species, but the underlying mechanisms that direct this process are different in various species that have adapted to this reproductive strategy (33). In mice and rats, ovariectomy before the presumed estrogen surge in the morning of d 4 of pregnancy results in the failure of implantation and initiates a state of dormancy of the blastocyst within the uterine lumen (25, 34). This condition is referred to as delayed implantation and can be maintained for many days by continued treatment with progesterone. The process of implantation with blastocyst activation can be rapidly initiated by a single injection of estrogen in the progesterone-primed uterus (25, 34). The mechanisms by which estrogen mediates the processes of blastocyst activation and implantation are poorly understood. Delayed implantation also occurs naturally (facultative) during lactation after postpartum ovulation and fertilization of the egg in mice and rats (35, 36). However, implantation ensues rapidly after termination of the suckling stimulus. The occurrence of lactational delay in these species is due to the secretion of an insufficient amount of ovarian estrogen. Mustelids, marsupials, and many other species also exhibit obligatory seasonal delayed implantation (37–40). Delayed implantation does not occur in some species such as the hamster, guinea pig, rabbit, and pig. Whether this phenomenon occurs in humans is not known. The delayed implantation models in mice and in other species could be exploited more extensively to better understand the molecular signaling that emanates from the embryo and influences uterine biology and vice versa.

#### V. Window of Implantation: A Transient and Unique Moment

In all eutherian mammals thus far studied, the uterus differentiates into an altered state when blastocysts are capable of effective two-way communication to initiate the process of implantation. This state is termed uterine receptivity for implantation and lasts for a limited period. At this stage, the uterine environment is able to support blastocyst growth, attachment, and the subsequent events of implantation (30, 41–43). The major factors that specify uterine receptivity are the ovarian steroids, progesterone and/or estrogens. Ovarian progesterone and estrogen are crucial for implantation in mice and rats, but ovarian estrogen is not essential for implantation in pigs, guinea pigs, rabbits, and hamsters (41, 44–48). Estrogen-synthesizing capacity has been demonstrated in rabbit and pig embryos, but whether

embryonic estrogen plays a role in implantation in these species is still debatable. Recent evidence suggests that hamster blastocysts express the aromatase gene (Paria, B. C., unpublished results). The mouse embryo lacks aromatase activity necessary for estrogen synthesis (reviewed in Ref. 49). Whether preimplantation estrogen secretion by the ovary or embryo plays a role in human implantation is unknown.

In mice and rats, the coordinated actions of progesterone and estrogen regulating proliferation and/or differentiation of uterine cells in a spatiotemporal manner establish the window of implantation (50). For example, on the first day of pregnancy (vaginal plug) in mice, uterine epithelial cells undergo proliferation under the influence of the preovulatory estrogen secretion. Rising levels of progesterone secreted from freshly formed corpora lutea initiate stromal cell proliferation from d 3 onward. The stromal cell proliferation is further stimulated by a small amount of ovarian estrogen secreted on the morning of d 4 of pregnancy. These coordinated effects of progesterone and estrogen result in the cessation of uterine epithelial cell proliferation, initiating differentiation (50). During normal pregnancy, the presence of an active blastocyst in the uterus is the stimulus for the implantation reaction. After the attachment reaction is initiated on d 4 at 2400 h, stromal cells surrounding the implanting blastocyst begin to proliferate extensively and differentiate into decidual cells (decidualization) (30). In pseudopregnant mice, the steroid hormonal milieu within the uterus is similarly maintained due to the presence of newly formed corpora lutea. Thus, the sensitivity of the pseudopregnant uterus to implantation on d 1–4 is quite similar to normal pregnancy, and blastocyst transfer into the uterine lumen during the receptive phase provokes normal implantation reactions and subsequent decidualization. Although blastocysts are the normal inducers of these events, various nonspecific stimuli, such as intraluminal infusion of oil, air, and mechanical stimuli can also initiate certain aspects of the decidual cell reaction (deciduoma) in pseudopregnant or steroid hormonally prepared uteri (30). However, there is evidence that the initial uterine reactions induced by nonspecific stimuli are different from those induced by blastocysts (51, 52).

Uterine sensitivity with respect to steroid hormonal requirements and implantation has been classified as pre-receptive, receptive, and nonreceptive (refractory) phases (30, 41). These phases have been defined by employing embryo transfer experiments in pseudopregnant mice. In the mouse, whereas the uterus is fully receptive on d 4, it is considered prereceptive on d 1–3 of pregnancy or pseudopregnancy. The mouse uterus can be rendered receptive to blastocyst implantation only if exposed to a small amount of estrogen after 24–48 h of progesterone priming (53). Evidence suggests that the uterus is most receptive to implantation on d 4 (43), and the efficiency of implantation decreases with time (54). By d 6, the uterus becomes completely refractory to blastocyst implantation. Recent evidence suggests that concentration of estrogen within a very narrow range determines the duration of the window of uterine receptivity in mice; uterine receptivity remains open for an extended period at lower estrogen levels but

rapidly closes at higher levels. Uterine nonreceptivity induced at high estrogen levels is accompanied by aberrant uterine expression of implantation-related genes. These results suggest that careful regulation of estrogen levels could improve female fertility in *in vitro* fertilization programs (55). Another critical factor determining the window of implantation is the state of activity of the blastocyst, as described below.

In mice and rats, ovariectomy before the preimplantation estrogen secretion on the morning of d 4 of pregnancy induces delayed implantation (34, 43). This status can be maintained for many days if progesterone treatment is continuously provided. Under this condition, blastocysts undergo zona hatching, albeit at a slower pace, but they become dormant without initiating the attachment reaction, and the progesterone-primed uterus remains in the neutral stage. However, a single injection of estrogen promptly induces blastocyst activation with the initiation of implantation in the progesterone-primed uterus. Active and dormant blastocysts are molecularly and physiologically distinguishable. Epidermal growth factor (EGF) receptor (EGF-R), cyclooxygenase-2 (COX-2), and histamine type 2 receptor (H<sub>2</sub>), the factors that are associated with blastocyst attachment reaction, are expressed in normal or active blastocysts but are down-regulated in dormant blastocysts (43, 56–59). In contrast, the G protein-coupled cannabinoid receptor CB1, which is activated by natural and endocannabinoids, is down-regulated in active blastocysts but remains up-regulated in dormant blastocysts (60). Collectively, these findings suggest that a complex array of molecular networks regulates blastocyst activation and dormancy.

Although estrogen is essential for blastocyst activation and implantation in the progesterone-primed mouse uterus, the mechanisms by which estrogen initiates these responses remain elusive. We speculated that estrogen actions in uterine preparation and blastocyst activation for implantation are two distinct events. Embryo transfer experiments in delayed implanting recipient mice provide evidence that whereas the primary estrogen, 17 $\beta$ -estradiol, initiates uterine events for implantation, its catechol metabolite, 4-hydroxy-17 $\beta$ -estradiol (4-OH-E<sub>2</sub>), participates in activation of dormant blastocysts (17). Blastocyst activation by 4-OH-E<sub>2</sub> involves COX-2-derived prostaglandins (PGs) and cAMP (17). The use of an estrogen receptor (ER) antagonist ICI-182,780 showed that, whereas estradiol via its interaction with the nuclear ERs participates in the preparation of the progesterone-primed uterus to the receptive state in an endocrine manner, 4-OH-E<sub>2</sub> produced from estradiol in the uterus mediates blastocyst activation in a paracrine manner that does not involve nuclear ERs. These results provide evidence that both primary and catecholestrogens are required for embryo-uterine interactions to ensure successful implantation and that implantation occurs only when uterine receptivity coincides with the activated state of the blastocyst. Molecular pathways that are potentially involved in uterine receptivity and blastocyst activation are discussed below in more detail.

## VI. Embryo-Uterine Signaling Pathways in Implantation

Recent advances in molecular and genetic approaches have led to the discovery of numerous molecules involved in embryo-uterine interactions; however, the precise sequence and details of the signaling cascades for many of these molecules have not yet been defined. This review attempts to focus on a select number of signaling molecules and pathways that are implicated in embryo-uterine interactions in relation to implantation (Fig. 1). A large number of other growth factors, cytokines, lipid mediators, and vasoactive agents that could well be involved in implantation are not addressed here due to space limitations.

### A. Steroid hormone signaling

As described earlier, ovarian estrogen is essential for blastocyst implantation in the progesterone-primed uterus in mice and rats. Despite considerable progress regarding the molecular mechanism of estrogen action, many fundamental questions remain unanswered. Estrogen action is normally considered to involve its interaction with a nuclear receptor (ER), a ligand-dependent transcription factor (61, 62). The nuclear ER exists primarily in two isoforms, ER $\alpha$  and ER $\beta$  (63, 64). The estrogen-ER complex forms a homodimer that binds to *cis*-acting estrogen response elements (EREs) in the regulatory regions of the target genes. The EREs for transcription activators are usually present in the 5'-flanking region of specific genes (65). Although a perfect palindromic consensus was identified as AGGTCA(*nnn*)TGACCT (66), most estrogen-responsive genes have imperfect palindromes or do not have recognizable EREs (65, 67–70). Thus, the contention that steroids or their mimics function only by interacting with nuclear receptors to serve as transcription activators for specific DNA response elements is no longer tenable. Several recent reports highlight the complexities in gene regulation by estrogens, including many of the protein-protein interactions mediated via the ER and coregulators (71–73). For example, cholera toxin, which has no ER-binding capacity, mimics the mitogenic action of estrogen in the uterus presumably by increasing cAMP levels and protein kinase A activity (74, 75). Protein kinase C can also modulate uterine ER levels, and protein kinase C inhibitors can reduce estrogen-induced mitogenic action (76). These results suggest that membrane-bound receptors acting via protein kinases can increase the expression of the same genes activated by steroid hormone nuclear receptors. This forms the basis for the view that other nonnuclear receptors also interact with steroids or their mimics. Although the presence of a membrane ER was postulated more than two decades ago (77), the subject remains controversial because of the lack of molecular identity. However, signaling by plasma membrane ERs is an emerging concept and requires special attention (78).

A large variety of natural and synthetic compounds that mimic natural estrogens and bind to the nuclear ER $\alpha$  are present in the environment (79, 80). A few of these xenobiotics possess an even higher affinity for ER $\beta$  than for ER $\alpha$  (81, 82). The interaction of xenoestrogens with ER is considered

FIG. 1. A scheme of signaling networks in embryo-uterine communication during implantation in mice. Implantation in mammals absolutely depends upon synchronized development of the blastocyst to the stage when it is competent to implant and the uterus to the stage when it is receptive to blastocyst growth and implantation. Ovarian estrogen ( $E_2$ ) and progesterone ( $P_4$ ) are the primary effectors that direct the prereceptive uterus to a receptive state via a number of locally expressed growth factors, cytokines, transcription factors, and vasoactive mediators in the uterus, whereas uterine-derived catecholesterogen and regulated levels of endocannabinoids activate the blastocyst to an implantation-competent state. During the attachment phase, signaling and adhesive events embracing the uterus and the blastocyst lead to implantation. Le, Luminal epithelium; S, stroma; CE, catechol estrogen.

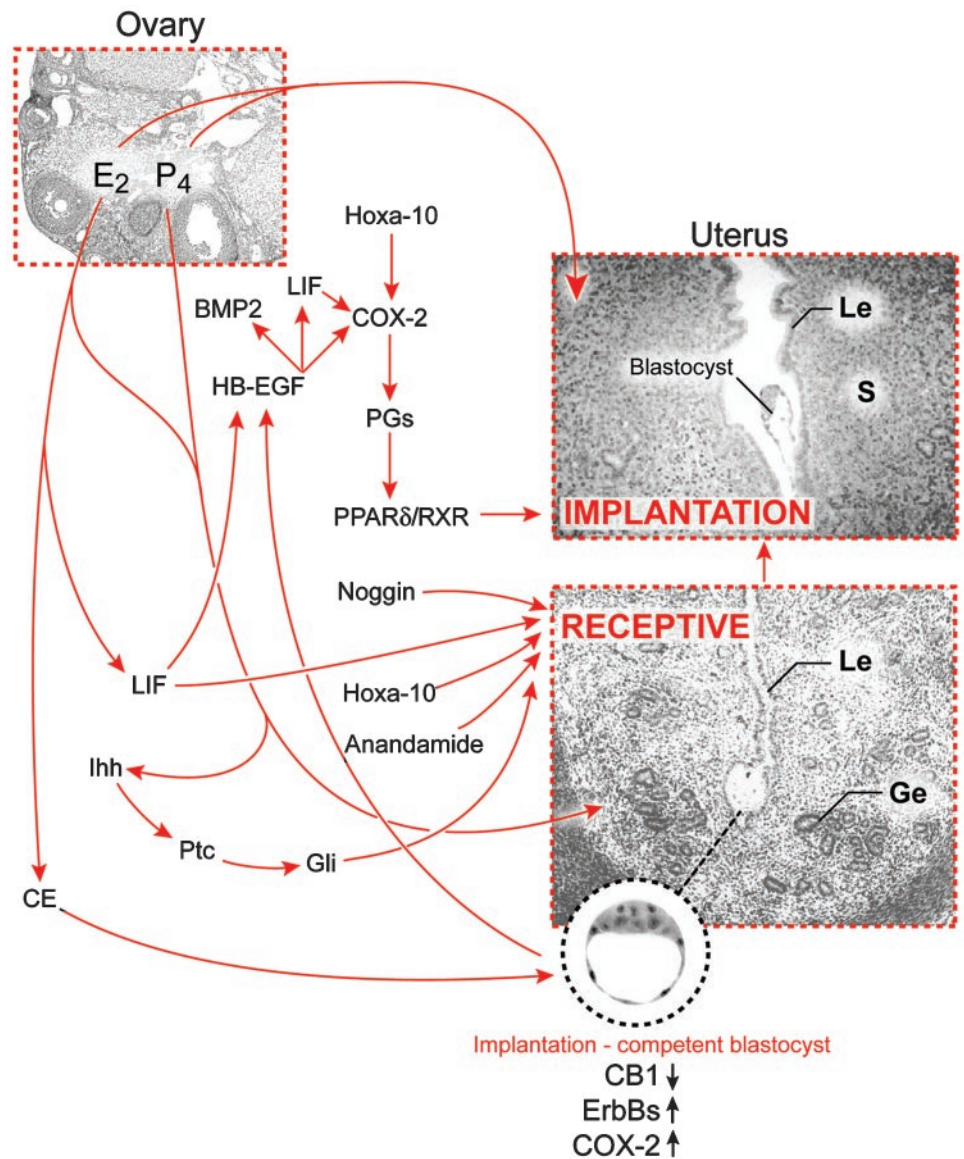

as the basis for their reproductive toxicity, although their affinity for the receptor is quite low (83, 84). However, there is evidence that responses to an estrogenic compound in target tissues are not necessarily related to its affinity for the receptor (85–88), suggesting the presence of other signaling pathways. Thus, xenoestrogens may interact with ER or other binding proteins that may not result in a similar kind of transactivation that normally occurs with natural ligands. Their estrogen-like effects in the uterus include an increase in water imbibition and ornithine decarboxylase activity, as well as increased DNA and protein synthesis. Xenoestrogens can also induce implantation in progesterone-primed rodents (89). Although the mechanisms of action of these xenoestrogens are not clear, these compounds have received a great deal of attention as a possible cause of certain cancers and impaired reproductive functions (reviewed in Refs. 80 and 90).

Emerging evidence indicates that many of the rapid uterine effects of estrogenic compounds do not involve the clas-

sical genomic effects (91–95). We and others have observed that  $ER\alpha$  mutant female mice, which show negligible classical responses to estrogen (96), nevertheless display estrogenic responses to catecholesterogens or xenoestrogens (91–95). For example, early uterine estrogenic responses, including gene expression and macromolecular uptake, are elicited by catecholesterogen or kepone independent of  $ER\alpha$  and/or  $ER\beta$  (91). Furthermore, genetic evidence suggests that several other early responsive target genes are induced in the mouse uterus by primary and catechol estrogens independent of nuclear ERs, suggesting nongenomic downstream events. These downstream signaling pathways represent Wnt signaling, protein processing, and calcium homeostasis (92). In contrast, estrogen, which induces the expression of many growth factors and their receptors and other secretory proteins, may facilitate their transport to the membrane and/or secretion by activating the membrane-trafficking pathway via nuclear ER (97). These results suggest that estrogen regulates diverse but interdependent sig-



naling pathways via ER-dependent and -independent processes.

Despite the evidence for nongenomic steroid hormone actions, differential uterine cell-specific expression of nuclear ER $\alpha$  and ER $\beta$  and the progesterone receptor (PR) during the periimplantation period in mice suggests that the coordinated effects of estrogen and progesterone in uterine events for implantation are primarily mediated via these nuclear receptors (98). Furthermore, gene-targeting experiments in mice lacking ER or PR provide valuable information regarding their roles in uterine biology that were not previously recognized. ER $\alpha$ ( $-/-$ ) mice exhibit infertility due to hyperstimulated ovaries and hypoplastic uteri (99). Furthermore, blastocyst transfers in estrogen- and progesterone-treated uteri of ER $\alpha$ ( $-/-$ ) mice have established that functional ER $\alpha$  is required for implantation (100). In contrast, ER $\alpha$ ( $-/-$ ) mice can induce and support decidualization (deciduoma) in response to artificial stimuli if primed appropriately with progesterone alone (101, 102). These results suggest that ER $\alpha$ ( $-/-$ ) mice fail to initiate and support implantation, perhaps due to the failure of the attachment reaction rather than the failure of decidualization events (91). Indeed, the genes and signaling pathways involved in decidualization are induced in ER $\alpha$ ( $-/-$ ) after application of an artificial stimulus (100). PR( $-/-$ ) mice show pleiotropic reproductive defects including impaired ovulation, uterine hyperplasia, and failure in decidualization (103). Selective deletion of the PR-A isoform also showed infertility but with a milder phenotype, suggesting that PR-A and PR-B serve as functionally distinct mediators of progesterone signaling *in vivo* (104). The results of experiments that used both PR( $-/-$ ) and PR-A( $-/-$ ) mice further reinforce a requirement of progesterone in decidualization (103, 104).

Gene-targeting experiments have established the importance of both ER and PR in uterine preparation for implantation in mice (99). However (98, 103), whether the preimplantation embryo is a direct target for steroid hormones remains unclear. Recent evidence suggests that preimplantation estrogen secretion on d 4 of pregnancy in mice has a dual role as primary estrogen and as a catecholesterogen with distinct targets (17). Whereas primary estrogen acts via the uterine ER to prepare the uterus for implantation, catecholesterogens formed locally in the uterus from the primary estrogen participate in blastocyst activation. However, it is still a mystery how catecholesterogens mediate activation of blastocysts (17). Although nuclear ER $\alpha$  is present in both active and dormant blastocysts (105), dormant blastocysts do not respond to estradiol and fail to attain implantation competency *in vitro*. In contrast, dormant blastocysts do respond to a catecholesterogen 4-OH-E<sub>2</sub> and become implantation competent *in vitro*. The ER antagonist ICI-182,780 fails to reverse this response, suggesting that nuclear ER signaling is not critical to blastocyst activation (17). These observations are surprising in the light of other recent findings that ER $\alpha$ , ER $\beta$ , and *efp* mRNAs are expressed in the preimplantation embryos (106, 107). Examining the direct roles of estrogens and/or progesterone in preimplantation embryo function and how steroid hormone signaling in the embryo and uterus are coordinated for implantation will require further investigation.

Estradiol undergoes hydroxylation to 4-OH-E<sub>2</sub> by a P450-linked enzyme CYP1B1 (108). This enzyme is present throughout the mouse uterus on d 4, but disappears from the implantation site on d 5 (17). Activation of dormant blastocysts appears to involve an early response to 4-OH-E<sub>2</sub>, because dormant blastocysts transferred into delayed implanting recipient uteri within 1 h of estradiol administration of the recipients show implantation, whereas similar blastocysts transferred beyond this 1-h period fail to implant (17). These results suggest that a rapid response that is critical to implantation occurs *in utero*. In contrast, dormant blastocysts cultured in the presence of 4-OH-E<sub>2</sub>, but not estradiol, gain implantation competency and, upon transfer, implant in pseudopregnant recipients well beyond the 1-h window of estradiol treatment. Similar results were also obtained by culturing dormant blastocysts in the presence of PGE<sub>2</sub> or a permeable analog of cAMP. This effect apparently involves the COX-2 signaling pathway (17). For example, cocubation of dormant blastocysts with a selective COX-2 inhibitor and 4-OH-E<sub>2</sub> efficiently blocks their activation and implantation upon transfer to suitable recipients. This effect of the COX-2 inhibitor was partially reversed by addition of PGE<sub>2</sub> to the culture media. The results strongly suggest that the action of 4-OH-E<sub>2</sub> on dormant blastocysts is mediated via the COX-2 signaling pathway, leading to an increase in intracellular cAMP levels. Further investigation will reveal the types of PGs and receptors involved in this event.

### B. Signaling via adhesion molecules: cell-cell interactions

Many glycoproteins and carbohydrate ligands and their receptors are expressed in the uterine luminal epithelium and blastocyst cell surfaces (reviewed in Refs. 109 and 110). Primary adhesion molecules that are implicated in implantation are selectins, galectins, heparan sulfate proteoglycans, Muc-1, integrins, cadherins, and the trophinin-tastin-bystin complex. Muc1 acts as an antiadhesive masking molecule (111). Muc1, a stretch of long carbohydrate moieties, is expressed in the mouse uterine epithelium before implantation. The physical hindrance created by these branches is thought to prevent interaction between the embryo and the luminal epithelium of the uterus before the attachment reaction. This is consistent with timely down-regulation of Muc1 from the luminal epithelium throughout the uterus before the attachment reaction in mice (reviewed in Ref. 3). In contrast, overall Muc1 expression increases in the rabbit and human uterus during the receptive period. However, careful examination revealed that there is indeed a decrease in Muc1 levels at the site of implantation in rabbits (112). In humans, the situation appears to be more complicated. During the apposition phase, the presence of an embryo increases the levels of Muc1 in the epithelium, but at the adhesion phase, the embryo induces a cleavage of Muc1 at the implantation site (113). Collectively, these findings suggest that Muc1 acts as an antiadhesive molecule that must be removed from the site of implantation.

Among the adhesion molecules, integrins have been studied more extensively in the human endometrium because of their cycle-dependent changes and the potential role in uterine receptivity. The members of the integrin family serve as

receptors for various extracellular matrix (ECM) ligands and modulate cell-cell adhesion and signal transduction events (114). Each integrin is comprised of two subunits,  $\alpha$  and  $\beta$ , and each  $\alpha\beta$ -combination has its own binding specificity and signaling properties. As membrane-associated receptors, integrins possess short cytoplasmic tails with no enzymatic activity. Signaling by integrins is mediated by associating adaptor proteins that bridge them to the cytoskeleton, cytoplasmic kinases, and transmembrane growth factor receptors (114). Several members of the integrin family, including  $\alpha v\beta 3$ , are known to interact with the RGD (Arg-Gly-Asp) peptide sequence present in many ECM proteins, such as fibronectin, laminin, and entactin. Although many integrin heterodimers show constitutive expression in the uterine epithelium or stroma,  $\alpha 1\beta 1$ ,  $\alpha 3\beta 1$ ,  $\alpha 6\beta 1$ ,  $\alpha v\beta 3$ , and  $\alpha v\beta 1$  heterodimers exhibit cycle-dependent changes (115–119). Of special interest is the expression of  $\alpha 1\beta 1$ , which shows implantation-related changes. For example, the expression of  $\alpha 1\beta 1$  is restricted to early- and midsecretory phases both in the epithelium and stroma and primarily restricted to the stroma during the predecidual phase (117). Furthermore, unexplained infertility in women is associated with the deficiency of  $\alpha v\beta 3$  or  $\alpha 4\beta 1$  in the uterus during the window of implantation (120). However, the functional definition of these markers in uterine receptivity or under pathological conditions still awaits further investigation. In mice,  $\alpha v\beta 3$  is expressed in both the uterine luminal epithelium and the blastocyst during implantation. It has been shown that an intrauterine injection of RGD peptide or neutralizing antibody against  $\alpha v\beta 3$  reduces the number of implantation sites in mice and rabbits (121).

Among many subunits,  $\alpha 5\beta 1$ ,  $\alpha 6\beta 1$ , and  $\alpha v\beta 3$  are expressed in the mouse embryo throughout the periimplantation period, whereas several others exhibit stage-specific expression (122). Integrins are also expressed in the differentiating trophoblasts at later stages (122), suggesting their roles in trophoblast differentiation and adhesion. A role for fibronectin via integrin binding in blastocyst outgrowth was further confirmed *in vitro* using antibodies against the  $\alpha v$ ,  $\alpha 5$ ,  $\beta 1$ , or  $\beta 3$ , which inhibited adhesiveness on the outer surface of the trophoblast inducible by fibronectin (123). In addition, a gene-targeting experiment revealed that deletion of the  $\beta 1$  gene results in ICM defects and embryonic lethality (124). However, the mutant embryos form morphologically normal blastocysts and initiate implantation, but trophoblast invasion becomes defective (124). Adhesion-competent, late-blastocyst-stage trophoblasts undergo intracellular signaling initiated upon ligation of  $\alpha 5\beta 1$  and  $\alpha v\beta 3$  by fibronectin (125). Integrin signaling mobilizes cytoplasmic  $Ca^{2+}$  and induces the trafficking of intracellular vesicles, resulting in stronger adhesion to fibronectin at the apical surface. Therefore, blastocyst adhesion to the endometrium during implantation is considered to be regulated by the endogenous developmental program, as well as through interactions with ECM components in the local environment (126, 127). Although there is evidence that the embryo is a site of action for integrin signaling, it is not yet clear whether the uterus is a site of action. Results of gene-targeting experiments of integrin subunits are not very informative in relation to their roles in

implantation because of the complex phenotypes and apparent compensation by other subunits (128–131).

Invasive mouse trophoblasts adhere, spread, and migrate on ECM substrates (132–135) and penetrate three-dimensional ECM structures (136, 137). Several ECM components that are up-regulated in the periimplantation endometrium, including fibronectin, laminin, and collagen type IV (138–140), support trophoblast outgrowth *in vitro* (132, 133). Trophoblast interactions with the ECM are mediated primarily by integrins (122, 123, 133–135, 141). Hexapeptides containing the RGD sequence recognized by integrins (142) block trophoblast outgrowth on fibronectin, collagen type II and IV, entactin, and vitronectin (133, 135, 141). However, trophoblast adhesion to type I laminin is independent of its RGD sequence and is primarily mediated through interaction of  $\alpha 7\beta 1$  with the E8 integrin-recognition domain of laminin (143, 144).

Trophinin was identified by cDNA library screening of a human trophoblastic cell line (145). This transmembrane protein can mediate homophilic interactions between two different cell types. For example, it mediates an interaction between a human endometrial cell line and a trophoblastic cell line, but this interaction is complex (145). Trophinin requires the presence of a cytoplasmic protein tastin to sustain adhesion between these two cell types. In addition, the presence of bystin, another cytoplasmic protein, is required for effective interaction between trophinin and tastin. This adhesion complex, which is present in both trophoblastic teratocarcinomas and endometrial adenocarcinomas, mediates adhesion between them. In humans and monkeys, trophinin is specifically expressed in cells involved in implantation. Furthermore, the trophinin complex was detected in both trophoblast and decidual cells at the human fetal-maternal interface as early as the sixth week of pregnancy (146). Although trophinin expression in mice coincides with the timing of implantation, it is expressed in the luminal and glandular epithelium throughout the uterus irrespective of the presence or absence of blastocysts, raising doubts regarding its role specific to implantation (147).

E-cadherin, a calcium-dependent cell-cell adhesion molecule, participates in the formation of the epithelial adherens junctions in cooperation with  $\alpha$ - and  $\beta$ -catenins (148, 149). E-cadherin is a critical factor for blastocyst formation, because its targeted deletion leads to defective embryonic development resulting in failure to form the trophoblast (150, 151). E-cadherin is implicated in uterine-embryo interactions because of its homotypic adhesive activity (152). Whereas the trophoblast highly expresses E-cadherin, the components of the adherens junctional complex are also expressed in the uterine luminal epithelium at the time of the attachment reaction. The expression subsequently becomes evident in the subepithelial stroma surrounding the implanting blastocysts with apoptosis occurring in the luminal epithelium (152, 153). Therefore, it is speculated that temporal and cell-specific expression of the adherence junction proteins in the uterus results in molecular guidance, which is important for blastocyst attachment and subsequent invasion.

A recent study has highlighted the critical role of the selectin adhesion system in human implantation (154). This adhesion system, which is involved in leukocyte capture



from the bloodstream, is also operative during implantation and placentation. On the maternal side, selectin oligosaccharide ligands are expressed in the receptive uterine epithelium, and on the embryonic side, trophoblast cells expressed L-selectin receptors. It was observed that beads coated with specific selectin ligands adhere to the trophoblast, suggesting that the trophoblast cell surface receptors are functional. This investigation suggests that trophoblast L-selectin mediates interactions with the uterus to establish an adhesion mechanism for implantation. This is an exciting finding in several respects. First, this study affirms that specific ligand-receptor signaling pathways between the embryo and uterus are critical for implantation and subsequent pregnancy establishment. Second, it shows that the same mechanism operative during implantation is also operative during the later phases of pregnancy. Third, it shows that trophoblast cells share a system known to be active in the blood-vascular system. Similar adhesion signaling between the transmembrane form of heparin-binding EFG-like growth factor (HB-EFG) expressed on the luminal epithelial surface and ErbB receptors present on the trophoblast cell surface for implantation in mice and humans has been reported previously (57, 155).

### C. Signaling by vasoactive factors

It has long been speculated that vasoactive agents, such as histamine and PGs, are involved in many aspects of reproduction including ovulation, fertilization, implantation, and decidualization. Histamine functions as a ubiquitous mediator of cell-cell signaling and is synthesized from L-histidine by histidine decarboxylase (HDC) both in peripheral tissues and in the nervous system (156). Histamine is a well-known neurotransmitter in the brain (157), but it is also involved in other physiological responses including gastric acid secretion, regulation of allergic reactions, and vascular permeability (reviewed in Ref. 158). Because the process of implantation is considered a proinflammatory reaction and because increased vascular permeability at the site of blastocyst implantation is common to many species, it was suggested that histamine plays a role in implantation and decidualization (158). Earlier observations suggested that uterine mast cells are a possible source of histamine, and its release from mast cells by estrogen is important for implantation (159, 160). This suggestion was based on the observations that local histamine application stimulates uterine hyperemic and edematous responses (161) and that there is a reduction in uterine mast cell numbers and histamine content after estrogen treatment and during implantation (162). Furthermore, a histamine antagonist pyrazolazine or an inhibitor of HDC was shown to interfere with implantation when instilled into the uterine lumens of rats and rabbits (159, 163). Histamine works via at least four histamine receptor subtypes ( $H_1$ ,  $H_2$ ,  $H_3$ , and  $H_4$ ) (164–166) and blocking both  $H_1$  and  $H_2$  receptors was shown to interfere with implantation (167). Subsequent studies also showed that histamine induces implantation in delayed implanting rats when injected with a suboptimal dose of estrogen (168). However, successful implantation and birth of live offspring in mast cell-deficient mice and other evidence suggest that uterine mast cell histamine is not essential for implantation

(136, 169, 170). Thus, if histamine is involved in implantation, it should be provided either by major uterine cell types or by embryonic cells. A recent study showed that mouse blastocysts do not have the capacity for histamine synthesis (59). However, HDC is expressed in uterine epithelial cells on d 4 of pregnancy in mice before implantation, but not in decidual cells (171). Thus, although histamine may have a role in implantation in mice, its role in decidualization is unlikely. Whereas  $H_1$ ,  $H_2$ , and  $H_3$  receptor subtypes are not detectable in the uterus,  $H_2$  receptors are expressed in preimplantation mouse blastocysts. These observations, as well as the inhibition of blastocyst zona-hatching and implantation by  $H_2$  antagonists and an HDC inhibitor, suggest that uterine histamine targets the blastocyst for implantation (59). However, apparently normal implantation occurs in mice lacking *HDC* or  $H_2$  type histamine receptor genes, suggesting the possible involvement of other vasoactive agents with overlapping functions in this process (165, 172).

PGs possess vasoactive, mitogenic, and differentiating properties (173) and are implicated in various female reproductive functions. COX, which exists in two isoforms, COX-1 and COX-2, is the rate-limiting enzyme in the biosynthesis of PGs. COX mediates the conversion of arachidonic acid into  $PGH_2$ , which is then converted to various PGs by specific synthases (173). The COX isoforms are encoded by two separate genes and exhibit distinct cell-specific expression, regulation, and subcellular localization, yet share similar structural and kinetic properties. COX-1 is considered to be a constitutive enzyme that mediates housekeeping functions. In contrast, COX-2 is an inducible enzyme and is induced in a variety of cell types by growth factors, cytokines, and inflammatory stimuli (173). PGs normally exert their function by interacting with cell surface G protein-coupled receptors, but they can also function as ligands for nuclear peroxisome proliferator-activated receptors (PPARs) (174–177). Because COX-2 is primarily responsible for increased PG production during inflammation, this isoform is the target for development of selective antiinflammatory drugs (178, 179). COX-2 overexpression is also associated with tumorigenesis (180, 181).

The processes of ovulation and implantation are considered analogous to proinflammatory responses, and thus participation of PGs in these events has been speculated (182, 183). For example, PGs are considered to participate in follicular rupture during ovulation (reviewed in Ref. 184). This is consistent with gonadotropin-mediated induction of COX-2 in ovarian follicles preceding ovulation (85, 184). PGs are also implicated as important mediators of increased endometrial vascular permeability during implantation and decidualization (185). A unique pattern of expression of *Cox-1* and *Cox-2* genes in the periimplantation mouse uterus further suggests that PGs play important roles in these processes (185). *Cox-1* is expressed in uterine luminal and glandular epithelial cells on the morning of d 4 of pregnancy, but its expression becomes undetectable in the luminal epithelial cells by the time of the attachment reaction. In contrast, *Cox-2* is expressed in the luminal epithelium and underlying stromal cells solely at the site of blastocyst attachment. Using the delayed implantation model, this study also established that the expression of *Cox-2* in the receptive uterus requires the

presence of active blastocysts. The results suggested that *Cox-2* expression during the attachment reaction is critical to implantation (185). Indeed, gene-targeting experiments have demonstrated that COX-2-derived PGs are essential for implantation and decidualization (186–188). Experiments with *Cox-1*(–/–) mice suggest that the loss of COX-1 is compensated by the expression of *Cox-2* for implantation (189). Among various PGs, the levels of prostacyclin (PGI<sub>2</sub>) are highest at the implantation sites of wild-type mice, and implantation defects are partially restored in *Cox-2*(–/–) mice by administration of a more stable PGI<sub>2</sub> agonist, carbaprostacyclin (190).

The role of PGs is further illustrated by the reduced fertility of female mice lacking cytoplasmic phospholipase A<sub>2</sub>, which is involved in the liberation of arachidonic acid from membrane phospholipids for PG synthesis by the COX system (191–193). The reduced fertility in these females is due to deferral of on-time implantation, leading to subsequent retarded fetoplacental development and reduced litter size (54). Collectively, these results indicate that the cytoplasmic phospholipase A<sub>2</sub>-COX-2 axis is crucial to implantation. However, one recent study described that wild-type (B6C3H) blastocysts transferred into COX-2-deficient female mice on a mixed (C57Bl6/JX129S7/SvEvBrd) background on d 3 of pseudopregnancy implanted and produced live offspring, although decidual growth was retarded (194). Because this study did not follow experimental protocols similar to other studies, the discrepancy between this study and others cannot be compared scientifically. However, some of the results reported by Cheng and Stewart (194) remain uninterpretable. For example, dissected decidual weights reported by these investigators seem abnormally high on various days of pregnancy, and the sizes of d 7 implantation sites shown appeared larger than d 8 implantation sites and at a more advanced stage of pregnancy. Nonetheless, recent evidence demonstrates that *Cox-2* is expressed either in the uterus, blastocyst, or both during implantation in a variety of species with different modes of implantation, including sheep, mink, skunk, baboon, and pig (195–198). COX-2 expression in human endometrium has also been reported (199, 200). These results suggest a conserved function of COX-2 in implantation in various species. However, it has been discovered recently that, depending on the genetic background, COX-1 can rescue female infertility in COX-2-deficient mice (201).

PGs exert diverse functions using both cell surface PG receptors and PPARs. Receptors for PGE<sub>2</sub>, PGF<sub>2α</sub>, PGD<sub>2</sub>, PGI<sub>2</sub>, and thromboxanes have been named as EP<sub>1</sub>–EP<sub>4</sub>, FP, DP, IP, and TP, respectively; they belong to the G protein-coupled family of cell surface receptors (reviewed in Refs. 202 and 203). Although PGE<sub>2</sub> synthase is expressed at the implantation sites with the presence of PGE<sub>2</sub> and EP receptors (203–205) and although PGE<sub>2</sub> has been shown to be associated with implantation and decidualization (206), gene-targeting experiments show that three of the four EP receptor subtypes (EP<sub>1</sub>–EP<sub>3</sub>) are not critical for implantation. EP<sub>4</sub> deficiency results most frequently in perinatal lethality, and thus its role in implantation has not yet been determined (reviewed in Ref. 203). Furthermore, mice deficient in FP or IP show normal implantation. PGs can also exert their effects

by utilizing PPARs that belong to a nuclear hormone receptor superfamily. The evidence that PG-mediated PPAR signaling is involved in implantation is discussed below in more detail. PGs also appear to be important for embryonic functions relevant to preimplantation embryo development and implantation. Preimplantation embryos produce PGs, and inhibitors of PG synthesis have been shown to inhibit embryonic growth, functions, and zona hatching *in vitro* (207, 208). Dormant mouse blastocysts can achieve implantation competence if cultured in the presence of PGE<sub>2</sub> or a permeable analog of cAMP. This effect apparently involves the COX-2 signaling pathway (17). However, normal development of *Cox-1*(–/–)/*Cox-2*(–/–) double-mutant embryos in the uterus suggests that PGs of embryonic origin are not essential for embryo development (208). However, compensation by maternal PGs in embryonic development cannot be ruled out. Vascular endothelial growth factor (VEGF), also known as vascular permeability factor, is highly vasoactive in nature. It is a potent inducer of vasodilation and angiogenesis. Its role in implantation is discussed below.

#### D. Signaling by growth factors

The expression of various growth factors and their receptors in the uterus in a temporal and cell-specific manner during the periimplantation period suggests that these factors are important for implantation (3–6, 209, 210). The present review highlights primarily the importance of the EGF family of growth factors; however, the roles of other growth factors, such as TGFβs, fibroblast growth factors (FGFs), IGFs, platelet-derived growth factors, and many others should not be ignored. The EGF family of growth factors includes EGF itself, TGFα, HB-EGF, amphiregulin, betacellulin, epiregulin, and neuregulins (58, 211). *HB-EGF* is the earliest molecular marker found in the uterus exclusively at the sites of active blastocysts appearing several hours before the attachment reaction in mice (26). This induction is followed by the expression of *betacellulin*, *epiregulin*, *neuregulin-1*, and *Cox-2* around the time of the attachment reaction (58, 185, 211). In contrast, *amphiregulin* is expressed throughout the uterine epithelium on the morning of d 4 of pregnancy and is well characterized as a progesterone-responsive gene in the uterus (212). Around the time of the attachment reaction, strong expression of *amphiregulin* in the luminal epithelium is found only around the implanting blastocysts, and this expression is absent by the morning of d 5. Although these results suggested that amphiregulin has a role in implantation, amphiregulin-deficient mice or compound knockout mice for *EGF/TGFα/amphiregulin* do not exhibit implantation defects (213, 214). Because *HB-EGF*, betacellulin, epiregulin, neuregulin, and amphiregulin all show overlapping uterine expression patterns around the implanting blastocyst at the time of attachment reaction (reviewed in Refs. 3 and 211), it is assumed that a compensatory mechanism rescues implantation in the absence of one or more members of the EGF family.

The EGF-like growth factors interact with the receptor subtypes of the *erbB* gene family, which is comprised of four receptor tyrosine kinases: ErbB1 (EGF-R), ErbB2, ErbB3, and ErbB4. They share common structural features but differ in

their ligand specificity and kinase activity (215). The initial dimerization between coexpressed receptors upon ligand binding constitutes the classical mechanism of action of EGF-like ligands. Spatiotemporal expression patterns of EGF gene family members and *ErbBs* in the uterus during the periimplantation period suggest compartmentalized functions of EGF-like growth factors in implantation (58).

A number of growth factors and their receptors are expressed in preimplantation embryos of several species, suggesting their roles in preimplantation mammalian development (216, 217). In this review, we focus on potential roles of the EGF family of ligands with respect to preimplantation embryo development and implantation. ErbB1 (EGF-R), ErbB2, and ErbB4, the receptor subtypes for the EGF family of growth factors, are expressed in the mouse blastocyst (Refs. 56 and 218 and our unpublished results), and EGF or TGF $\alpha$  has beneficial effects on embryonic development *in vitro* (18). Using genetic and biochemical approaches, the roles of embryonic ErbB1 and/or ErbB4 in interacting with uterine HB-EGF in blastocyst implantation have recently been highlighted in mice (57, 218). HB-EGF is expressed as soluble and transmembrane forms in the uterine luminal epithelium at the site of the blastocyst before the attachment reaction, suggesting paracrine and/or juxtacrine interactions with embryonic ErbBs, as well as autocrine, paracrine, and/or juxtacrine interactions with uterine ErbBs that are expressed in a spatiotemporal manner during the periimplantation period (26, 58, 219). For example, the expression of both ErbB1 and ErbB4 is down-regulated in dormant blastocysts during delayed implantation but is readily up-regulated with blastocyst activation and initiation of implantation (56, 218). Furthermore, whereas a recombinant soluble HB-EGF can promote blastocyst growth and differentiation (26), cells that express the transmembrane form of HB-EGF can adhere to active, but not dormant, blastocysts *in vitro* (57), suggesting paracrine and juxtacrine functions of HB-EGF. In addition, by directing an HB-EGF-toxin conjugate toward wild-type and *erbB1(-/-)* blastocysts, it was shown that HB-EGF could also interact with embryonic ErbB4 and heparan sulfate proteoglycan molecules (218). Collectively, these results suggest that an interaction between uterine HB-EGF and blastocyst ErbBs is important for the attachment reaction. However, the absolute necessity of HB-EGF in implantation requires genetic evidence. A recent report shows that most HB-EGF mutant mice die early in postnatal life due to cardiac defects, precluding critical examination of the implantation phenotype (220). It is also to be noted that early events of implantation do not appear to be affected by blastocysts deficient in either ErbB1 or ErbB4 (221, 222), although the implantation-initiating efficiency of blastocysts deficient in more than one receptor type needs to be tested to delineate the functional redundancy among the receptor family. In conclusion, detailed expression and gene-targeting experiments with all of the ligands and receptors are required to define paracrine, autocrine, and/or juxtacrine roles of specific ligand or its receptors in implantation.

Among many growth factors that have been studied in humans, HB-EGF appears to play a role in implantation and embryonic development. Its expression is maximal during the late secretory phase (cycle d 20–24) when the endome-

trium becomes receptive for implantation (223, 224) and cells expressing the transmembrane form of HB-EGF adhere to human blastocysts displaying cell surface ErbB4 (155). Furthermore, HB-EGF was shown to be one of the most potent growth factors for enhancing the development of human *in vitro* fertilization-derived embryos to blastocysts and subsequent zona hatching (225). Thus, cumulative evidence suggests that HB-EGF has a significant role in preimplantation embryo development and implantation as a paracrine and/or juxtacrine factor in various species.

### E. Signaling by cytokines

The expression of various cytokines and their receptors in the uterus and embryo during early pregnancy suggests their roles in various aspects of implantation (reviewed in Refs. 3, 20, 225, and 226). However, gene-targeting studies show that mice lacking TNF $\alpha$ , IL-1 $\beta$ , IL-1 receptor antagonist, IL-1 receptor type 1, IL-6, and granulocyte/macrophage-colony stimulating factor apparently do not manifest overt reproductive defects (reviewed in Ref. 20). These observations suggest that either these molecules have minor roles in implantation or the loss of one cytokine is compensated by other cytokines with overlapping functions. In contrast, some cytokines are important for normal female fertility (227–229). For example, female *op/op* mice with a naturally occurring mutation of the *M-CSF* gene have markedly impaired fertility (227), and mice with a null mutation of the *Lif* gene encoding leukemia inhibitory factor (LIF) show complete failure of implantation, and blastocysts in these mutant mice undergo dormancy (228, 230). Studies using *IL-11R $\alpha$*  mutant mice have also shown that IL-11 is crucial to decidualization, but not for the attachment reaction (229). Interestingly, both LIF and IL-11 are members of the IL-6 family, which includes IL-6 itself, oncostatin M, ciliary neurotrophic factor, and cardiotrophin (231). LIF and IL-11 bind to ligand-specific receptors, LIFR and IL-11R, respectively, and share gp130 as a signal transduction partner (231), suggesting that gp130 signaling is critically involved in implantation. Although the mechanism underlying implantation and decidualization failures in the absence of LIF still remains to be elucidated, recent evidence shows that there is a loss or an aberrant expression of certain implantation-related genes in pregnant *Lif* mutant mice (232). For example, uterine expression of HB-EGF and *epiregulin* is absent, and *Cox-2* expression is aberrant at the sites of blastocysts in *Lif* mutant mice during the anticipated time of implantation.

LIF and its receptors, LIFR and gp130, exist in both soluble and membrane-bound forms, and soluble forms of these two receptors antagonize the actions of their ligands, implying the complexity of the LIF signaling pathway (233–235). *Lif* is transiently expressed in uterine glands on d 4 of pregnancy in mice, suggesting its role in implantation (236). However, our recent studies show that uterine *Lif* expression is biphasic on d 4. Not only is *Lif* expressed in glands, but it is also expressed in stromal cells surrounding the blastocyst at the time of the attachment reaction (232). This suggests that LIF has dual roles: first in the preparation of the uterus, and later in the attachment reaction. However, the molecular mechanism by which LIF executes its effects on implantation is not



yet known. In this regard, it would be useful to establish the complicated ligand-receptor interactions and detailed expression patterns of LIF receptors that occur during the preimplantation period. However, a recent report shows that inactivation of gp130 by deleting all signal transducers and activators of transcription binding (STAT) sites results in implantation failure (237), reinforcing the importance of LIF signaling in implantation.

The uterine milieu in *Lif* mutant mice fails to induce implantation irrespective of the blastocyst genotypes, since *Lif*(-/-) blastocysts can implant after transfer to wild-type pseudopregnant recipients (228, 230). These reciprocal embryo transfer experiments suggest that maternal LIF is essential for blastocyst implantation. However, a role for this cytokine in embryonic functions cannot be ignored, because *LifR* and *gp130* are expressed at the blastocyst stage, and administration of exogenous LIF improves embryo viability and hatching in several species (238–240). Taken together, these data suggest that both the preimplantation embryo and the uterus are sites of LIF action. However, embryos lacking either *LIFR* or *gp130* develop to the blastocyst stage and implant normally but die during the perinatal period (241, 242). These results raise questions about the role of LIF signaling in preimplantation embryo development.

*Lif* expression in the uterus is maximal around the time of implantation in most species examined, although the steroid hormonal requirements for the preparation of uterine receptivity and implantation differ depending on the species. Whereas uterine *Lif* expression in several species appears to be regulated by P<sub>4</sub> (reviewed in Ref. 242), estrogen regulates *Lif* expression in the mouse uterus. This is evident from *Lif* expression on d 1 of pregnancy and during the estrous stage of the cycle when the uterus is under the influence of estrogen stimulation (236, 243, 244). In addition, *Lif* is not expressed in the uterus during experimentally induced delayed implantation but is rapidly induced by an injection of estrogen (232, 236). However, it has yet to be learned how estrogen induces *Lif* expression in the mouse uterus and the mechanism by which it is regulated by progesterone in other species. In humans, *Lif* is expressed in the endometrium and at higher levels in the glandular epithelium of the secretory endometrium (245). Furthermore, *LIF* deficiency has been associated with unexplained recurrent abortions and infertility in women (246).

#### F. Homeobox genes in implantation

*Hox* genes are transcription factors that belong to a multigene family. They are developmentally regulated and share a common highly conserved sequence element called the *homeobox* that encodes a 61-amino acid helix-turn-helix DNA-binding domain (247). *Hox* genes are organized in four clusters (A, B, C, and D) on four different chromosomes in mice and humans and follow a stringent pattern of spatial and temporal colinearity during embryogenesis (247). Several *Hox* genes at the 5'-end of each cluster are classified as *AbdB-like Hox* genes, because of their homology with the *Drosophila AbdB* gene. In vertebrates, *AbdB-like Hox* genes, similar to their *Drosophila* ortholog, are expressed in developing genitourinary systems (248). For example, *Hoxa-10* and *Hoxa-11*

are highly expressed in developing genitourinary tracts and the adult female reproductive tract, suggesting roles in reproductive events (248–250). *Hoxa-10* mutant mice exhibit oviductal transformation of the proximal one third of the uterus. Furthermore, adult female mice deficient in *Hoxa-10* show failures in blastocyst implantation and decidualization unrelated to the oviductal transformation (248). Subsequent studies revealed that uterine stromal cells in *Hoxa-10*-deficient female mice show reduced proliferation in response to progesterone, leading to decidualization defects (248, 251). The uterus in *Hoxa-11*-deficient mice is hypoplastic and devoid of uterine glands due to developmental defects. Defective proliferation of stromal cells in *Hoxa-10*(-/-) female mice suggests that *Hoxa-10* is involved in the local events of cellular proliferation by regulating cell cycle molecules. Indeed, *cyclin D3* is aberrantly expressed in *Hoxa-10* mutant uteri in response to a decidualizing stimulus (252). Furthermore, because several progesterone-responsive genes are dysregulated in the uterine stroma of *Hoxa-10* mutant mice (251), *Hoxa-10*, as a transcriptional factor, may convey progesterone responsiveness in the uterine stroma by regulating gene expression. A similar, but more severe, phenotype was also noted in *Hoxa-11*-deficient female mice (250).

A recent study using microarray analysis further revealed that the absence of *Hoxa-10* in the uterus in response to progesterone is associated with two cellular disturbances (253). First, among many genes that were up-regulated in the *Hoxa-10*-deficient uteri, two cell cycle molecules, *p15* and *p57*, were notable. These two genes are both cyclin-dependent kinase inhibitors (CKIs), suggesting that the previously observed defect in stromal cell proliferation in *Hoxa-10* mutant mice could be associated with this up-regulation of CKIs. Second, the microarray experiments and follow-up fluorescence activated cell sorter analyses demonstrated that there was hyperproliferation of T lymphocytes in the *Hoxa-10*-deficient uterine stroma in response to progesterone. These results suggest that an aberrant lymphoproliferation has adverse effects on implantation in the *Hoxa-10*-deficient mice. In humans, both *Hoxa-10* and *Hoxa-11* genes are markedly up-regulated in the uterus during the midsecretory phase in steroid hormone-dependent manner (254), suggesting their roles in human implantation.

There is a *homeobox* gene family, unrelated to other larger classes of *homeobox* genes, called the Hmx family of transcription factors. These genes show overlapping expression during development, but gene-targeting experiments have revealed a unique role for Hmx3 in female reproduction (255). *Hmx3* mutant female mice show normal fertilization and preimplantation embryo development to blastocysts. However, the blastocysts fail to implant in the uterus and subsequently die. Because *Hmx3* is primarily expressed in the myometrium during early pregnancy, the mechanism of infertility in these mice is different from that of *Hoxa-10* or *Hoxa-11* mutant mice and has yet to be explored.

#### G. Ligand-dependent nuclear receptors and coactivators in implantation

The nuclear receptor superfamily of transcription factors modulates expression of target genes by binding to specific

DNA elements. The members of this superfamily span from well-characterized steroid hormone receptors to orphan nuclear receptors with no known ligands. Steroid hormone receptors aside, the PPAR family of nuclear receptors has been implicated in female reproductive events. Three members of the PPAR family are PPAR $\alpha$ , PPAR $\gamma$ , and PPAR $\delta$ . To act as a transcriptional activator, PPARs must form a heterodimer with a member of the retinoid X receptor (RXR) subfamily (176, 190). As described below, whereas developmental defects are common in PPAR $\delta$  and PPAR $\gamma$  mutant mice, no apparent reproductive phenotype is evident in PPAR $\alpha$  mutant mice.

1. *PPAR $\delta$ ( $\beta$ )*. PGs can act via dual receptor signaling systems, either via classical cell surface receptors or through nuclear receptor systems. PPARs can respond to a wide variety of ligands including natural and synthetic eicosanoids, fatty acids, and hypolipidemic and hypoglycemic drugs (256). There is evidence that COX-2-derived PGI<sub>2</sub> participates in implantation via activation of PPAR $\delta$  (190), because the implantation defects in *Cox-2*( $-/-$ ) mice are reversible by a PGI<sub>2</sub> agonist or a combination of PPAR $\delta$  and RXR agonists. PGI<sub>2</sub> is the most abundant PG in the early pregnant mouse uterus and is higher at implantation sites than in interim-plantation sites (190). Consistent with the finding that COX-2-driven uterine PG production is crucial to implantation, *Cox-2* and *prostacyclin synthase* (*Pgis*) are coexpressed at the implantation site, suggesting the availability of PGI<sub>2</sub> directly to uterine cells. In searching for a target receptor for PGI<sub>2</sub> in the uterus, the expression of known PGI<sub>2</sub> receptors, such as *IP*, PPAR $\alpha$ , and PPAR $\delta$ , was examined. Among these, PPAR $\delta$  was colocalized at similar regions of the implantation sites with *Cox-2* and *Pgis*; the expression of *IP* and PPAR $\alpha$  was very low to undetectable. The functionality of PPAR $\delta$  as a PGI<sub>2</sub> receptor was further examined *in vivo*, using COX-2-deficient mice as an *in vivo* model. Administration of cPGI or L-165041 (a selective PPAR $\delta$  agonist) to these mice improved implantation and decidualization (190). In conjunction with other *in vitro* evidence, this work suggests that PPAR $\delta$  expressed in the uterine stroma responds to a PGI<sub>2</sub> agonist to mediate embryo implantation (190, 257, 258). Three independent groups have reported diverse phenotypes of PPAR $\delta$  knockout mice (259–261). Because of severe early developmental defects of PPAR $\delta$  mutant embryos, it is very difficult to utilize this model to directly address whether the absence of maternal PPAR $\delta$  affects implantation as in COX-2-deficient mice. Therefore, the conditional knockout mouse model with uterine-specific deletion of PPAR $\delta$  is necessary to address this issue.

2. *PPAR $\gamma$* . PPAR $\gamma$  is well known as a key metabolic regulator participating in obesity control, diabetes, atherosclerosis, and other processes (262). PPAR $\gamma$ -activating ligands include naturally occurring compounds, such as 15-deoxy- $\Delta$  (12, 14)-PGJ<sub>2</sub>, and the thiazolidinedione class of insulin-sensitizing synthetic compounds (262). Whereas the roles of PPAR $\gamma$  in several metabolic processes have been well documented, gene-targeting experiments reveal that PPAR $\gamma$  is also required for normal development of placental, cardiac, and adipose tissues. PPAR $\gamma$  mutant mice die around embryonic

d 10 due to defective terminal differentiation of the trophoblast and placental vascularization (263). Furthermore, in a study using a tissue-specific PPAR $\gamma$  knockout mouse model generated by cross-breeding of mouse mammary tumor virus-cAMP response element and conditional PPAR $\gamma$ -null mice, it was shown that deletion of ovarian PPAR $\gamma$  in female mice led to impaired implantation (264). However, the cause of uterine dysfunction is not due to the absence of uterine PPAR $\gamma$ , because PPAR $\gamma$  was not deleted in the uterus by this cross-breeding. Further study is required to elucidate the underlying mechanism of impaired uterine function in the absence of ovarian PPAR $\gamma$ .

3. *Transcriptional cofactors*. Many transcription factors including nuclear receptors modulate transcription by direct binding to sequence-specific DNA response elements in promoters of target genes, resulting in activation or repression of transcription in a promoter-specific manner (265, 266). Although biological functions and profiles of activating ligands are extremely diverse, ligand-activated nuclear receptors utilize a converging point of transcriptional cofactors to activate/repress downstream target genes (267). Thus, although many cofactors were cloned based on their interaction with a specific nuclear receptor, various studies show a wide range of sharing of cofactors among the family of nuclear receptors (268), supporting the notion of a functional convergence *in vivo*. Because of the promiscuous nature of transcriptional cofactors, they have been extensively studied in relation to various nuclear receptors. Recently, several gene-targeted mouse models demonstrate that many of these cofactors are involved in developmental and reproductive processes.

a. *cAMP response element binding protein (CREB)-binding protein (CBP)/p300*. CBP and the related p300 are called cointegrators because of their many-sided interactions with nuclear receptors, cofactors, and basal transcriptional machinery (268). Thus, as a common limiting cofactor for diverse transcriptional activators and coactivators, CBP apparently organizes multiple signals into an integrated response at promoters containing multiple *cis*-acting elements (268). CBP generally exhibits constant levels of expression in various cell lines and in the developing embryo (269). Furthermore, the gene dosage-dependent role of CBP and p300 is well demonstrated in experiments with knockout mice in that *CBP*( $-/-$ ), *p300*( $-/-$ ), and *CBP*( $+/-$ )*xp300*( $+/-$ ) double heterozygous mice all die *in utero* during midgestation due to multiple developmental defects (269). This suggests an essential role of cointegrators in embryonic development.

b. *Steroid receptor coactivator (SRC)*. The SRC family consists of three members: SRC-1, transcriptional intermediary factor 1 (TIF1) (SRC-2/glucocorticoid receptor interacting protein 1), and p/CIP(SRC-3/AIB1/RAC3/ACTR). The SRC family members interact with a variety of nuclear receptors including ER, PR, and PPAR, indicating their roles in various reproductive functions (270, 271). The three SRC family members share similar properties with respect to interacting with nuclear receptors and transcriptional activity, but it is suggested that these factors exhibit diverse expression patterns and functions (268). Whereas SRC-1-deficient mice are viable

and fertile, they show reduced hormone responsiveness in several target organs, including the uterus, prostate, and testis (272). In contrast, fertility of both male and female *TIF1(-/-)* mice is impaired (273). Female *TIF1(-/-)* mice exhibit increases in embryonic resorption between d 12.5 and 18.5 gestation, possibly resulting from placental hypoplasia. The placental hypoplasia in *TIF1(-/-)* female mice seems to be due to the maternal deficiency of TIF1 in decidual stromal cells. Lastly, *SRC-3(-/-)* mice also exhibit reduced fertility primarily due to decreased ovulation (274). These results suggest that three members of SRC family cofactors play diverse roles in reproductive processes.

*c. PPAR-binding protein (PBP).* PBP was first identified in a yeast two-hybrid screening system as a PPAR $\gamma$  cofactor. This 165-kDa protein was also independently cloned by other groups as vitamin D receptor-interacting protein 205 or thyroid hormone receptor (TR)-associated protein 220, each being a part of a multiunit complex for transcriptional activation by vitamin D receptor or TR, respectively (275, 276). PBP is widely expressed in various mouse tissues and can interact with ER and PPAR (277, 278). Gene-targeting experiments showed that *PBP(-/-)* embryos die *in utero* during midgestation due to poor placental development (279, 280).

*d. PPAR-interacting protein (PRIP)/nuclear receptor-activating protein 250.* PRIP or nuclear receptor-activating protein 250 was identified as a PPAR $\gamma$  or PPAR $\alpha$  cofactor independently (281, 282). PRIP interacts with members of the PPAR, retinoic acid receptor and RXR families, as well as ER and TR. This gene is widely expressed in various tissues including reproductive organs (281, 282), and *PRIP(-/-)* mice exhibit severe developmental defects showing placental and cardiac hypoplasia (283, 284).

*e. Receptor-interacting protein 140 (RIP140).* Two independent groups cloned RIP140 as a cofactor for PPAR $\alpha$  or TR2 (an orphan receptor) (285, 286). This factor actively competes with SRC-1 in transcriptional assays and therefore works as a true transcriptional corepressor (285). RIP140 is involved in female fertility, as demonstrated in gene-targeting experiments (287). *RIP140* mutant female mice show reduced ovulation that leads to small litter size, and a follow-up study showed that uterine function in RIP140-deficient mice is normal (288).

#### H. Cell cycle regulation and signaling in implantation and decidualization

As stated above, the differentiation of the uterus to support embryo development and implantation is primarily directed by progesterone and estrogen (25, 43). Decidualization is first initiated at the antimesometrial site where blastocysts implant. This process, characterized by stromal cell proliferation and differentiation into specialized type of cells (decidual cells) with polyploidy, is critical to the establishment of pregnancy in many species. The mechanisms by which the cell cycle events govern decidualization are poorly understood. The cell cycle is tightly regulated at two checkpoints, the G<sub>1</sub>-S and G<sub>2</sub>-M phases. Normal operation of these phases

involves a complex interplay of cyclins, cyclin-dependent kinases (cdks), and CKIs. At the beginning of decidualization, the stromal cells immediately surrounding the implanting blastocyst proliferate (50). In mice, stromal cells close to the embryo cease to proliferate, initiating the formation of the primary decidual zone (PDZ) later on d 5 of pregnancy; the PDZ is fully established by d 6. However, stromal cell proliferation outside the PDZ continues, eventually forming the secondary decidual zone (SDZ) (30). Under normal conditions, the stimulus for decidualization is the implanting blastocyst. However, a similar process (deciduoma) can be experimentally induced in the pseudopregnant or hormonally prepared rodent uterus by intraluminal infusion of various agents including oil (30). The development of decidua or deciduoma in rodents is associated with the formation of multinucleate and giant cells (289–291). In mice, the decidual cells in the antimesometrial zone are characterized by polyploidy and endoreduplication, and most cells in this zone eventually enlarge, containing nuclei with as much as 64n DNA.

The well-known regulators of mammalian cell proliferation are the three D-type cyclins (D1, D2, and D3), also known as G<sub>1</sub> cyclins (292). The D-type cyclins accumulate during the G<sub>1</sub> phase. Their association with cdk4 or cdk6 is important for forming holoenzymes that facilitate cell entry into the S phase. The retinoblastoma protein (Rb) and its family members, p107 and p130, are negative regulators of the D-type cyclins. Inactivation of these regulators by phosphorylation is dependent on the cyclin/cdk complex activity and allows the cell cycle to progress through the G<sub>1</sub> phase (293). Overexpression of D-type cyclins shortens the G<sub>1</sub> phase and allows rapid entry into S phase (294). In contrast, cyclins A and B are involved in the progression from the S through G<sub>2</sub>-M phase. Binding of cyclin A or cyclin B to cdk1 induces phosphorylation and activation of the complex that is essential to the G<sub>2</sub>-M phase transition, whereas the cyclin A/cdk2 complex participates during progression in the S phase. In general, the action of cdks is constrained by at least two families of CKI, p16 and p21. The p16 family includes p15, p16, p18, and p19, and they inhibit the catalytic partners of D-type cyclins, cdk4 and cdk6. The p21 family consists of p21, p27, and p57, and they inhibit cdks with a broader specificity. CKIs accumulate in quiescent cells, but are down-regulated with the onset of proliferation. Thus, a critical balance between the positive and negative cell cycle regulators is a key decision maker for cell division (295).

The uterus is a unique and dynamic physiological model in which cellular proliferation, differentiation, polyploidization, and apoptosis occur in a spatiotemporal manner during the reproductive cycle and pregnancy. In the human uterus, various cyclins (A, B1, D1, and E) and cyclin-dependent kinases (cdk1, cdk2, and cdk4) and CKI (p27) are regulated during the menstrual cycle or after hormone treatments (57, 58). These molecules are expressed primarily in epithelial and stromal cells during the proliferative phase, suggesting their involvement in rhythmic proliferation of these cells (296). During the secretory phase or after progesterone administration, p27 expression correlates with progesterone-induced growth suppression in endometrial glands and stromal basalis (297). In rodents, however, the uterine expression



of D- and E-type cyclins and cdk2 is regulated by estrogen and/or progesterone in a temporal manner (298–300). Progesterone-dependent growth suppression of the endometrium is considered to be mediated by decreased cdk activity, which presumably occurs via decreased levels of cyclins and increased association of CKI (p27) with cdk2 (301). There is also evidence that progesterone inhibition of uterine epithelial cell proliferation is mediated by the inhibition of nuclear translocation of cyclin D1 and cdk4 in association with the activation of cyclins A- and E-dependent cdk2 activity (302). Cell cycle molecules are also involved in endoreduplication in trophoblast differentiation during placentation (303, 304).

In mice, the expression of cyclin D3 is up-regulated in decidualizing stromal cells at the implantation site and is associated with cell proliferation (252) (305, 306). Furthermore, cyclin D3 is associated with the large polyploid cells that are defined as terminally differentiated stroma. A schematic model, as shown in Fig. 2, illustrates a possible role for cyclin D3 together with other cell cycle molecules in the developmental regulation of stromal cell decidualization and polyploidy. Cyclin D3 generally associates with cdk4 and/or cdk6 for cell proliferation. The coordinate expression of *cdk4* and *cyclin D3* at the site of the embryo after the onset of implantation in mice on d 5 of pregnancy suggests that these regulators play roles in proliferation of stromal cells undergoing decidualization. However, the expression of *p21* with concomitant down-regulation of *cyclin D3* and *cdk4* in the PDZ at the implantation site in the afternoon of d 5 supports the view that cell proliferation activity of *cdk4/cyclin D3* ceases with the development of the PDZ. Their expression in the decidualizing stroma outside the PDZ is again consistent

with their role in proliferation of the stroma at the SDZ. In contrast, down-regulation of *cdk4* in the SDZ with persistent expression of *p21* on d 6 of pregnancy perhaps directs differentiation of stromal cells in this zone. On this day of pregnancy, a switch from *cdk4* to *cdk6* with continued expression of *cyclin D3* and *p21* in stromal cells within the SDZ is noted in polyploid decidual cells. The presence of cyclin E, cyclin A, and cdk2 with concomitant down-regulation of cyclin B and cdk1 in these cells supports the view that these cells are following the endocycle pathway.

The physiological significance of stromal cell polyploidy during decidualization is still unclear. The life span of decidual cells during pregnancy is limited, and their demise makes room for the rapidly growing embryo. Because most decidual cells become polyploid during their lifetime, it is speculated that polyploidy limits the life span of decidual cells. Furthermore, one of many uterine functions is to support embryonic growth that requires increased protein synthesis by decidual cells. The developing polyploidy may ensure increased synthetic capacity by increasing the number of gene copies for transcription. In conclusion, a tight coordination of the cell cycle molecules appears to be critical for uterine cell proliferation and differentiation during implantation and decidualization.

#### I. Matrix remodeling and angiogenesis during implantation and decidualization

Tissue remodeling and angiogenesis are two hallmark events during implantation and decidualization. The changing endocrine state of the female during the reproductive

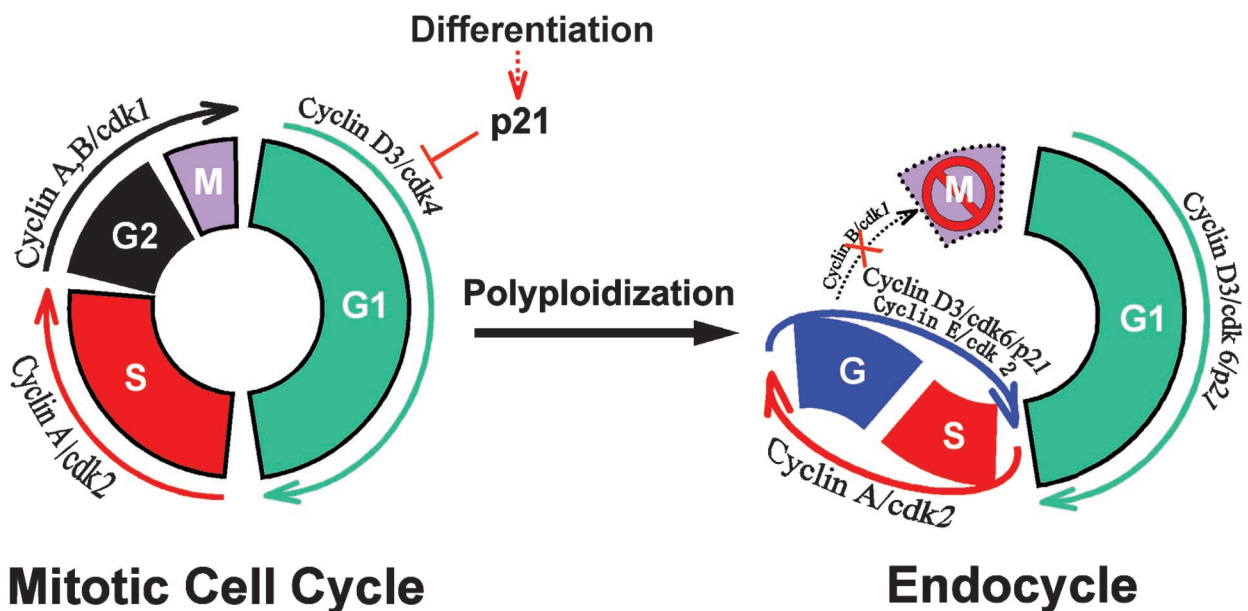

FIG. 2. A proposed model of stromal cell polyploidy and decidualization. The phase-specific cell cycle regulators in the G<sub>1</sub> phase (cyclin D3, p21, cdk4, cdk6, cyclin E, and cdk2) or in the S-G<sub>2</sub>-M phases (cyclin A, cyclin B, cdk1, and cdk2) are shown with respect to their association in mitotic cell cycle vs. endocycle. The coordinate regulation of cyclin D3 and cdk4 in decidualizing stromal cells suggests that these regulators play roles in proliferation. However, the expression of p21 with concomitant down-regulation of cyclin D3 and cdk4 supports the view that cell proliferation ceases with the development of the PDZ. Furthermore, a switch from cdk4 to cdk6 with sustained expression of cyclin D3 and p21 in cells within the SDZ is consistent with the progression through the G phase for the onset of endocycle. This is further supported by the expression of cyclin E, cyclin A, and cdk2 in the polyploid cells for successful progression in G and S phases of the endocycle pathway. The absence of cyclin B and cdk1 probably plays a role to initiate the first endocycle.

cycle and pregnancy results in extensive remodeling in the uterine tissue (139, 307). For example, various basement membrane components, such as type IV collagen, laminin, fibronectin, and proteoglycans, in the human uterus undergo changes throughout the menstrual cycle and pregnancy (307). Likewise, the ECM components undergo remodeling during mouse uterine stromal cell decidualization (139). Matrix metalloproteinases (MMPs) and tissue inhibitors of MMPs (TIMPs) are thought to be key mediators for matrix degradation during implantation and decidualization (reviewed in Refs. 307–309). There is evidence that a balance between a select set of MMPs and TIMPs is important for implantation. Mechanisms regulating the MMP and TIMP genes during the periimplantation period are not clear, although growth factors and cytokines including the EGF and TGF $\beta$  family members and LIF have been shown to modulate MMPs and TIMPs (reviewed in Ref. 309).

Under physiological conditions, angiogenesis, the process by which new blood vessels develop from preexisting vessels, primarily occurs in the uterus and ovary of the adult during the reproductive cycle and pregnancy (310). Indeed, increased vascular permeability and angiogenesis are crucial to successful implantation, decidualization, and placentation

(Fig. 3). A number of studies provided indirect and descriptive evidence for the potential roles of estrogen and progesterone in these processes in various species (reviewed in Refs. 310–312). These studies primarily examined the changes in the whole uterus of the expression of a number of gene products known to regulate vascular permeability and angiogenesis, including VEGF and its receptors, without investigating its angiogenic status. Thus, *in vivo* roles for estrogen and progesterone in uterine angiogenesis are not fully appreciated. VEGF, originally discovered as a vascular permeability factor (reviewed in Ref. 313), is also a potent mitogen for endothelial cells and a key regulatory growth factor for vasculogenesis and angiogenesis (314). Targeted disruption of even one allele of the *Vegf* gene results in embryonic death *in utero* during midgestation with aberrant blood vessel formation (315, 316). Differential splicing of the *Vegf* gene generates several VEGF isoforms in both humans and mice; VEGF<sub>121</sub> and VEGF<sub>165</sub> are the predominant isoforms in humans, whereas VEGF<sub>120</sub> and VEGF<sub>164</sub> are the most abundant isoforms in mice (311, 317).

VEGF effects are primarily mediated by two tyrosine kinase receptors: VEGFR1 [fms-like tyrosine kinase 1 (FLT1)] and VEGFR2 [fetal liver kinase 1 (FLK1)/kinase insert

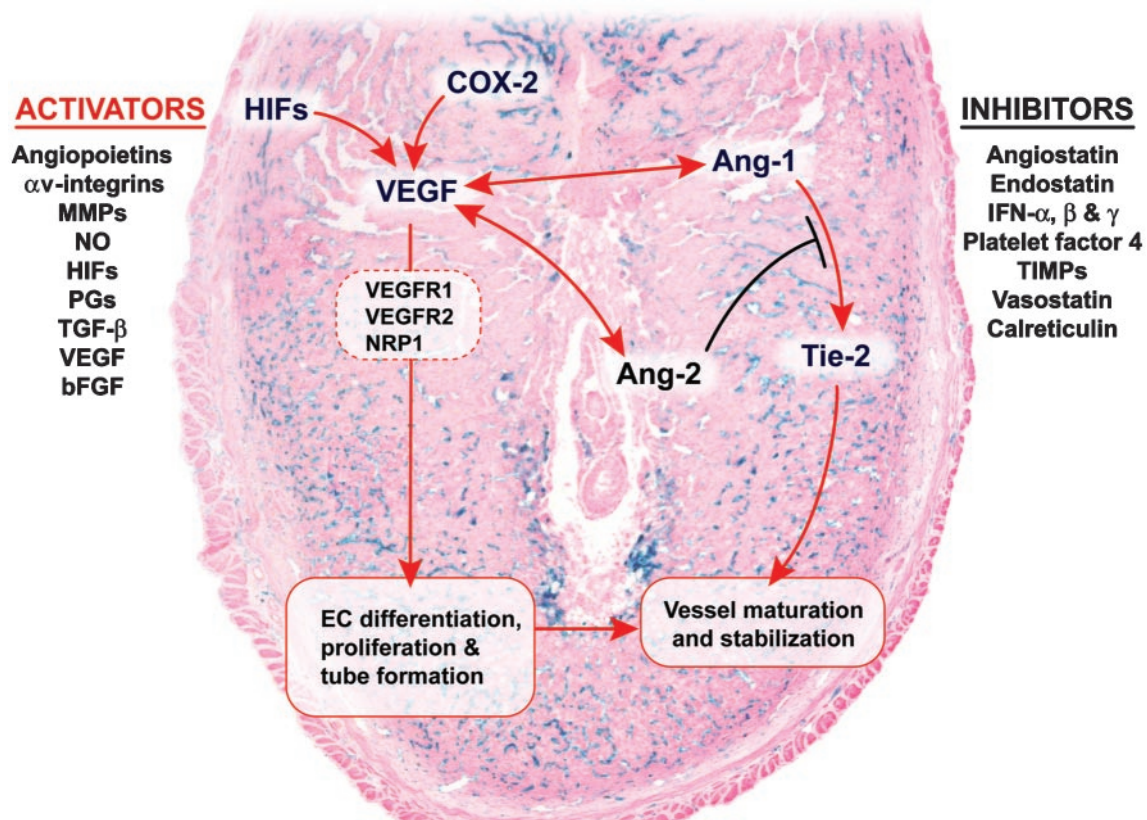

FIG. 3. A scheme showing angiogenic signaling in the uterus during implantation. Increased vascular permeability and angiogenesis at the site of the blastocyst are two hallmarks of the implantation process. The proangiogenic factor VEGF and its receptor Flt1 (VEGFR1) and Flk1 (VEGFR2) are primarily important for uterine vascular permeability and angiogenesis before and during the attachment phase of the implantation process, whereas VEGF in complementation with the angiopoietins (Ang1 and Ang2) and their receptor Tie-2 directs angiogenesis during decidualization and primarily target the VEGF, but not the angiopoietin, system. Ang1 in collaboration with VEGF induces vessel maturation and maintains vessel leakiness, whereas Ang2 induces vessel destabilization required for further sprouting in the presence of VEGF. Flk1<sup>lacZ</sup> mice were used to study angiogenesis during implantation. LacZ-stained (blue) blood vessels are shown at the implantation site on 8 of pregnancy. EC, Endothelial cells; NO, nitric oxide; bFGF, basic FGF; IFN- $\alpha$ , interferon  $\alpha$ .

domain-containing receptor (KDR)] (318–321). Although FLT1 activation does not stimulate endothelial cell mitosis, targeted disruption of the *Flt1* gene produces impaired endothelial cell assembly into blood vessels and embryonic lethality (322). FLK1 is the major transducer of VEGF signals that induce chemotaxis, actin reorganization, and proliferation of endothelial cells (314, 323, 324). Targeted deletion of the *Flk1* gene in mice produces defects in hematopoietic and endothelial cell development leading to embryonic death by d 9.5 (325). Recently, another multifunctional VEGF receptor has been identified as Neuropilin-1 (NRP1). NRP1 was originally described as a neuronal transmembrane receptor that participates in axonal guidance in the developing nervous system (326, 327) and is a receptor for the collapsin/semaphorin family of proteins (328, 329). It is now known that NRP1 functions as a receptor for at least five different ligands, collapsin-1/semaphorin-III/D, semaphorin-E, semaphorin-IV, VEGF<sub>165</sub>, and placental growth factor (PlGF), which are involved in different biological processes, such as nervous system development, vasculogenesis, and angiogenesis (329, 330). *NRP1* is expressed in human endothelial cells as a VEGF<sub>165</sub>-specific receptor. When coexpressed in endothelial cells with FLK1, NRP1 enhances the binding of VEGF<sub>165</sub> to FLK1 and VEGF<sub>165</sub>-mediated chemotaxis several-fold higher than that of FLK1 alone (331). Conversely, inhibition of VEGF<sub>165</sub> binding to NRP1 inhibits its binding to FLK1 and its mitogenic activity in endothelial cells. *NRP1*-deficient mice show peripheral nervous system abnormalities and die in midgestation due to yolk sac vascular insufficiency and developmental anomalies of the cardiovascular system (332). Mice overexpressing *NRP1* also show cardiovascular abnormalities including increased number of blood vessels and abnormal hearts (333). Several structurally similar VEGF family members including PlGF, VEGF-B, VEGF-C, and other VEGF-related proteins have recently been identified, and they are distinct gene products. VEGF-C and PlGF can bind to FLK1 and FLT1, respectively. VEGF-C can also interact with a third structurally related tyrosine kinase receptor, FLT4 (reviewed in Ref. 312). Definitive physiological significance of these newly identified VEGF-related growth factors in uterine angiogenesis during implantation warrants further investigation.

We have recently shown that the genes encoding murine VEGF isoforms and their receptors, FLT1, FLK1, and NRP1, are differentially expressed in the mouse uterus in a spatiotemporal manner during implantation and that the predominant VEGF<sub>164</sub> isoform interacts with FLK1 and NRP1 (311, 312). These results suggest that the VEGF system is important for uterine vascular permeability and angiogenesis during implantation. Others have also shown the expression of VEGF and its receptors in the uterus as a whole during pregnancy and in response to steroid hormones (313). For example, estrogen rapidly induces uterine vascular permeability and *Vegf* expression transcriptionally via nuclear ER (313), and the *Vegf* gene contains *EREs* (334). Progesterone also up-regulates uterine *Vegf* expression via activation of the nuclear PR but at a slower rate (334). Because estrogen rapidly stimulates uterine vascular permeability and *Vegf* expression, and because vascular permeability is considered a prerequisite for angiogenesis, it is widely believed that es-

trogen is a potent stimulator of uterine angiogenesis during normal reproductive processes *in vivo*. However, recent evidence using molecular, genetic, physiological, and pharmacological approaches shows that estrogen and progesterone have different effects *in vivo*; estrogen promotes uterine vascular permeability but profoundly inhibits angiogenesis, whereas progesterone stimulates angiogenesis with little effect on vascular permeability. These effects of estrogen and progesterone are mediated by differential spatiotemporal expression of proangiogenic factors in the uterus (335).

VEGF effects are complemented and coordinated by another class of angiogenic factors, the angiopoietins (336). VEGF acts during the early stages of vessel development (315, 316, 325), whereas angiopoietin-1 (Ang1) acts later to promote angiogenic remodeling, including vessel maturation, stabilization, and leakiness (337–339). In contrast to agonistic functions of Ang1, Ang2 behaves as an antagonist. Thus, Ang1 and Ang2 are naturally occurring positive and negative regulators of angiogenesis, respectively. They interact with an endothelial cell-specific tyrosine kinase receptor Tie2 (340). Two additional members of the angiopoietin family have been identified recently. Ang3, which is expressed in mice, appears to function as an antagonist to Ang1 activation of Tie2 in a fashion similar to Ang2 (341). In contrast, Ang4, the human counterpart of Ang3, functions as an agonist to Tie2 (341). However, definitive biological functions of Ang3 and Ang4 remain unclear. Our recent investigation shows that whereas VEGF and its receptor Flk1 are primarily important for uterine vascular permeability and angiogenesis before and during the attachment phase of the implantation process, VEGF together with the angiopoietins and their receptor Tie2 directs angiogenesis during decidualization after implantation (342). A recent report has shown that Ang2 is required for postnatal angiogenic remodeling, and Ang2 in collaboration with VEGF participates in the development of lymphatic vasculature (343).

PGs, because of their roles in angiogenesis, cell proliferation, and differentiation in other systems, are also likely to participate in uterine vascular permeability and angiogenesis during implantation and decidualization. Indeed, there is now genetic and molecular evidence that COX-2-derived PGs participate in uterine angiogenesis during implantation and decidualization (342). Thus, one cause of failure of implantation and decidualization in *Cox-2*( $-/-$ ) mice is the deregulated vascular events in the absence of COX-2. The attenuation of uterine angiogenesis in these mice is primarily due to defective VEGF signaling rather than the angiopoietin system. Collectively, the results provide evidence that whereas ovarian steroid hormones influence uterine vascular permeability and angiogenesis during the preimplantation period, COX-2-derived PGs direct these events during implantation and decidualization by differentially regulating VEGF and angiopoietin signaling (335, 342).

Oxygen homeostasis is essential for cell survival and is primarily mediated by hypoxia-inducible factors (HIFs). These factors are intimately associated with vascular events and induce *Vegf* expression by binding to the *hypoxia response element* in the *Vegf* promoter. HIF $\alpha$  isoforms function by forming heterodimers with the aryl hydrocarbon nuclear translocator (ARNT) (HIF- $\beta$ ) family members. There is very



limited information on the relationship among HIFs, ARNTs, and VEGF in the uterus during early pregnancy, although roles of HIFs in regulating VEGF and angiogenesis in cancers and vasculogenesis during embryogenesis are well documented (344). Using molecular and physiological approaches, we have recently shown that uterine expression of HIFs and ARNTs does not correlate with *Vegf* expression during the preimplantation period (d 1–4) in mice. In contrast, their expression follows the localization of uterine *Vegf* expression with increasing angiogenesis during the postimplantation period (d 5–8). This disparate pattern of uterine HIFs, ARNTs, and *Vegf* expression on d 1–4 of pregnancy suggests that HIFs have multiple roles in addition to the regulation of angiogenesis during the periimplantation period. Using pharmacological, molecular, and genetic approaches, we also observed a novel finding that whereas progesterone primarily up-regulates uterine *HIF-1 $\alpha$*  expression, estrogen transiently stimulates that of *HIF-2 $\alpha$*  (345). The definitive role of hypoxia in uterine angiogenesis warrants further investigation.

## VII. Emerging Concepts

### A. Endocannabinoid signaling in implantation

Psychoactive cannabinoids are active components of marijuana that work via activation of the G protein-coupled cell surface receptors, CB1 and CB2 (346, 347). The discovery of cannabinoid receptors led to the identification of endogenous cannabinoid ligands, arachidonylethanolamide (anandamide) and 2-arachidonoylglycerol (2-AG) (348, 349). The mouse uterus synthesizes anandamide, and the levels fluctuate in the uterus during early pregnancy coincident with the window of uterine receptivity for implantation (350). Thus, anandamide levels were found to be lower in the receptive uterus and at the implantation sites, but were higher in the nonreceptive uterus and at interimplantation sites (350). The progesterone-treated delayed implanting uterus also showed elevated levels of anandamide, but the levels were down-regulated with the termination of the delayed implantation by estrogen (60). Experiments using *Lif*(–/–) pregnant mice also supported this finding, because these mice with implantation failure had higher uterine levels of anandamide than those of wild-type mice (60). Therefore, a correlation between the levels of anandamide and phases of uterine receptivity suggests that endocannabinoid ligand-receptor signaling is an important aspect of defining the window of uterine receptivity for implantation (350). There is experimental evidence that ligand-receptor signaling with cannabinoids directs preimplantation embryo development and implantation. This is consistent with the observation that mouse blastocysts express CB1 (351). CB1 is expressed from the two-cell stage at the time of zygotic gene expression through the blastocyst stage (351). Embryonic CB1 is functional, because two-cell embryos cultured in the presence of natural, synthetic, and endocannabinoids fail to develop to the blastocyst stage, and this failure occurs between the eight-cell and blastocyst stages. This effect is reversed by a CB1-selective antagonist (352). Furthermore, the endocannabinoid anandamide at a low concentration stim-

ulates blastocyst differentiation and trophoblast outgrowth, whereas at higher concentrations it inhibits these events via differential regulation of MAPK and Ca<sup>2+</sup> signaling (353, 354). These results suggest that a narrow range of cannabinoid concentrations regulate the embryonic developmental program.

We speculate that a tightly regulated level of uterine anandamide and embryonic CB1 during early pregnancy is important for preimplantation embryonic development and implantation. This speculation is consistent with our recent observations of asynchronous preimplantation embryo development in *CB* mutant mice, and inhibition of implantation in wild-type mice, but not in *CB1*(–/–) × *CB2*(–/–) double-mutant mice, with experimentally induced sustained levels of exogenously administered cannabinoids (60). Collectively, the expression of cannabinoid receptors in the preimplantation mouse embryo, synthesis of anandamide in the uterus, and the dose- and stage-specific effects of anandamide on embryo development and implantation suggest that ligand-receptor signaling with endocannabinoids or cannabinoid agonists is important for these events. The observation that heightened levels of cannabinoids inhibit implantation in mice subsequently led to the discovery that elevated levels of anandamide induce spontaneous pregnancy losses in women (355, 356). Thus, regulated cannabinoid signaling perhaps functions as a physiological surveillance system that assures implantation of healthy, but not abnormal, embryos resulting from aberrant expression of CB1 or their exposure to aberrant levels of endogenous or exogenous cannabinoids (Fig. 4). The present observation identifies unique biological functions of cannabinoid signaling for a very fundamental process that determines the survival or demise of a developing embryo.

### B. Developmental genes in implantation

The intricate cross-talk between the blastocyst and uterus during implantation has several features of the reciprocal epithelial-mesenchymal interactions during embryogenesis and involves evolutionarily conserved signaling pathways. An emerging concept is that many of these evolutionary conserved genes, including those encoding FGFs, IGFs, bone morphogenetic proteins (BMPs), Wnts, Noggin, Indian hedgehog (IHH) proteins, and their receptors, are potential players in the process of implantation and embryo spacing in the uterus (52) (Fig. 1). These genes are expressed in the uterus in a spatiotemporal manner during the periimplantation period in mice. For example, the attachment reaction is associated with a localized stromal induction of genes encoding BMP-2, FGF-2, and WNT-4. A simple *in vitro* model of implantation is not yet available to examine either the hierarchy of the events elicited in the uterus by the embryo or the function of individual signaling proteins. These questions were addressed by selectively delivering factors via blastocyst-sized gelatin beads in the uterine lumen to provoke implantation-like reactions with correct gene expression similar to what is generated by living embryos during normal implantation. We observed that beads soaked in HB-EGF or IGF-I, but not other proteins, induce many of the same discrete local responses elicited by the blastocyst, including

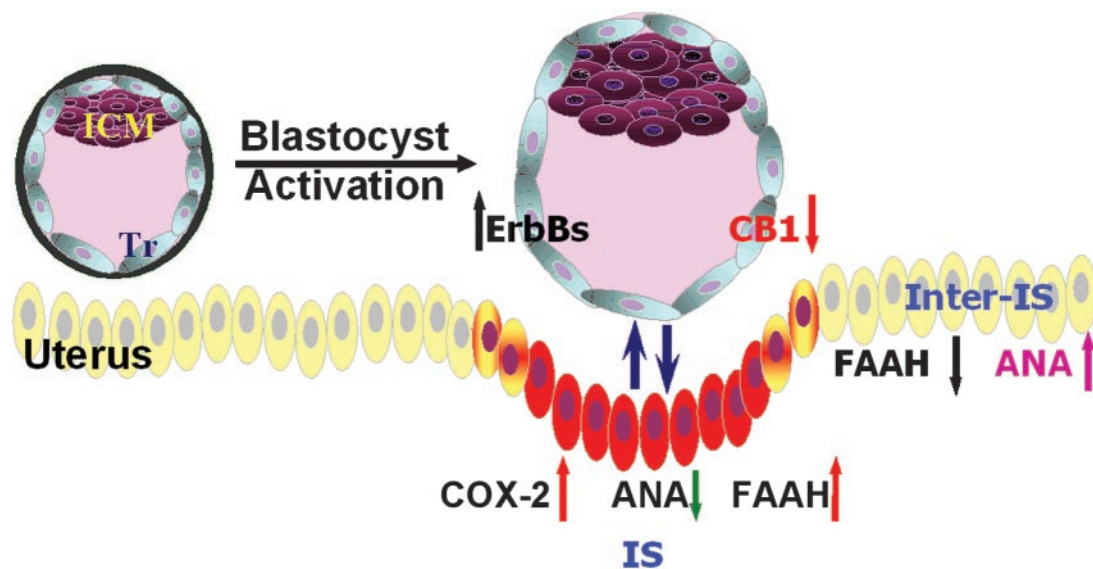

FIG. 4. A schematic diagram showing potential endocannabinoid signaling in blastocyst activation and implantation. Anandamide and 2-AG are the major endocannabinoids that interact with G protein-coupled cannabinoid receptors, CB1 and CB2. Regulated levels of endocannabinoids in the receptive uterus and CB1 in activated blastocysts at the time of implantation are beneficial for implantation, whereas higher levels are detrimental to this process. Because COX-2 is expressed in the uterus at the site of implantation and because anandamide and 2-AG can serve as substrates for either COX-2 or FAAH, the proposal suggests that uterine endocannabinoids are tightly regulated by the coordinated activity of FAAH and COX-2 in the uterus during early pregnancy. Evidence suggests that regulated uterine levels of endocannabinoids and blastocyst CB1 play a physiological role in synchronizing blastocyst competency with uterine receptivity for implantation. Tr, Trophectoderm; ANA, anandamide; CB1, brain-type cannabinoid receptor; FAAH, fatty acid amide hydrolase; IS, implantation site; Inter-IS, interimplantation site.

increased localized vascular permeability, decidualization, and expression of *Bmp-2* and COX-2 at the sites of the beads (4, 52). Furthermore, beads containing BMP-2 do not themselves produce an implantation-like response but alter the spacing of implantation sites induced by blastocysts cotransferred with the beads (52).

Genes encoding the components of the hedgehog-signaling pathway, namely IHH, the multipass transmembrane HH-binding protein/receptor, PATCHED (PTC), and the transcription factors, GLI 1, -2, and -3 (357–359) are expressed in a dynamic temporal and spatial pattern during the preparation of the uterus for implantation (360). The expression of *Ihh* increases in the luminal epithelium and glands from d 3, reaching high levels on d 4. During the same time, the expression of *Ptc*, *Gli1*, and *Gli2* is up-regulated in the underlying mesenchymal stroma. Transcription of *Ihh* in ovariectomized mice is induced by progesterone but not by estrogen. Lower induction of *Ihh*, *Ptc*, and *Hoxa-10* is also observed in response to progesterone treatment in the uteri of PR mutant mice lacking the progesterone nuclear steroid receptor. This finding suggests that this hormone regulates *Ihh* via both nuclear receptor-dependent and -independent pathways. Furthermore, in uterine explant cultures, recombinant N-SHH (Sonic hedgehog with N-terminal acylation) protein stimulates the proliferation of mesenchymal cells and the expression of *noggin*. These findings suggest that IHH generated by the epithelium functions as a paracrine growth factor for stromal cells during the early stages of pregnancy (360). Progesterone regulation of *Ihh* expression in the mouse uterus has recently been confirmed by another group of investigators (361). Research involving the genes known to be involved in developmental processes in the field of im-

plantation biology is in its infancy and needs to be pursued more vigorously.

### C. Discovery of novel implantation-related genes

The identification and characterization of molecules involved in embryo implantation have relied historically on candidate gene approaches with a requirement for knowledge of gene structure or sequence. Exceptions to this include the use of subtractive hybridization, representational difference analysis, and similar techniques (362–366). These approaches have identified a number of implantation-related genes in uteri of rodents and primates including humans, but these studies did not provide information on the expression profile of large gene families. Another approach is to modify unknown genes by insertion of transgenic markers or by chemical inactivation. These large-scale mutagenesis screens offer the ability to randomly inactivate genes throughout the genome and detect sought-after phenotypic changes, such as infertility. Although this approach does not address the expression of multiple genes, it does lead to recognition of important molecules without prior information on gene identity or structure. Unfortunately, there are no mutagenic studies that have identified genes implicated in implantation. Differential display (DDRT-PCR) and serial analysis of gene expression (SAGE) are RT-PCR-based methods that do not require advance knowledge of genetic sequence information. Although there are no published reports that used the SAGE technique to identify implantation-related genes, expression studies using DDRT-PCR have identified a small number of interesting genes that are differentially expressed in the uterus during the periimplantation period (252, 362,

367–372). The DDRT-PCR technique identified a large number of differentially expressed RT-PCR products that are candidates for further evaluation. To date, none of the study designs using DDRT-PCR to examine the implantation process overlap, so the comparison of their results shows little similarities.

The advent of cDNA microarray technology and sequencing of the mouse and human genomes have led to approaches for global analysis of implantation-related genes. Gene array and SAGE results are comparable (373, 374). Neither method requires prior knowledge of gene sequence, and both provide a read-out on the expression profile of a significant segment of the genome at any given time point or under any experimental condition. A series of uterine gene array studies have produced a large number of implantation-specific candidate genes. In animal models, gene arrays have been used to identify genes that show differential expression at implantation *vs.* interimplantation sites (375), implantation *vs.* postimplantation periods (376), or genes that are differentially regulated by changes in estrogen and progesterone signaling (253, 361, 377–381). We compared the results of implantation *vs.* interimplantation arrays to the results of progesterone-treated (delayed implantation) uteri *vs.* estrogen-stimulated (termination of delayed implantation) uteri

to find genes that may be important for implantation. The combined strategy identified a number of genes with previously recognized roles in implantation, confirming the validity of this approach. Among genes that had decreased expression at the implantation site and during progesterone-induced delay, we found a marked shift in the expression of immune-related genes, suggesting active modification of the host immune response to the implanting blastocyst at an early stage. A recent microarray analysis examining the uterine response to progesterone identified a similar subset of Ig-family genes (253). This study identified 1675 progesterone-induced genes that were grouped into 18 unique patterns of progesterone responsiveness. About one half (750 genes) of these genes were also detected by our combined array analyses. Other microarray studies have used PR-deficient mice (361) and RU-486-treated mice (377) to identify novel progesterone-mediated pathways during implantation. After comparing and analyzing the results available for each of these disparate approaches, we selected a subset of genes that are commonly expressed in the mouse uterus under varying periimplantation-like conditions (Table 1). Closer examination of these genes and comparison of results from similar microarray experiments may provide clues to

TABLE 1. Identification of implantation-related genes in the mouse

| Progesterone-responsive                | Estrogen-responsive                                             |                                                |
|----------------------------------------|-----------------------------------------------------------------|------------------------------------------------|
|                                        | Up-regulated                                                    | Down-regulated                                 |
| Alkaline phosphatase                   | Arachidonate 15-lipoxygenase                                    | BM-90/fibulin                                  |
| Amphiregulin                           | ATFx                                                            | EIG 180 (ethanol-induced gene)                 |
| Apg-2 (chaperone)                      | Cytosolic adenylate kinase                                      | Glutathione S-transferase, $\theta$ -2         |
| Carbonic anhydrase II                  | GADD45 protein                                                  | Hereditary hemochromatosis-like protein        |
| Cathepsin F                            | Glutamyl-tRNA synthetase                                        | Hoxd4                                          |
| CCAAT/enhancer binding protein $\beta$ | Guanine nucleotide regulatory protein                           | HS1-binding protein 3                          |
| Chondroitin sulfate proteoglycan 2     | Heat shock protein, 105 kDa                                     | Intracisternal A particles                     |
| Claudin-7                              | Hexokinase II, exon 1                                           | Leptin receptor                                |
| Complement C1q B chain                 | IL-1 receptor, type 11                                          | Norrie disease homolog                         |
| Cyclin-dependent kinase inhibitor 1C   | Mitochondrial stress-70 protein                                 | P glycoprotein 3                               |
| Dickkopf-3                             | NAD-dependent methylenetetrahydrofolate dimethyl cyclohydrolase | Ras-related protein (DEXRAS1)                  |
| Follistatin                            | NM23 metastatic-associated protein                              | Thioether S-methyltransferase                  |
| Glutathione-S-transferase              | Nuclear autoantigenic sperm protein                             | Xeroderma pigmentosum, complementation group C |
| Histidine decarboxylase                | p45 MAPK kinase                                                 |                                                |
| Hoxa 11                                | Procollagen, type VI, $\alpha$ 2                                |                                                |
| IGF binding protein-3                  | Protein kinase inhibitor p58                                    |                                                |
| IL-13 receptor, 2                      | RAB geranylgeranyl transferase                                  |                                                |
| Keratin complex 1                      | RAMP3                                                           |                                                |
| Lactotransferrin                       | Ran GTPase                                                      |                                                |
| Leukocyte 12/15 lipoxygenase           | RAN GTPase-activating protein 1                                 |                                                |
| LRG-21                                 | RNase L inhibitor (Mu-RLI)                                      |                                                |
| Membrane metalloendopeptidase          | Small proline-rich protein 2F                                   |                                                |
| Metallothionein 1                      | Splicing factor, arginine/serine-rich 10                        |                                                |
| Norrie disease homolog                 | Squalene epoxidase                                              |                                                |
| Osteoblast-specific factor 2           | Squalene synthase                                               |                                                |
| Peptidylarginine deiminase             | Type VI collagen, $\alpha$ 3                                    |                                                |
| Procollagen type V 2                   |                                                                 |                                                |
| Procollagen type XV                    |                                                                 |                                                |
| Ras-like GTP-binding protein Rem       |                                                                 |                                                |
| Small proline-rich protein 2F          |                                                                 |                                                |
| Snail homolog                          |                                                                 |                                                |
| Spermidine synthase                    |                                                                 |                                                |
| Squalene synthase                      |                                                                 |                                                |
| Tissue factor pathway inhibitor        |                                                                 |                                                |

The results of different mouse uterine microarray experiments were compared to identify commonly detected genes. Progesterone-responsive genes were pooled from several disparate approaches (253, 375, 377), whereas estrogen-induced genes were grouped by their response pattern (375, 379).



the identity of important genes or gene families in the implantation process.

In humans, microarray technology has been used to examine uterine cell lines and explant cultures under conditions that simulate the periimplantation period (371, 382, 383). A more physiological application is based on estimates of the putative window of receptivity in women. Endometrial biopsies taken before and during this period have identified significant changes in a modest number of genes that may serve as markers for uterine receptivity in humans. Although some variation exists in their methods, two independent studies used the same microarray platforms for their analysis (384, 385). A comparison of the results shows differential regulation of a small number of genes around the time of uterine receptivity for implantation (Table 2). Interestingly, there are a number of these genes that are also differentially expressed in mouse models of implantation and uterine receptivity.

In addition to gene expression screening, numerous approaches have been taken to identify novel proteins that may be important for implantation. Overall uterine protein synthesis increases around the time of implantation and during artificially induced decidualization (386). The presence of unique proteins in implantation or decidual tissues was originally detected by immunological and radiolabeling experiments (387–390). Two-dimensional gel electrophoresis has improved the ability to detect implantation-related proteins (391–395). Currently, emerging techniques in proteomics have also led to applications in uterine biology (396–398) and will likely resolve the presence and function of novel implantation-specific molecules.

### VIII. Perspectives and Future Directions

Infertility and rapid population growth are two pressing global reproductive health issues. Events of preimplantation embryo development and uterine preparation for implanta-

tion are two major determinants of these concerns. Basic and clinical research to better understand these events will help alleviate problems of female infertility, improve fertility regulation in women, and lead to the development of new and improved contraceptive methods. Interactions between the heterogeneous cell types of the uterus and embryo in relation to endocrine, paracrine, juxtacrine, and autocrine factors during implantation are extremely complex (4). Thus, exploring and defining the molecular road map during the critical time of implantation necessitates well-thought out experimental designs in the context of both embryonic and uterine contributions to formulate a more meaningful blueprint. The objectives are not easily achievable in the human due to experimental difficulties, ethical considerations, and current restrictions on research with human embryos. Therefore, various animal models will continue to be used for studying embryo-uterine interactions during implantation. This may have relevance to human implantation. In addition, efforts should be directed to establish reliable *in vitro* systems, which are not currently available, to study implantation. However, experiments using endometrial biopsy samples to identify molecules associated with human uterine receptivity (window of implantation) during the menstrual cycle with changing estrogen and progesterone levels should continue to be pursued to obtain a better insight into human implantation.

Although a wealth of knowledge on the roles of growth factors, cytokines, homeotic genes, transcription factors, and lipid mediators in embryo-uterine interactions during implantation has been generated, their hierarchical blueprint in directing uterine and embryonic function during implantation remains to be deciphered. An arduous task before us is to unravel the intricate nature of the signaling pathways in implantation. We need to understand whether these pathways function independently, in parallel, or converge to a common signaling pathway to establish the network of cross-talk between the embryo and uterus that is necessary for implantation. Gene-targeting experiments in mice have iden-

TABLE 2. Identification of implantation-related genes in women

| Up-regulated genes               | Down-regulated genes                               |
|----------------------------------|----------------------------------------------------|
| Annexin II                       | AF1q                                               |
| ApoD                             | Autotaxin                                          |
| Dickkopf-1 (hdck-1)              | CAP2 adenylyl cyclase-associated protein           |
| H2B/g                            | Centromere protein-A (CENP-A)                      |
| hCPE-R                           | Chromosome 1-specific transcript                   |
| ID4 DNA-binding protein          | Cyclin B                                           |
| IL-15                            | Dipeptidyl aminopeptidase-like protein             |
| IL-15 precursor                  | Endothelin 3 (EDN3)                                |
| Igλ gene locus                   | Fibroblast activation protein                      |
| Mammaglobin                      | Frizzled-related protein frpHE                     |
| Metallothionein-IG (MTIG)        | GLI protein                                        |
| NKG5 NK and T cell-specific gene | hFEN1                                              |
| Osteopontin                      | Matrilysin                                         |
| Pyruvate carboxylase             | Midline 1 fetal kidney isoform 3 (MID1)            |
| TGFβ superfamily protein         | MSX-2                                              |
|                                  | Neuronal olfactomedin-related ER localized protein |
|                                  | RA-binding protein II (CRABP-II)                   |
|                                  | Serine/threonine kinase (STK-1)                    |
|                                  | TRAIL receptor 2                                   |

The results of two different human uterine microarray experiments were compared to identify commonly detected genes (384, 385). The objective of these two studies was to identify genes that are differentially expressed between pre-receptive and receptive phases during the window of uterine receptivity for human implantation. Despite similarities in their approach, only a few genes were found to have common patterns of regulation during the putative window of human implantation. ApoD, Apolipoprotein D.

tified a large number of genes that are important for female fertility; reproductive phenotypes of a select number of gene mutations are shown in Table 3. This list is not exhaustive and is likely to expand enormously with emergence of the rapidly evolving new technologies and results. Although some molecules involved in defining the pathways regulating implantation have been identified, our understanding of the implantation process is still far from complete. For example, many of the genes that are expressed in an implantation-specific manner and appear to be important for im-

plantation cannot be studied in depth because deletion of these genes results in embryonic lethality. Uterine- or embryo-specific conditional knockout of genes of interest is urgently needed to better understand the definitive roles of these genes in uterine biology and implantation. Our failure to identify suitable uterine cell-specific promoters has been a hindrance to the achievement of this objective. One difficulty in identifying the critical roles of signaling molecules within a gene family is the redundant or compensatory functions of the gene products within the family.

TABLE 3. Female reproductive performances in gene-targeted mouse models

| Gene                                                   | Phenotype                                                                                                                                               | Ref.          |
|--------------------------------------------------------|---------------------------------------------------------------------------------------------------------------------------------------------------------|---------------|
| Phenotypes related to embryo development               |                                                                                                                                                         |               |
| $\alpha$ -Catenin                                      | Retarded blastocyst development with disrupted trophectoderm leading to embryonic lethality                                                             | 401           |
| ATP-binding cassette transporter 1                     | Defective steroid hormone synthesis; placental malformations and impaired embryo growth in mutant females leading to subfertility                       | 402           |
| Cannabinoid receptor (CB1)                             | Asynchronous preimplantation development in female mutants leading to subfertility                                                                      | 60            |
| E-cadherin                                             | Failure of blastocyst formation leading to early embryonic death                                                                                        | 150           |
| FGF-4                                                  | Defective proliferation of inner cell mass causing embryonic demise                                                                                     | 403           |
| Heat shock transcription factor 1                      | Normal ovulation and fertilization in female mutants, but failure of preimplantation embryo development (maternal effect) leading to female infertility | 404, 405      |
| Maternal effect gene (Mater)                           | Defective preimplantation embryo development in female mutants leading to infertility                                                                   | 406           |
| Nucleoplasmin 2                                        | Defective chromatin remodeling and preimplantation embryo development (subfertility)                                                                    | 407           |
| Synaptonemal complex protein 3                         | Defective meiotic chromosomal segmentation resulting in aneuploidy and embryonic death (subfertility)                                                   | 408           |
| Phenotypes related to uterine biology and implantation |                                                                                                                                                         |               |
| ADAMTS-1                                               | Impaired fertilization with ovarian histological changes (uterine cysts) leading to subfertility                                                        | 409           |
| $\alpha$ -Tocopherol                                   | Fetal resorption due to vitamin D deficiency                                                                                                            | 410           |
| Basigin                                                | Defective fertilization and implantation                                                                                                                | 411, 412      |
| Centromere protein B                                   | Disrupted luminal and glandular uterine epithelium leading to subfertility (genetic background dependent)                                               | 413           |
| Colony-stimulating factor-1                            | Defective implantation and reduced fertility                                                                                                            | 227, 414      |
| COX-2                                                  | Impaired ovulation and fertilization; defective attachment reaction and decidualization associated with reduced angiogenic response                     | 186, 188      |
| Cytosolic phospholipase A <sub>2</sub>                 | On-time implantation is deferred and gives rise to postimplantation defects leading to small litter size (maternal effect)                              | 54            |
| EGF-R                                                  | Implantation or postimplantation failures of (–/–) embryos (genetic background dependent)                                                               | 222           |
| ER $\alpha$                                            | Ovarian cysts with uterine hypoplasia leading to infertility                                                                                            | 99, 415–417   |
| Hmx3                                                   | Failure of implantation (maternal effect)                                                                                                               | 255           |
| HoxA 10                                                | Primarily defective decidualization leading to reduced fertility (maternal effect)                                                                      | 248, 251, 418 |
| HoxA 11                                                | Lack of uterine glands with defective implantation and decidualization and infertility                                                                  | 249, 250      |
| 25-Hydroxyvitamin D 1 $\alpha$ -hydroxylase enzyme     | Uterine hypoplasia and absence of corpus luteum leading to infertility                                                                                  | 419           |
| IGF-I                                                  | Defective ovarian and uterine functions with infertility                                                                                                | 420           |
| IL 11 receptor IL-11R $\alpha$                         | Impaired decidualization leading to infertility                                                                                                         | 229           |
| LIF                                                    | Failure in implantation and decidualization (maternal effect)                                                                                           | 228           |
| PPAR $\delta$                                          | Placental defects in the majority of (–/–) embryos leading to lethality; uterine defects causing subfertility                                           | 190, 259      |
| PPAR $\gamma$                                          | Placental defects leading to embryonic lethality                                                                                                        | 263           |
| PR                                                     | Unopposed estrogen action and uterine hyperplasia with failure in implantation and decidualization                                                      | 103           |
| Ubiquitin protein ligase E6AP                          | Ovarian and uterine hypoplasia leading to subfertility                                                                                                  | 421           |
| Wnt7a                                                  | Abnormal oviduct and uterine development leading to infertility                                                                                         | 422           |

Strategies comparing global gene expression profiles between the implantation and interimplantation sites have identified novel genes in the implantation process. Thus, a genome-wide screening approach coupled with functional assays will help elucidate these complex signaling pathways. In addition, further experiments should be pursued to compare gene expression patterns between the uterine-receptive and nonreceptive phases, and between the active and dormant blastocysts under defined experimental conditions. The results obtained from these experiments may help uncover new signaling molecules and pathways not previously identified. The application of proteomics is also likely to provide information regarding interactions among various molecular pathways in specifying the molecular road map to implantation. Another area of research that deserves particular attention is the identification of embryonic signaling molecules that influence uterine functions for implantation. Although chorionic gonadotropins in primates are well known for their role in pregnancy establishment, it is not yet clear whether they also function as implantation initiators. The situation is different in large animals in which embryo-derived interferons and estrogens are known to function as important signaling molecules for pregnancy recognition (12, 399, 400). These studies have been possible due to the availability of relatively large amounts of blastocyst tissue in these species. In other species, including rodents and humans, the most limiting factor has been the availability of an adequate amount of tissue for biochemical and molecular biology experiments. With the advent of microscale proteomics and genomic approaches, it is hoped that more information on embryonic signals is likely to be forthcoming.

Finally, although the mechanics and cellular architecture of the implantation process vary, certain basic similarities do exist among species. For example, implantation occurs at the blastocyst stage, there is a defined window of uterine receptivity for implantation, a reciprocal interaction between the blastocyst and the uterus is essential for implantation, and a localized increase in uterine vascular permeability occurs at the site of the blastocyst during the attachment reaction. Thus, recognition and characterization of signaling pathways in these steps may give rise to a unifying scheme relevant to understanding the mechanism of human implantation.

### Acknowledgments

We thank Ben Danzo for his critical reading and editing of the manuscript and Stan Fernald of the Cell Imaging Facility at the Center for Reproductive Sciences at the University of Kansas Medical Center for the artwork. We apologize for unintended omission of any relevant references.

Address all correspondence and requests for reprints to: S. K. Dey, Ph.D., Department of Pediatrics, Vanderbilt University Medical Center, MCN D4100, Nashville, Tennessee 37232. E-mail: sk.dey@vanderbilt.edu.

Studies by the authors incorporated in this review were supported by National Institutes of Health Grants HD29968, HD12304, HD33994, DA 06668 (to S.K.De.), HD 40810 (to H.L.), HD37830 (to S.K.De.), HD40221 (to J.R.), and HD37394 (to B.C.P.). S.K.De. is recipient of MERIT Awards from the National Institute of Child Health and Human Development and the National Institute on Drug Abuse. H.W. is Lalor Foundation postdoctoral fellow.

### References

1. Gardner RL, Papaioannou VE 1975 Differentiation in the trophectoderm and inner cell mass. In: Balls M, Wild AE, eds. The early development of mammals. London: Cambridge University Press; 107–132
2. Renfree MB 1982 Implantation and placentation. In: Austin CR, Short RV, eds. Reproduction in mammals. Cambridge, UK: Cambridge University Press; 26–69
3. Carson DD, Bagchi I, Dey SK, Enders AC, Fazleabas AT, Lessey BA, Yoshinaga K 2000 Embryo implantation. *Dev Biol* 223:217–237
4. Paria BC, Reese J, Das SK, Dey SK 2002 Deciphering the cross-talk of implantation: advances and challenges. *Science* 296:2185–2188
5. Lim H, Song H, Paria BC, Reese J, Das SK, Dey SK 2002 Molecules in blastocyst implantation: uterine and embryonic perspectives. *Vitam Horm* 64:43–76
6. Norwitz ER, Schust DJ, Fisher SJ 2001 Implantation and the survival of early pregnancy. *N Engl J Med* 345:1400–1408
7. Giudice LC 1999 Potential biochemical markers of uterine receptivity. *Hum Reprod* 14(Suppl 2):3–16
8. Artley JK, Braude PR, Johnson MH 1992 Gene activity and cleavage arrest in human pre-embryos. *Hum Reprod* 7:1014–1021
9. Hogan B, Constantini F, Lacy E 1994 Manipulating the mouse embryo: a laboratory manual, 2nd ed. Cold Spring Harbor, NY: Cold Spring Harbor Press
10. McLaren A 1990 The embryo. In: Austin CR, Short RV eds. Reproduction in mammals. Cambridge, UK: Cambridge University Press; 1–26
11. Petraglia F, Santuz M, Florio P, Simoncini T, Luisi S, Plaino L, Genazzani AR, Genazzani AD, Volpe A 1998 Paracrine regulation of human placenta: control of hormonogenesis. *J Reprod Immunol* 39:221–233
12. Roberts RM, Ealy AD, Alexenko AP, Han CS, Ezashi T 1999 Trophoblast interferons. *Placenta* 20:259–264
13. Sherman MI 1978 Implantation of mouse blastocysts in vitro. In: Daniels JC, ed. Methods in mammalian reproduction. New York: Academic Press; 247–257
14. McLaren A 1971 Blastocysts in the mouse uterus: the effect of ovariectomy, progesterone and oestrogen. *J Endocrinol* 50:515–526
15. Bowman P, McLaren A 1970 Cleavage rate of mouse embryos in vivo and in vitro. *J Embryol Exp Morphol* 24:203–207
16. Roblero LS, Garavagno AC 1979 Effect of oestradiol-17  $\beta$  and progesterone on oviductal transport and early development of mouse embryos. *J Reprod Fertil* 57:91–95
17. Paria BC, Lim H, Wang XN, Liehr J, Das SK, Dey SK 1998 Co-ordination of differential effects of primary estrogen and catecholesterogen on two distinct targets mediates embryo implantation in the mouse. *Endocrinology* 139:5235–5246
18. Paria BC, Dey SK 1990 Preimplantation embryo development in vitro: cooperative interactions among embryos and role of growth factors. *Proc Natl Acad Sci USA* 87:4756–4760
19. Paria BC, Lim H, Das SK, Reese J, Dey SK 2000 Molecular signaling in uterine receptivity for implantation. *Semin Cell Dev Biol* 11:67–76
20. Stewart CL, Cullinan EB 1997 Preimplantation development of the mammalian embryo and its regulation by growth factors. *Dev Genet* 21:91–101
21. Enders AC, Schlafke S 1967 A morphological analysis of the early implantation stages in the rat. *Am J Anat* 120:185–226
22. Enders AC, Schlafke S 1969 Cytological aspects of trophoblast-uterine interaction in early implantation. *Am J Anat* 125:1–29
23. Bonnet R 1884 Beitrage zur embryologie der wiederkauer, gewonnen am schafei. *Arch Anat Physiol* 8:170–230
24. Schlafke S, Enders AC 1975 Cellular basis of interaction between trophoblast and uterus at implantation. *Biol Reprod* 12:41–65
25. Psychoyos A 1973 Endocrine control of egg implantation. In: Greep RO, Astwood EG, Geiger SR, eds. Handbook of physiology. Washington, DC: American Physiology Society; 187–215
26. Das SK, Wang XN, Paria BC, Damm D, Abraham JA, Klagsbrun M, Andrews GK, Dey SK 1994 Heparin-binding EGF-like growth factor gene is induced in the mouse uterus temporally by the blastocyst solely at the site of its apposition: a possible ligand for



- interaction with blastocyst EGF-receptor in implantation. *Development* 120:1071–1083
27. **Hoos PC, Hoffman LH** 1980 Temporal aspects of rabbit uterine vascular and decidual responses to blastocyst stimulation. *Biol Reprod* 23:453–459
  28. **Enders AC, Schlafke S** 1986 Implantation in nonhuman primates and in the human. *Comp Primate Biol* 3:453–459
  29. **Enders AC, Lopata A** 1999 Implantation in the marmoset monkey: expansion of the early implantation site. *Anat Rec* 256:279–299
  30. **Dey SK** 1996 Implantation. In: Adashi EY, Rock JA, Rosenwaks Z, eds. *Reproductive endocrinology, surgery and technology*. New York: Lippincott-Raven; 421–434
  31. **Finn CA, Porter DG** 1975 *The uterus*. Acton, MA: Publishing Sciences Group, Inc.
  32. **Kirby DRS** 1971 Blastocyst-uterine relationship before and during implantation. In: Blandau RJ, ed. *The biology of blastocysts*. Chicago: The University of Chicago Press; 393–410
  33. **Mead RA** 1993 Embryonic diapause in vertebrates. *J Exp Zool* 266:629–641
  34. **Yoshinaga K, Adams CE** 1966 Delayed implantation in the spayed, progesterone treated adult mouse. *J Reprod Fertil* 12:593–595
  35. **Yoshinaga K, Hosi T** 1958 On the delayed implantation in lactating pregnant rat. I. The effect of estrogen. *Jpn J Anim Reprod* 3:93–94
  36. **McLaren A** 1968 A study of blastocysts during delay and subsequent implantation in lactating mice. *J Endocrinol* 42:453–463
  37. **Aitken RJ** 1977 Embryonic diapause. In: Johnson MH, ed. *Development in mammals*. Amsterdam: North Holland Publishing Co; 307–359
  38. **Daniel Jr JC** 1973 Dormant embryos of mammals. *Bio Sci* 20:411–415
  39. **McLaren A** 1973 Blastocyst activation. In: Segal SJ, Crozier R, Corfman PA, Condliffe PG, eds. *The regulation of mammalian reproduction*. Springfield, IL: Charles C. Thomas; 321–328
  40. **Mead RA** 1981 Delayed implantation in mustelids, with special emphasis on the spotted skunk. *J Reprod Fertil Suppl* 29:11–24
  41. **Psychoyos A** 1973 Hormonal control of oviimplantation. *Vitam Horm* 31:201–256
  42. **Yoshinaga K** 1988 Uterine receptivity for blastocyst implantation. *Ann NY Acad Sci* 541:424–431
  43. **Paria BC, Huet H, Dey SK** 1993 Blastocyst's state of activity determines the "window" of implantation in the receptive mouse uterus. *Proc Natl Acad Sci USA* 90:10159–10162
  44. **Heap RB, Deanesly R** 1967 The increase in plasma progesterone levels in the pregnant guinea-pig and its possible significance. *J Reprod Fertil* 14:339–341
  45. **Harper MJ, Dowd D, Elliott AS** 1969 Implantation and embryonic development in the ovariectomized-adrenalectomized hamster. *Biol Reprod* 1:253–257
  46. **Kwun JK, Emmens CW** 1974 Hormonal requirements for implantation and pregnancy in the ovariectomized rabbit. *Aust J Biol Sci* 27:275–283
  47. **McCormack JT, Greenwald GS** 1974 Evidence for a preimplantation rise in oestradiol-17 $\beta$  levels on day 4 of pregnancy in the mouse. *J Reprod Fertil* 41:297–301
  48. **Heap RB, Flint AP, Hartmann PE, Gadsby JE, Staples LD, Ackland N, Hamon M** 1981 Oestrogen production in early pregnancy. *J Endocrinol* 89 (Suppl):77P–94P
  49. **Stromstedt M, Keeney DS, Waterman MR, Paria BC, Conley AJ, Dey SK** 1996 Preimplantation mouse blastocysts fail to express CYP genes required for estrogen biosynthesis. *Mol Reprod Dev* 43:428–436
  50. **Huet H, Andrews GK, Dey SK** 1989 Cell type-specific localization of *c-myc* protein in the mouse uterus: modulation by steroid hormones and analysis of the periimplantation period. *Endocrinology* 125:1683–1690
  51. **Lundkvist O, Nilsson BO** 1982 Endometrial ultrastructure in the early uterine response to blastocysts and artificial decidualogenic stimuli in rats. *Cell Tissue Res* 225:355–364
  52. **Paria BC, Ma W, Tan J, Raja S, Das SK, Dey SK, Hogan BL** 2001 Cellular and molecular responses of the uterus to embryo implantation can be elicited by locally applied growth factors. *Proc Natl Acad Sci USA* 98:1047–1052
  53. **Huet H, Dey SK** 1990 Requirement for progesterone priming and its long-term effects on implantation in the mouse. *Proc Soc Exp Biol Med* 193:259–263
  54. **Song H, Lim H, Paria BC, Matsumoto H, Swift LL, Morrow J, Bonventre JV, Dey SK** 2002 Cytosolic phospholipase A2 $\alpha$  is crucial [correction of A2 $\alpha$  deficiency is crucial] for 'on-time' embryo implantation that directs subsequent development. *Development* [Erratum (2002) 129:3761]129:2879–2889
  55. **Ma WG, Song H, Das SK, Paria BC, Dey SK** 2003 Estrogen is a critical determinant that specifies the duration of the window of uterine receptivity for implantation. *Proc Natl Acad Sci USA* 100:2963–2968
  56. **Paria BC, Das SK, Andrews GK, Dey SK** 1993 Expression of the epidermal growth factor receptor gene is regulated in mouse blastocysts during delayed implantation. *Proc Natl Acad Sci USA* 90:55–59
  57. **Raab G, Kover K, Paria BC, Dey SK, Ezzell RM, Klagsbrun M** 1996 Mouse preimplantation blastocysts adhere to cells expressing the transmembrane form of heparin-binding EGF-like growth factor. *Development* 122:637–645
  58. **Lim H, Das SK, Dey SK** 1998 *erbB* genes in the mouse uterus: cell-specific signaling by epidermal growth factor (EGF) family of growth factors during implantation. *Dev Biol* 204:97–110
  59. **Zhao X, Ma W, Das SK, Dey SK, Paria BC** 2000 Blastocyst H(2) receptor is the target for uterine histamine in implantation in the mouse. *Development* 127:2643–2651
  60. **Paria BC, Song H, Wang X, Schmid PC, Krebsbach RJ, Schmid HH, Bonner TI, Zimmer A, Dey SK** 2001 Dysregulated cannabinoid signaling disrupts uterine receptivity for embryo implantation. *J Biol Chem* 276:20523–20528
  61. **Tsai MJ, O'Malley BW** 1994 Molecular mechanisms of action of steroid/thyroid receptor superfamily members. *Annu Rev Biochem* 63:451–486
  62. **Beato M, Herrlich P, Schutz G** 1995 Steroid hormone receptors: many actors in search of a plot. *Cell* 83:851–857
  63. **Kuiper GG, Enmark E, Pelto H, Nilsson S, Gustafsson JA** 1996 Cloning of a novel receptor expressed in rat prostate and ovary. *Proc Natl Acad Sci USA* 93:5925–5930
  64. **Couse JF, Korach KS** 1999 Estrogen receptor null mice: what have we learned and where will they lead us? *Endocr Rev* 20:358–417
  65. **Stancel GM, Boettger T, Chiappetta C, Hyder SM, Kirkland JL, Murthy L, Loese M** 1995 Toxicity of endogenous and environmental estrogens: what is the role of elemental interactions? *Environ Health Perspect* 103(Suppl 7):29–33
  66. **Klein H, Ryffel GU, Heitlinger E, Cato AC** 1988 A 13 bp palindrome is a functional estrogen responsive element and interacts specifically with estrogen receptor. *Nucleic Acids Res* 16:647–663
  67. **Aumais JP, Lee HS, DeGannes C, Horsford J, White JH** 1996 Function of directly repeated half-sites as response elements for steroid hormone receptors. *J Biol Chem* 271:12568–12577
  68. **Umayahara Y, Kawamori R, Watada H, Imano E, Iwama N, Morishima T, Yamasaki Y, Kajimoto Y, Kamada T** 1994 Estrogen regulation of the insulin-like growth factor I gene transcription involves an AP-1 enhancer. *J Biol Chem* 269:16433–16442
  69. **Sukovich DA, Mukherjee R, Benfield PA** 1994 A novel, cell-type-specific mechanism for estrogen receptor-mediated gene activation in the absence of an estrogen-responsive element. *Mol Cell Biol* 14:7134–7143
  70. **Krishnan V, Wang X, Safe S** 1994 Estrogen receptor-Sp1 complexes mediate estrogen-induced cathepsin D gene expression in MCF-7 human breast cancer cells. *J Biol Chem* 269:15912–15917
  71. **Kato S, Endoh H, Masuhiro Y, Kitamoto T, Uchiyama S, Sasaki H, Masushige S, Gotoh Y, Nishida E, Kawashima H** 1995 Activation of the estrogen receptor through phosphorylation by mitogen-activated protein kinase. *Science* 270:1491–1494
  72. **McKenna NJ, O'Malley BW** 2002 Combinatorial control of gene expression by nuclear receptors and coregulators. *Cell* 108:465–474
  73. **McKenna NJ, O'Malley BW** 2000 An issue of tissues: divining the split personalities of selective estrogen receptor modulators. *Nat Med* 6:960–962
  74. **Stewart PJ, Webster RA** 1983 Intrauterine injection of cholera toxin induces estrogen-like uterine growth. *Biol Reprod* 29:671–679
  75. **Aronica SM, Kraus WL, Katzenellenbogen BS** 1994 Estrogen action via the cAMP signaling pathway: stimulation of adenylate

- cyclase and cAMP-regulated gene transcription. *Proc Natl Acad Sci USA* 91:8517–8521
76. **Rajkumar K** 1993 Effect of protein kinase-C inhibitor on estradiol-induced deoxyribonucleic acid synthesis in rats. *Steroids* 58:100–105
  77. **Pietras RJ, Szego CM** 1977 Specific binding sites for oestrogen at the outer surfaces of isolated endometrial cells. *Nature* 265:69–72
  78. **Razandi M, Pedram A, Park ST, Levin ER** 2003 Proximal events in signaling by plasma membrane estrogen receptors. *J Biol Chem* 278:2701–2712
  79. **Jobling S, Reynolds T, White R, Parker MG, Sumpter JP** 1995 A variety of environmentally persistent chemicals, including some phthalate plasticizers, are weakly estrogenic. *Environ Health Perspect* 103:582–587
  80. **Whitten PL, Naftolin F** 1990 Dietary estrogens: a biologically active background for estrogen action. In: Hochberg RB, Naftolin F, eds. *The new biology of steroid hormones*. New York: Raven Press; 155–167
  81. **Kuiper GG, Carlsson B, Grandien K, Enmark E, Haggblad J, Nilsson S, Gustafsson JA** 1997 Comparison of the ligand binding specificity and transcript tissue distribution of estrogen receptors  $\alpha$  and  $\beta$ . *Endocrinology* 138:863–870
  82. **Cowley SM, Hoare S, Mosselman S, Parker MG** 1997 Estrogen receptors  $\alpha$  and  $\beta$  form heterodimers on DNA. *J Biol Chem* 272:19858–19862
  83. **Nelson JA, Struck RF, James R** 1978 Estrogenic activities of chlorinated hydrocarbons. *J Toxicol Environ Health* 4:325–339
  84. **Robinson AK, Mukku VR, Stancel GM** 1985 Analysis and characterization of estrogenic xenobiotics and natural products. In: McLachlan JA, ed. *Estrogens in the environment*. New York: Elsevier Science Publishing, Inc.; 107–115
  85. **Sirois J, Simmons DL, Richards JS** 1992 Hormonal regulation of messenger ribonucleic acid encoding a novel isoform of prostaglandin endoperoxide H synthase in rat preovulatory follicles. Induction in vivo and in vitro. *J Biol Chem* 267:11586–11592
  86. **Kupfer D, Bulger WH** 1990 Inactivation of the uterine estrogen receptor binding of estradiol during P-450 catalyzed metabolism of chlorotrianisene (TACE). Speculation that TACE antiestrogenic activity involves covalent binding to the estrogen receptor. *FEBS Lett* 261:59–62
  87. **Meyers CY, Kolb VM, Gass GH, Rao BR, Roos CF, Dandliker WB** 1988 Doisy-nolic-type acids—uterotropically potent estrogens which compete poorly with estradiol for cytosolic estradiol receptors. *J Steroid Biochem* 31:393–404
  88. **Meyers CY, Lutfi HG, Adler S** 1997 Transcriptional regulation of estrogen-responsive genes by non-steroidal estrogens: doisy-nolic and allenolic acids. *J Steroid Biochem Mol Biol* 62:477–489
  89. **Johnson DC, Sen M, Kogo H, Dey SK** 1990 Initiation of embryo implantation and maintenance of early pregnancy in the rat by chlordecone (Kepone). *Proc Soc Exp Biol Med* 195:44–50
  90. **Cummings AM** 1997 Methoxychlor as a model for environmental estrogens. *Crit Rev Toxicol* 27:367–379
  91. **Das SK, Taylor JA, Korach KS, Paria BC, Dey SK, Lubahn DB** 1997 Estrogenic responses in estrogen receptor- $\alpha$  deficient mice reveal a distinct estrogen signaling pathway. *Proc Natl Acad Sci USA* 94:12786–12791
  92. **Das SK, Tan J, Raja S, Halder J, Paria BC, Dey SK** 2000 Estrogen targets genes involved in protein processing, calcium homeostasis, and Wnt signaling in the mouse uterus independent of estrogen receptor- $\alpha$  and - $\beta$ . *J Biol Chem* 275:28834–28842
  93. **Das SK, Tan J, Johnson DC, Dey SK** 1998 Differential spatiotemporal regulation of lactoferrin and progesterone receptor genes in the mouse uterus by primary estrogen, catechol estrogen, and xenoestrogen. *Endocrinology* 139:2905–2915
  94. **Das SK, Paria BC, Johnson DC, Dey SK** 1997 Embryo-uterine interactions during implantation: potential sites of interference by environmental toxins. In: Boekelheide K, Chapin RE, Hoyer PB, Harris C, eds. *Comprehensive toxicology*. New York: Elsevier Science Ltd; 317–328
  95. **Ghosh D, Taylor JA, Green JA, Lubahn DB** 1999 Methoxychlor stimulates estrogen-responsive messenger ribonucleic acids in mouse uterus through a non-estrogen receptor (non-ER)  $\alpha$  and non-ER  $\beta$  mechanism. *Endocrinology* 140:3526–3533
  96. **Couse JF, Curtis SW, Washburn TF, Lindzey J, Golding TS, Lubahn DB, Smithies O, Korach KS** 1995 Analysis of transcription and estrogen insensitivity in the female mouse after targeted disruption of the estrogen receptor gene. *Mol Endocrinol* 9:1441–1454
  97. **Chen D, Ganapathy P, Zhu LJ, Xu X, Li Q, Bagchi IC, Bagchi MK** 1999 Potential regulation of membrane trafficking by estrogen receptor  $\alpha$  via induction of rab11 in uterine glands during implantation. *Mol Endocrinol* 13:993–1004
  98. **Tan J, Paria BC, Dey SK, Das SK** 1999 Differential uterine expression of estrogen and progesterone receptors correlates with uterine preparation for implantation and decidualization in the mouse. *Endocrinology* 140:5310–5321
  99. **Lubahn DB, Moyer JS, Golding TS, Couse JF, Korach KS, Smithies O** 1993 Alteration of reproductive function but not prenatal sexual development after insertional disruption of the mouse estrogen receptor gene. *Proc Natl Acad Sci USA* 90:11162–11166
  100. **Curtis H, Goulding EH, Eddy EM, Korach KS** 2002 Studies using the estrogen receptor  $\alpha$  knockout uterus demonstrate that implantation but not decidualization-associated signaling is estrogen dependent. *Biol Reprod* 67:1268–1277
  101. **Paria BC, Tan J, Lubahn DB, Dey SK, Das SK** 1999 Uterine decidual response occurs in estrogen receptor- $\alpha$ -deficient mice. *Endocrinology* 140:2704–2710
  102. **Curtis SW, Clark J, Myers P, Korach KS** 1999 Disruption of estrogen signaling does not prevent progesterone action in the estrogen receptor  $\alpha$  knockout mouse uterus. *Proc Natl Acad Sci USA* 96:3646–3651
  103. **Lydon JP, DeMayo FJ, Funk CR, Mani SK, Hughes AR, Montgomery CA, Shyamala G, Conneely OM, O'Malley BW** 1995 Mice lacking progesterone receptor exhibit pleiotropic reproductive abnormalities. *Genes Dev* 9:2266–2278
  104. **Mulac J, Mullinax RA, DeMayo FJ, Lydon JP, Conneely OM** 2000 Subgroup of reproductive functions of progesterone mediated by progesterone receptor-B isoform. *Science* 289:1751–1754
  105. **Hou Q, Paria BC, Mui C, Dey SK, Gorski J** 1996 Immunolocalization of estrogen receptor protein in the mouse blastocyst during normal and delayed implantation. *Proc Natl Acad Sci USA* 93:2376–2381
  106. **Kowalski AA, Graddy LG, Vale C, Choi I, Katzenellenbogen BS, Simmen FA, Simmen RC** 2002 Molecular cloning of porcine estrogen receptor- $\beta$  complementary DNAs and developmental expression in periimplantation embryos. *Biol Reprod* 66:760–769
  107. **Hiroi H, Momoeda M, Inoue S, Tsuchiya F, Matsumi H, Tsutsumi O, Muramatsu M, Taketani Y** 1999 Stage-specific expression of estrogen receptor subtypes and estrogen responsive finger protein in preimplantational mouse embryos. *Endocr J* 46:153–158
  108. **Shen Z, Liu J, Wells RL, Elkind MM** 1994 cDNA cloning, sequence analysis, and induction by aryl hydrocarbons of a murine cytochrome P450 gene, Cyp1b1. *DNA Cell Biol* 13:763–769
  109. **Aplin JD** 1997 Adhesion molecules in implantation. *Rev Reprod* 2:84–93
  110. **Kimber SJ, Spanswick C** 2000 Blastocyst implantation: the adhesion cascade. *Semin Cell Dev Biol* 11:77–92
  111. **Surveyor GA, Gendler SJ, Pemberton L, Das SK, Chakraborty I, Julian J, Pimental RA, Wegner CC, Dey SK, Carson DD** 1995 Expression and steroid hormonal control of Muc-1 in the mouse uterus. *Endocrinology* 136:3639–3647
  112. **Hoffman LH, Olson GE, Carson DD, Chilton BS** 1998 Progesterone and implanting blastocysts regulate Muc1 expression in rabbit uterine epithelium. *Endocrinology* 139:266–271
  113. **Meseguer M, Aplin JD, Caballero C, Connor JE, Martin JC, Remohi J, Pellicer A, Simon C** 2001 Human endometrial mucin MUC1 is up-regulated by progesterone and down-regulated in vitro by the human blastocyst. *Biol Reprod* 64:590–601
  114. **Giancotti FG, Ruoslahti E** 1999 Integrin signaling. *Science* 285:1028–1032
  115. **Tabibzadeh S** 1992 Patterns of expression of integrin molecules in human endometrium throughout the menstrual cycle. *Hum Reprod* 7:876–882
  116. **Klентzeris LD, Bulmer JN, Trejdosiewicz LK, Morrison L, Cooke ID** 1993  $\beta$ -1 Integrin cell adhesion molecules in the endometrium of fertile and infertile women. *Hum Reprod* 8:1223–1230
  117. **Lessey BA, Damjanovich L, Coutifaris C, Castelbaum A, Albelda**

- SM, Buck CA 1992 Integrin adhesion molecules in the human endometrium. Correlation with the normal and abnormal menstrual cycle. *J Clin Invest* 90:188–195
118. Lessey BA 1994 The use of integrins for the assessment of uterine receptivity. *Fertil Steril* 61:812–814
  119. Lessey BA, Ilesanmi AO, Lessey MA, Riben M, Harris JE, Chwalisz K 1996 Luminal and glandular endometrial epithelium express integrins differentially throughout the menstrual cycle: implications for implantation, contraception, and infertility. *Am J Reprod Immunol* 35:195–204
  120. Lessey BA, Castelbaum AJ, Sawin SW, Sun J 1995 Integrins as markers of uterine receptivity in women with primary unexplained infertility. *Fertil Steril* 63:535–542
  121. Illera MJ, Cullinan E, Gui Y, Yuan L, Beyler SA, Lessey BA 2000 Blockade of the  $\alpha(v)\beta(3)$  integrin adversely affects implantation in the mouse. *Biol Reprod* 62:1285–1290
  122. Sutherland AE, Calarco PG, Damsky CH 1993 Developmental regulation of integrin expression at the time of implantation in the mouse embryo. *Development* 119:1175–1186
  123. Schultz JF, Armant DR 1995  $\beta 1$ - And  $\beta 3$ -class integrins mediate fibronectin binding activity at the surface of developing mouse peri-implantation blastocysts. Regulation by ligand-induced mobilization of stored receptor. *J Biol Chem* 270:11522–11531
  124. Stephens LE, Sutherland AE, Klimanskaya IV, Andrieux A, Meneses J, Pedersen RA, Damsky CH 1995 Deletion of  $\beta 1$  integrins in mice results in inner cell mass failure and peri-implantation lethality. *Genes Dev* 9:1883–1895
  125. Wang J, Mayernik L, Armant DR 2002 Integrin signaling regulates blastocyst adhesion to fibronectin at implantation: intracellular calcium transients and vesicle trafficking in primary trophoblast cells. *Dev Biol* 245:270–279
  126. Armant DR, Wang J, Liu Z 2000 Intracellular signaling in the developing blastocyst as a consequence of the maternal-embryonic dialogue. *Semin Reprod Med* 18:273–287
  127. Wang J, Armant DR 2002 Integrin-mediated adhesion and signaling during blastocyst implantation. *Cells Tissues Organs* 172:190–201
  128. Fassler R, Meyer M 1995 Consequences of lack of  $\beta 1$  integrin gene expression in mice. *Genes Dev* 9:1896–1908
  129. Hynes RO 1996 Targeted mutations in cell adhesion genes: what have we learned from them? *Dev Biol* 180:402–412
  130. Kreidberg JA, Donovan MJ, Goldstein SL, Rennke H, Shepherd K, Jones RC, Jaenisch R 1996  $\alpha 3 \beta 1$  Integrin has a crucial role in kidney and lung organogenesis. *Development* 122:3537–3547
  131. Gardner H, Kreidberg J, Koteliangsky V, Jaenisch R 1996 Deletion of integrin  $\alpha 1$  by homologous recombination permits normal murine development but gives rise to a specific deficit in cell adhesion. *Dev Biol* 175:301–313
  132. Armant DR, Kaplan HA, Lennarz WJ 1986 Fibronectin and laminin promote in vitro attachment and outgrowth of mouse blastocysts. *Dev Biol* 116:519–523
  133. Carson DD, Tang JP, Gay S 1988 Collagens support embryo attachment and outgrowth in vitro: effects of the Arg-Gly-Asp sequence. *Dev Biol* 127:368–375
  134. Sutherland AE, Calarco PG, Damsky CH 1988 Expression and function of cell surface extracellular matrix receptors in mouse blastocyst attachment and outgrowth. *J Cell Biol* 106:1331–1348
  135. Yelian FD, Edgeworth NA, Dong LJ, Chung AE, Armant DR 1993 Recombinant entactin promotes mouse primary trophoblast cell adhesion and migration through the Arg-Gly-Asp (RGD) recognition sequence. *J Cell Biol* 121:923–929
  136. Wordinger RJ, Jackson FL, Morrill A 1986 Implantation, deciduoma formation and live births in mast cell-deficient mice (*W/W<sup>v</sup>*). *J Reprod Fertil* 77:471–476
  137. Armant DR, Kameda S 1994 Mouse trophoblast cell invasion of extracellular matrix purified from endometrial tissue: a model for peri-implantation development. *J Exp Zool* 269:146–156
  138. Wartiovaara J, Leivo I, Vaheri A 1979 Expression of the cell surface-associated glycoprotein, fibronectin, in the early mouse embryo. *Dev Biol* 69:247–257
  139. Wewer UM, Liotta LA, Jaye M, Ricca GA, Drohan WN, Claysmith AP, Rao CN, Wirth P, Coligan JE, Albrechtsen R 1986 Altered levels of laminin receptor mRNA in various human carcinoma cells that have different abilities to bind laminin. *Proc Natl Acad Sci USA* 83:7137–7141
  140. Blankenship TN, Enders AC, King BF 1992 Distribution of laminin, type IV collagen, and fibronectin in the cell columns and trophoblastic shell of early macaque placentas. *Cell Tissue Res* 270:241–248
  141. Armant DR, Kaplan HA, Mover H, Lennarz WJ 1986 The effect of hexapeptides on attachment and outgrowth of mouse blastocysts cultured in vitro: evidence for the involvement of the cell recognition tripeptide Arg-Gly-Asp. *Proc Natl Acad Sci USA* 83:6751–6755
  142. Hynes RO 1992 Specificity of cell adhesion in development: the cadherin superfamily. *Curr Opin Genet Dev* 2:621–624
  143. Armant DR 1991 Cell interactions with laminin and its proteolytic fragments during outgrowth of mouse primary trophoblast cells. *Biol Reprod* 45:664–672
  144. Klaffky E, Williams R, Yao CC, Ziober B, Kramer R, Sutherland A 2001 Trophoblast-specific expression and function of the integrin  $\alpha 7$  subunit in the peri-implantation mouse embryo. *Dev Biol* 239:161–175
  145. Fukuda MN, Sato T, Nakayama J, Klier G, Mikami M, Aoki D, Nozawa S 1995 Trophinin and tasin, a novel cell adhesion molecule complex with potential involvement in embryo implantation. *Genes Dev* 9:1199–1210
  146. Suzuki N, Nakayama J, Shih IM, Aoki D, Nozawa S, Fukuda MN 1999 Expression of trophinin, tasin, and bystin by trophoblast and endometrial cells in human placenta. *Biol Reprod* 60:621–627
  147. Suzuki N, Nadano D, Paria BC, Kupriyanov S, Sugihara K, Fukuda MN 2000 Trophinin expression in the mouse uterus coincides with implantation and is hormonally regulated but not induced by implanting blastocysts. *Endocrinology* 141:4247–4254
  148. Ozawa M, Engel J, Kemler R 1990 Single amino acid substitutions in one  $\text{Ca}^{2+}$  binding site of uvomorulin abolish the adhesive function. *Cell* 63:1033–1038
  149. Ozawa M, Kemler R 1992 Molecular organization of the uvomorulin-catenin complex. *J Cell Biol* 116:989–996
  150. Larue L, Ohsugi M, Hirchenhain J, Kemler R 1994 E-cadherin null mutant embryos fail to form a trophectoderm epithelium. *Proc Natl Acad Sci USA* 91:8263–8267
  151. Riethmacher D, Brinkmann V, Birchmeier C 1995 A targeted mutation in the mouse E-cadherin gene results in defective pre-implantation development. *Proc Natl Acad Sci USA* 92:855–859
  152. Paria BC, Zhao X, Das SK, Dey SK, Yoshinaga K 1999 Zonula occludens-1 and E-cadherin are coordinately expressed in the mouse uterus with the initiation of implantation and decidualization. *Dev Biol* 208:488–501
  153. Wang X, Matsumoto H, Zhao X, Das SK, Paria BC 2004 Embryonic signals direct formation of tight junctional permeability barrier in the decidualizing stroma during embryo implantation. *J Cell Sci* 117:53–62
  154. Genbacev OD, Prakobphol A, Foulk RA, Krtolica AR, Ilic D, Singer MS, Yang ZQ, Kiessling LL, Rosen SD, Fisher SJ 2003 Trophoblast L-selectin-mediated adhesion at the maternal-fetal interface. *Science* 299:405–408
  155. Chobotova K, Spyropoulou I, Carver J, Manek S, Heath JK, Gullick WJ, Barlow DH, Sargent IL, Mardon HJ 2002 Heparin-binding epidermal growth factor and its receptor ErbB4 mediate implantation of the human blastocyst. *Mech Dev* 119:137–144
  156. Hakanson R 1967 Kinetic properties of mammalian histidine decarboxylase. *Eur J Pharmacol* 1:42–46
  157. Schwartz JC 1977 Histaminergic mechanisms in brain. *Annu Rev Pharmacol Toxicol* 17:325–339
  158. Marcus GJ, Shelesnyak MC 1968 Studies on the mechanism of nidation. 33. Coital elevation of uterine histamine content. *Acta Endocrinol (Copenh)* 57:136–141
  159. Shelesnyak MC 1957 Some experimental studies on the mechanism of ova-implantation in the rat. *Recent Prog Horm Res* 13:269–317; discussion 317–322
  160. Padilla L, Reinicke K, Montesino H, Villena F, Asencio H, Cruz M, Rudolph MI 1990 Histamine content and mast cells distribution in mouse uterus: the effect of sexual hormones, gestation and labor. *Cell Mol Biol* 36:93–100
  161. Spaziani E 1963 Relationship between early vascular responses and



- growth in the rat uterus: stimulation of cell division by estradiol and vasodilating amines. *Endocrinology* 72:180–188
162. **Marcus GJ, Kracier PF, Shelesnyak MC** 1963 Studies on the mechanism of decidualization. II. The histamine releasing of pyrazine. *J Reprod Fertil* 5:409–415
  163. **Dey SK, Villanueva C, Chien SM, Crist RD** 1978 The role of histamine in implantation in the rabbit. *J Reprod Fertil* 53:23–26
  164. **Inoue I, Yanai K, Kitamura D, Taniuchi I, Kobayashi T, Niimura K, Watanabe T, Watanabe T** 1996 Impaired locomotor activity and exploratory behavior in mice lacking histamine H1 receptors. *Proc Natl Acad Sci USA* 93:13316–13320
  165. **Kobayashi T, Tonai S, Ishihara Y, Koga R, Okabe S, Watanabe T** 2000 Abnormal functional and morphological regulation of the gastric mucosa in histamine H2 receptor-deficient mice. *J Clin Invest* 105:1741–1749
  166. **Toyota H, Dugovic C, Koehl M, Laposky AD, Weber C, Ngo K, Wu Y, Lee DH, Yanai K, Sakurai E, Watanabe T, Liu C, Chen J, Barbier AJ, Turek FW, Fung L, Lovenberg TW** 2002 Behavioral characterization of mice lacking histamine H(3) receptors. *Mol Pharmacol* 62:389–397
  167. **Brandon JM, Wallis RM** 1977 Effect of mepyramine, a histamine H1-, and burimamide, a histamine H2-receptor antagonist, on ovum implantation in the rat. *J Reprod Fertil* 50:251–254
  168. **Johnson DC, Dey SK** 1980 Role of histamine in implantation: dexamethasone inhibits estradiol-induced implantation in the rat. *Biol Reprod* 22:1136–1141
  169. **Brandon JM, Bibby MC** 1979 A study of changes in uterine mast cells during early pregnancy in the rat. *Biol Reprod* 20:977–980
  170. **Salamonsen LA, Jeziorska M, Newlands GF, Dey SK, Woolley DE** 1996 Evidence against a significant role for mast cells in blastocyst implantation in the rat and mouse. *Reprod Fertil Dev* 8:1157–1164
  171. **Paria BC, Das N, Das SK, Zhao X, Dileepan KN, Dey SK** 1998 Histidine decarboxylase gene in the mouse uterus is regulated by progesterone and correlates with uterine differentiation for blastocyst implantation. *Endocrinology* 139:3958–3966
  172. **Ohtsu H, Tanaka S, Terui T, Hori Y, Makabe K, Pejler G, Tchoougounova E, Hellman L, Gertsenstein M, Hirasawa N, Sakurai E, Buzas E, Kovacs P, Csaba G, Kittel A, Okada M, Hara M, Mar L, Numayama T, Ishigaki S, Ohuchi K, Ichikawa A, Falus A, Watanabe T, Nagy A** 2001 Mice lacking histidine decarboxylase exhibit abnormal mast cells. *FEBS Lett* 502:53–56
  173. **Smith WL, Dewitt DL** 1996 Prostaglandin endoperoxide H synthases-1 and -2. *Adv Immunol* 62:167–215
  174. **Forman BM, Chen J, Evans RM** 1997 Hypolipidemic drugs, polyunsaturated fatty acids, and eicosanoids are ligands for peroxisome proliferator-activated receptors  $\alpha$  and  $\delta$ . *Proc Natl Acad Sci USA* 94:4312–4317
  175. **Forman BM, Tontonoz P, Chen J, Brun RP, Spiegelman BM, Evans RM** 1995 15-Deoxy- $\delta$  12,14-prostaglandin J2 is a ligand for the adipocyte determination factor PPAR  $\gamma$ . *Cell* 83:803–812
  176. **Kliwer SA, Umesono K, Noonan DJ, Heyman RA, Evans RM** 1992 Convergence of 9-cis retinoic acid and peroxisome proliferator signalling pathways through heterodimer formation of their receptors. *Nature* 358:771–774
  177. **Kliwer SA, Forman BM, Blumberg B, Ong ES, Borgmeyer U, Mangelsdorf DJ, Umesono K, Evans RM** 1994 Differential expression and activation of a family of murine peroxisome proliferator-activated receptors. *Proc Natl Acad Sci USA* 91:7355–7359
  178. **Copeland RA, Williams JM, Giannaras J, Nurnberg S, Covington M, Pinto D, Pick S, Trzaskos JM** 1994 Mechanism of selective inhibition of the inducible isoform of prostaglandin G/H synthase. *Proc Natl Acad Sci USA* 91:11202–11206
  179. **Kurumbail RG, Stevens AM, Gierse JK, McDonald JJ, Stegeman RA, Pak JY, Gildehaus D, Miyashiro JM, Penning TD, Seibert K, Isakson PC, Stallings WC** 1996 Structural basis for selective inhibition of cyclooxygenase-2 by anti-inflammatory agents. *Nature* 384:644–648
  180. **DuBois RN, Radhika A, Reddy BS, Entingh AJ** 1996 Increased cyclooxygenase-2 levels in carcinogen-induced rat colonic tumors. *Gastroenterology* 110:1259–1262
  181. **Oshima M, Dinchuk JE, Kargman SL, Oshima H, Hancock B, Kwong E, Trzaskos JM, Evans JF, Taketo MM** 1996 Suppression of intestinal polyposis in Apc  $\delta$ 716 knockout mice by inhibition of cyclooxygenase 2 (COX-2). *Cell* 87:803–809
  182. **Espey LL** 1994 Current status of the hypothesis that mammalian ovulation is comparable to an inflammatory reaction. *Biol Reprod* 50:233–238
  183. **McMaster MT, Dey SK, Andrews GK** 1993 Association of monocytes and neutrophils with early events of blastocyst implantation in mice. *J Reprod Fertil* 99:561–569
  184. **Sirois J** 1994 Induction of prostaglandin endoperoxide synthase-2 by human chorionic gonadotropin in bovine preovulatory follicles *in vivo*. *Endocrinology* 135:841–848
  185. **Chakraborty I, Das SK, Wang J, Dey SK** 1996 Developmental expression of the cyclo-oxygenase-1 and cyclo-oxygenase-2 genes in the peri-implantation mouse uterus and their differential regulation by the blastocyst and ovarian steroids. *J Mol Endocrinol* 16:107–122
  186. **Dinchuk JE, Car BD, Focht RJ, Johnston JJ, Jaffee BD, Covington MB, Contel NR, Eng VM, Collins RJ, Czerniak PM** 1995 Renal abnormalities and an altered inflammatory response in mice lacking cyclooxygenase II. *Nature* 378:406–409
  187. **Langenbach R, Morham SG, Tiano HF, Loftin CD, Ghanayem BI, Chulada PC, Mahler JF, Lee CA, Goulding EH, Kluckman KD** 1995 Prostaglandin synthase 1 gene disruption in mice reduces arachidonic acid-induced inflammation and indomethacin-induced gastric ulceration. *Cell* 83:483–492
  188. **Lim H, Paria BC, Das SK, Dinchuk JE, Langenbach R, Trzaskos JM, Dey SK** 1997 Multiple female reproductive failures in cyclooxygenase 2-deficient mice. *Cell* 91:197–208
  189. **Reese J, Brown N, Paria BC, Morrow J, Dey SK** 1999 COX-2 compensation in the uterus of COX-1 deficient mice during the pre-implantation period. *Mol Cell Endocrinol* 150:23–31
  190. **Lim H, Gupta RA, Ma WG, Paria BC, Moller DE, Morrow JD, DuBois RN, Trzaskos JM, Dey SK** 1999 Cyclo-oxygenase-2-derived prostacyclin mediates embryo implantation in the mouse via PPAR $\delta$ . *Genes Dev* 13:1561–1574
  191. **Clark JD, Schievella AR, Nalefski EA, Lin LL** 1995 Cytosolic phospholipase A2. *J Lipid Mediat Cell Signal* 12:83–117
  192. **Bonventre JV, Huang Z, Taheri MR, Leary E, Li E, Moskowitz MA, Sapirstein A** 1997 Reduced fertility and postschaemic brain injury in mice deficient in cytosolic phospholipase A2. *Nature* 390:622–625
  193. **Uozumi N, Kume K, Nagase T, Nakatani N, Ishii S, Tashiro F, Komagata Y, Maki K, Ikuta K, Ouchi Y, Miyazaki J, Shimizu T** 1997 Role of cytosolic phospholipase A2 in allergic response and parturition. *Nature* 390:618–622
  194. **Cheng JG, Stewart CL** 2003 Loss of cyclooxygenase-2 retards decidual growth but does not inhibit embryo implantation or development to term. *Biol Reprod* 68:401–404
  195. **Charpigny G, Reinaud P, Tamby JP, Creminon C, Guillomot M** 1997 Cyclooxygenase-2 unlike cyclooxygenase-1 is highly expressed in ovine embryos during the implantation period. *Biol Reprod* 57:1032–1040
  196. **Das SK, Wang J, Dey SK, Mead RA** 1999 Spatiotemporal expression of cyclooxygenase 1 and cyclooxygenase 2 during delayed implantation and the periimplantation period in the Western spotted skunk. *Biol Reprod* 60:893–899
  197. **Song JH, Sirois J, Houde A, Murphy BD** 1998 Cloning, developmental expression, and immunohistochemistry of cyclooxygenase 2 in the endometrium during embryo implantation and gestation in the mink (*Mustela vison*). *Endocrinology* 139:3629–3636
  198. **Kim JJ, Wang J, Bamba C, Das SK, Dey SK, Fazleabas AT** 1999 Expression of cyclooxygenase-1 and -2 in the baboon endometrium during the menstrual cycle and pregnancy. *Endocrinology* 140:2672–2678
  199. **Critchley HO, Jones RL, Lea RG, Drudy TA, Kelly RW, Williams AR, Baird DT** 1999 Role of inflammatory mediators in human endometrium during progesterone withdrawal and early pregnancy. *J Clin Endocrinol Metab* 84:240–248
  200. **Marions L, Danielsson KG** 1999 Expression of cyclo-oxygenase in human endometrium during the implantation period. *Mol Hum Reprod* 5:961–965
  201. **Wang H, Ma WG, Tejada L, Zhang H, Morrow J, Das SK, Dey SK** 2004 Rescue of female infertility from the loss of cyclooxygenase-2

- by compensatory upregulation of cyclooxygenase-1 is a function of genetic background. *J Biol Chem* 279:10649–10658
202. **Lim H, Dey SK** 1999 PPAR  $\delta$  functions as a prostacyclin receptor in blastocyst implantation. *Trends Endocrinol Metab* 11:137–142
  203. **Yang ZM, Das SK, Wang J, Sugimoto Y, Ichikawa A, Dey SK** 1997 Potential sites of prostaglandin actions in the periimplantation mouse uterus: differential expression and regulation of prostaglandin receptor genes. *Biol Reprod* 56:368–379
  204. **Ni H, Sun T, Ma XH, Yang ZM** 2003 Expression and regulation of cytosolic prostaglandin E synthase in mouse uterus during the peri-implantation period. *Biol Reprod* 68:744–750
  205. **Ni H, Sun T, Ding NZ, Ma XH, Yang ZM** 2002 Differential expression of microsomal prostaglandin E synthase at implantation sites and in decidual cells of mouse uterus. *Biol Reprod* 67:351–358
  206. **Kennedy TG** 1985 Evidence for the involvement of prostaglandins throughout the decidual cell reaction in the rat. *Biol Reprod* 33:140–146
  207. **Racowsky C, Biggers JD** 1983 Are blastocyst prostaglandins produced endogenously? *Biol Reprod* 29:379–388
  208. **Reese J, Paria BC, Brown N, Zhao X, Morrow JD, Dey SK** 2000 Coordinated regulation of fetal and maternal prostaglandins directs successful birth and postnatal adaptation in the mouse. *Proc Natl Acad Sci USA* 97:9759–9764
  209. **Cross JC, Werb Z, Fisher SJ** 1994 Implantation and the placenta: key pieces of the development puzzle. *Science* 266:1508–1518
  210. **Tazuke SI, Giudice LC** 1996 Growth factors and cytokines in endometrium, embryonic development, and maternal: embryonic interactions. *Semin Reprod Endocrinol* 14:231–245
  211. **Das SK, Das N, Wang J, Lim H, Schryver B, Plowman GD, Dey SK** 1997 Expression of betacellulin and epiregulin genes in the mouse uterus temporally by the blastocyst solely at the site of its apposition is coincident with the “window” of implantation. *Dev Biol* 190:178–190
  212. **Das SK, Chakraborty I, Paria BC, Wang XN, Plowman G, Dey SK** 1995 Amphiregulin is an implantation-specific and progesterone-regulated gene in the mouse uterus. *Mol Endocrinol* 9:691–705
  213. **Luetteke NC, Qiu TH, Peiffer RL, Oliver P, Smithies O, Lee DC** 1993 TGF $\alpha$  deficiency results in hair follicle and eye abnormalities in targeted and waved-1 mice. *Cell* 73:263–278
  214. **Luetteke NC, Qiu TH, Fenton SE, Troyer KL, Riedel RF, Chang A, Lee DC** 1999 Targeted inactivation of the EGF and amphiregulin genes reveals distinct roles for EGF receptor ligands in mouse mammary gland development. *Development* 126:2739–2750
  215. **Olayioye MA, Neve RM, Lane HA, Hynes NE** 2000 The ErbB signaling network: receptor heterodimerization in development and cancer. *EMBO J* 19:3159–3167
  216. **Harvey MB, Leco KJ, Arcellana P, Zhang X, Edwards DR, Schultz GA** 1995 Roles of growth factors during peri-implantation development. *Hum Reprod* 10:712–718
  217. **Rappolee DA, Brenner CA, Schultz R, Mark D, Werb Z** 1988 Developmental expression of PDGF, TGF- $\alpha$ , and TGF- $\beta$  genes in preimplantation mouse embryos. *Science* 241:1823–1825
  218. **Paria BC, Elenius K, Klagsbrun M, Dey SK** 1999 Heparin-binding EGF-like growth factor interacts with mouse blastocysts independently of ErbB1: a possible role for heparan sulfate proteoglycans and ErbB4 in blastocyst implantation. *Development* 126:1997–2005
  219. **Das SK, Tsukamura H, Paria BC, Andrews GK, Dey SK** 1994 Differential expression of epidermal growth factor receptor (EGF-R) gene and regulation of EGF-R bioactivity by progesterone and estrogen in the adult mouse uterus. *Endocrinology* 134:971–981
  220. **Iwamoto R, Yamazaki S, Asakura M, Takashima S, Hasuwa H, Miyado K, Adachi S, Kitakaze M, Hashimoto K, Raab G, Nanba D, Higashiyama S, Hori M, Klagsbrun M, Mekada E** 2003 Heparin-binding EGF-like growth factor and ErbB signaling is essential for heart function. *Proc Natl Acad Sci USA* 100:3221–3226
  221. **Gassmann M, Casagrande F, Orioli D, Simon H, Lai C, Klein R, Lemke G** 1995 Aberrant neural and cardiac development in mice lacking the ErbB4 neuregulin receptor. *Nature* 378:390–394
  222. **Threadgill DW, Dlugosz AA, Hansen LA, Tennenbaum T, Lichti U, Yee D, LaMantia C, Mouton T, Herrup K, Harris RC** 1995 Targeted disruption of mouse EGF receptor: effect of genetic background on mutant phenotype. *Science* 269:230–234
  223. **Yoo HJ, Barlow DH, Mardon HJ** 1997 Temporal and spatial regulation of expression of heparin-binding epidermal growth factor-like growth factor in the human endometrium: a possible role in blastocyst implantation. *Dev Genet* 21:102–108
  224. **Leach RE, Khalifa R, Ramirez ND, Das SK, Wang J, Dey SK, Romero R, Armant DR** 1999 Multiple roles for heparin-binding epidermal growth factor-like growth factor are suggested by its cell-specific expression during the human endometrial cycle and early placentation. *J Clin Endocrinol Metab* 84:3355–3363
  225. **Martin KL, Barlow DH, Sargent IL** 1998 Heparin-binding epidermal growth factor significantly improves human blastocyst development and hatching in serum-free medium. *Hum Reprod* 13:1645–1652
  226. **Chard T** 1995 Cytokines in implantation. *Hum Reprod Update* 1:385–396
  227. **Pollard JW, Hunt JS, Wiktor J, Stanley ER** 1991 A pregnancy defect in the osteopetrotic (op/op) mouse demonstrates the requirement for CSF-1 in female fertility. *Dev Biol* 148:273–283
  228. **Stewart CL, Kaspar P, Brunet LJ, Bhatt H, Gadi I, Kontgen F, Abbondanzo SJ** 1992 Blastocyst implantation depends on maternal expression of leukaemia inhibitory factor. *Nature* 359:76–79
  229. **Robb L, Li R, Hartley L, Nandurkar HH, Koentgen F, Begley CG** 1998 Infertility in female mice lacking the receptor for interleukin 11 is due to a defective uterine response to implantation. *Nat Med* 4:303–308
  230. **Escary JL, Perreau J, Dumenil D, Ezine S, Brulet P** 1993 Leukaemia inhibitory factor is necessary for maintenance of haematopoietic stem cells and thymocyte stimulation. *Nature* 363:361–364
  231. **Kishimoto T, Taga T, Akira S** 1994 Cytokine signal transduction. *Cell* 76:253–262
  232. **Song H, Lim H, Das SK, Paria BC, Dey SK** 2000 Dysregulation of EGF family of growth factors and COX-2 in the uterus during the preattachment and attachment reactions of the blastocyst with the luminal epithelium correlates with implantation failure in LIF-deficient mice. *Mol Endocrinol* 14:1147–1161
  233. **Rathjen PD, Toth S, Willis A, Heath JK, Smith AG** 1990 Differentiation inhibiting activity is produced in matrix-associated and diffusible forms that are generated by alternate promoter usage. *Cell* 62:1105–1114
  234. **Narazaki M, Witthuhn BA, Yoshida K, Silvennoinen O, Yasukawa K, Ihle JN, Kishimoto T, Taga T** 1994 Activation of JAK2 kinase mediated by the interleukin 6 signal transducer gp130. *Proc Natl Acad Sci USA* 91:2285–2289
  235. **Layton MJ, Lock P, Metcalf D, Nicola NA** 1994 Cross-species receptor binding characteristics of human and mouse leukemia inhibitory factor suggest a complex binding interaction. *J Biol Chem* 269:17048–17055
  236. **Bhatt H, Brunet LJ, Stewart CL** 1991 Uterine expression of leukemia inhibitory factor coincides with the onset of blastocyst implantation. *Proc Natl Acad Sci USA* 88:11408–11412
  237. **Ernst M, Inglese M, Waring P, Campbell IK, Bao S, Clay FJ, Alexander WS, Wicks IP, Tarlinton DM, Novak U, Heath JK, Dunn AR** 2001 Defective gp130-mediated signal transducer and activator of transcription (STAT) signaling results in degenerative joint disease, gastrointestinal ulceration, and failure of uterine implantation. *J Exp Med* 194:189–203
  238. **Fry RC** 1992 The effect of leukaemia inhibitory factor (LIF) on embryogenesis. *Reprod Fertil Dev* 4:449–458
  239. **Dunglison GF, Barlow DH, Sargent IL** 1996 Leukaemia inhibitory factor significantly enhances the blastocyst formation rates of human embryos cultured in serum-free medium. *Hum Reprod* 11:191–196
  240. **Nichols J, Davidson D, Taga T, Yoshida K, Chambers I, Smith A** 1996 Complementary tissue-specific expression of LIF and LIF-receptor mRNAs in early mouse embryogenesis. *Mech Dev* 57:123–131
  241. **Ware CB, Horowitz MC, Renshaw BR, Hunt JS, Liggitt D, Koblar SA, Gliniak BC, McKenna HJ, Papayannopoulou T, Thoma B** 1995 Targeted disruption of the low-affinity leukemia inhibitory factor receptor gene causes placental, skeletal, neural and metabolic defects and results in perinatal death. *Development* 121:1283–1299
  242. **Yoshida K, Taga T, Saito M, Suematsu S, Kumanogoh A, Tanaka T, Fujiwara H, Hirata M, Yamagami T, Nakahata T, Hirabayashi T, Yoneda Y, Tanaka K, Wang WZ, Mori C, Shiota K, Yoshida N,**



- Kishimoto T** 1996 Targeted disruption of gp130, a common signal transducer for the interleukin 6 family of cytokines, leads to myocardial and hematological disorders. *Proc Natl Acad Sci USA* 93:407–411
243. **Shen MM, Leder P** 1992 Leukemia inhibitory factor is expressed by the preimplantation uterus and selectively blocks primitive ectoderm formation *in vitro*. *Proc Natl Acad Sci USA* 89:8240–8244
244. **Yang ZM, Chen DB, Le SP, Harper MJ** 1996 Differential hormonal regulation of leukemia inhibitory factor (LIF) in rabbit and mouse uterus. *Mol Reprod Dev* 43:470–476
245. **Arici A, Engin O, Attar E, Olive DL** 1995 Modulation of leukemia inhibitory factor gene expression and protein biosynthesis in human endometrium. *J Clin Endocrinol Metab* 80:1908–1915
246. **Hambartsumian E** 1998 Endometrial leukemia inhibitory factor (LIF) as a possible cause of unexplained infertility and multiple failures of implantation. *Am J Reprod Immunol* 39:137–143
247. **Krumlauf R** 1994 Hox genes in vertebrate development. *Cell* 78:191–201
248. **Benson GV, Lim H, Paria BC, Satokata I, Dey SK, Maas RL** 1996 Mechanisms of reduced fertility in Hoxa-10 mutant mice: uterine homeosis and loss of maternal Hoxa-10 expression. *Development* 122:2687–2696
249. **Hsieh L, Witte DP, Weinstein M, Branford W, Li H, Small K, Potter SS** 1995 Hoxa 11 structure, extensive antisense transcription, and function in male and female fertility. *Development* 121:1373–1385
250. **Gendron RL, Paradis H, Hsieh L, Lee DW, Potter SS, Markoff E** 1997 Abnormal uterine stromal and glandular function associated with maternal reproductive defects in Hoxa-11 null mice. *Biol Reprod* 56:1097–1105
251. **Lim H, Ma L, Ma WG, Maas RL, Dey SK** 1999 Hoxa-10 regulates uterine stromal cell responsiveness to progesterone during implantation and decidualization in the mouse. *Mol Endocrinol* 13:1005–1017
252. **Das SK, Lim H, Paria BC, Dey SK** 1999 Cyclin D3 in the mouse uterus is associated with the decidualization process during early pregnancy. *J Mol Endocrinol* 22:91–101
253. **Yao MW, Lim H, Schust DJ, Choe SE, Farago A, Ding Y, Michaud S, Church GM, Maas RL** 2003 Gene expression profiling reveals progesterone-mediated cell cycle and immunoregulatory roles of hoxa-10 in the preimplantation uterus. *Mol Endocrinol* 17:610–627
254. **Taylor HS, Arici A, Olive D, Igarashi P** 1998 HOXA10 is expressed in response to sex steroids at the time of implantation in the human endometrium. *J Clin Invest* 101:1379–1384
255. **Wang W, Van D, Lufkin T** 1998 Inner ear and maternal reproductive defects in mice lacking the Hmx3 homeobox gene. *Development* 125:621–634
256. **Desvergne B, Wahli W** 1999 Peroxisome proliferator-activated receptors: nuclear control of metabolism. *Endocr Rev* 20:649–688
257. **Ding NZ, Teng CB, Ma H, Ni H, Ma XH, Xu LB, Yang ZM** 2003 Peroxisome proliferator-activated receptor  $\delta$  expression and regulation in mouse uterus during embryo implantation and decidualization. *Mol Reprod Dev* 66:218–224
258. **Lim H, Dey SK** 2002 A novel pathway of prostacyclin signaling-hanging out with nuclear receptors. *Endocrinology* 143:3207–3210
259. **Barak Y, Liao D, He W, Ong ES, Nelson MC, Olefsky JM, Boland R, Evans RM** 2002 Effects of peroxisome proliferator-activated receptor  $\delta$  on placentation, adiposity, and colorectal cancer. *Proc Natl Acad Sci USA* 99:303–308
260. **Peters JM, Lee SS, Li W, Ward JM, Gavrilova O, Everett C, Reitman ML, Hudson LD, Gonzalez FJ** 2000 Growth, adipose, brain, and skin alterations resulting from targeted disruption of the mouse peroxisome proliferator-activated receptor  $\beta$  ( $\delta$ ). *Mol Cell Biol* 20:5119–5128
261. **Michalik L, Desvergne B, Tan NS, Basu-Modak S, Escher P, Rieusset J, Peters JM, Kaya G, Gonzalez FJ, Zakany J, Metzger D, Chambon P, Duboule D, Wahli W** 2001 Impaired skin wound healing in peroxisome proliferator-activated receptor (PPAR) $\alpha$  and PPAR $\beta$  mutant mice. *J Cell Biol* 154:799–814
262. **Berger J, Moller DE** 2002 The mechanisms of action of PPARs. *Annu Rev Med* 53:409–435
263. **Barak Y, Nelson MC, Ong ES, Jones YZ, Ruiz L, Chien KR, Koder A, Evans RM** 1999 PPAR $\gamma$  is required for placental, cardiac, and adipose tissue development. *Mol Cell* 4:585–595
264. **Cui Y, Miyoshi K, Claudio E, Siebenlist UK, Gonzalez FJ, Flaws J, Wagner KU, Hennighausen L** 2002 Loss of the peroxisome proliferation-activated receptor  $\gamma$  (PPAR $\gamma$ ) does not affect mammary development and propensity for tumor formation but leads to reduced fertility. *J Biol Chem* 277:17830–17835
265. **Muerhoff AS, Griffin KJ, Johnson EF** 1992 The peroxisome proliferator-activated receptor mediates the induction of CYP4A6, a cytochrome P450 fatty acid  $\omega$ -hydroxylase, by clofibrate acid. *J Biol Chem* 267:19051–19053
266. **Tugwood JD, Issemann I, Anderson RG, Bundell KR, McPheat WL, Green S** 1992 The mouse peroxisome proliferator activated receptor recognizes a response element in the 5' flanking sequence of the rat acyl CoA oxidase gene. *EMBO J* 11:433–439
267. **Robyr D, Wolffe AP, Wahli W** 2000 Nuclear hormone receptor coregulators in action: diversity for shared tasks. *Mol Endocrinol* 14:329–347
268. **McKenna NJ, Lanz RB, O'Malley BW** 1999 Nuclear receptor coregulators: cellular and molecular biology. *Endocr Rev* 20:321–344
269. **Yao TP, Oh SP, Fuchs M, Zhou ND, Ch'ng LE, Newsome D, Bronson RT, Li E, Livingston DM, Eckner R** 1998 Gene dosage-dependent embryonic development and proliferation defects in mice lacking the transcriptional integrator p300. *Cell* 93:361–372
270. **Hong H, Kohli K, Trivedi A, Johnson DL, Stallcup MR** 1996 GRIP1, a novel mouse protein that serves as a transcriptional co-activator in yeast for the hormone binding domains of steroid receptors. *Proc Natl Acad Sci USA* 93:4948–4952
271. **Anzick SL, Kononen J, Walker RL, Azorsa DO, Tanner MM, Guan XY, Sauter G, Kallioniemi OP, Trent JM, Meltzer PS** 1997 AIB1, a steroid receptor coactivator amplified in breast and ovarian cancer. *Science* 277:965–968
272. **Xu J, Qiu Y, DeMayo FJ, Tsai SY, Tsai MJ, O'Malley BW** 1998 Partial hormone resistance in mice with disruption of the steroid receptor coactivator-1 (SRC-1) gene. *Science* 279:1922–1925
273. **Gehin M, Mark M, Dennefeld C, Dierich A, Gronemeyer H, Chambon P** 2002 The function of TIF2/GRIP1 in mouse reproduction is distinct from those of SRC-1 and p/CIP. *Mol Cell Biol* 22:5923–5937
274. **Xu J, Liao L, Ning G, Yoshida K, Deng C, O'Malley BW** 2000 The steroid receptor coactivator SRC-3 (p/CIP/RAC3/AIB1/ACTR/TRAM-1) is required for normal growth, puberty, female reproductive function, and mammary gland development. *Proc Natl Acad Sci USA* 97:6379–6384
275. **Yuan CX, Ito M, Fondell JD, Fu ZY, Roeder RG** 1998 The TRAP220 component of a thyroid hormone receptor-associated protein (TRAP) coactivator complex interacts directly with nuclear receptors in a ligand-dependent fashion. *Proc Natl Acad Sci USA* 95:7939–7944
276. **Rachez C, Lemon BD, Suldan Z, Bromleigh V, Gamble M, Naar AM, Erdjument B, Tempst P, Freedman LP** 1999 Ligand-dependent transcription activation by nuclear receptors requires the DRIP complex. *Nature* 398:824–828
277. **Zhu Y, Qi C, Jain S, Rao MS, Reddy JK** 1997 Isolation and characterization of PBP, a protein that interacts with peroxisome proliferator-activated receptor. *J Biol Chem* 272:25500–25506
278. **Zhu Y, Qi C, Jain S, Le B, Espinosa R, Atkins GB, Lazar MA, Yeldandi AV, Rao MS, Reddy JK** 1999 Amplification and overexpression of peroxisome proliferator-activated receptor binding protein (PBP/PPARBP) gene in breast cancer. *Proc Natl Acad Sci USA* 96:10848–10853
279. **Zhu Y, Qi C, Jia Y, Nye JS, Rao MS, Reddy JK** 2000 Deletion of PBP/PPARBP, the gene for nuclear receptor coactivator peroxisome proliferator-activated receptor-binding protein, results in embryonic lethality. *J Biol Chem* 275:14779–14782
280. **Ito M, Yuan CX, Okano HJ, Darnell RB, Roeder RG** 2000 Involvement of the TRAP220 component of the TRAP/SMCC coactivator complex in embryonic development and thyroid hormone action. *Mol Cell* 5:683–693
281. **Zhu Y, Kan L, Qi C, Kanwar YS, Yeldandi AV, Rao MS, Reddy JK** 2000 Isolation and characterization of peroxisome proliferator-activated receptor (PPAR) interacting protein (PRIP) as a coactivator for PPAR. *J Biol Chem* 275:13510–13516



282. Caira F, Antonson P, Pelto H, Treuter E, Gustafsson JA 2000 Cloning and characterization of RAP250, a novel nuclear receptor coactivator. *J Biol Chem* 275:5308–5317
283. Kuang SQ, Liao L, Zhang H, Pereira FA, Yuan Y, DeMayo FJ, Ko L, Xu J 2002 Deletion of the cancer-amplified coactivator AIB3 results in defective placentation and embryonic lethality. *J Biol Chem* 277:45356–45360
284. Antonson P, Schuster GU, Wang L, Rozell B, Holter E, Flodby P, Treuter E, Holmgren L, Gustafsson JA 2003 Inactivation of the nuclear receptor coactivator RAP250 in mice results in placental vascular dysfunction. *Mol Cell Biol* 23:1260–1268
285. Treuter E, Albrektsen T, Johansson L, Leers J, Gustafsson JA 1998 A regulatory role for RIP140 in nuclear receptor activation. *Mol Endocrinol* 12:864–881
286. Lee CH, Chinpaisal C, Wei LN 1998 Cloning and characterization of mouse RIP140, a corepressor for nuclear orphan receptor TR2. *Mol Cell Biol* 18:6745–6755
287. White R, Leonardsson G, Rosewell I, Ann J, Milligan S, Parker M 2000 The nuclear receptor co-repressor nrip1 (RIP140) is essential for female fertility. *Nat Med* 6:1368–1374
288. Leonardsson G, Jacobs MA, White R, Jeffery R, Poulson R, Milligan S, Parker M 2002 Embryo transfer experiments and ovarian transplantation identify the ovary as the only site in which nuclear receptor interacting protein 1/RIP140 action is crucial for female fertility. *Endocrinology* 143:700–707
289. Sachs L, Shelesnyak MC 1955 The development and suppression of polyploidy in the developing and suppressed deciduoma in the rat. *J Endocrinol* 12:146–151
290. Leroy F, Bogaert C, Van H, Delcroix C 1974 Cytophotometric and autoradiographic evaluation of cell kinetics in decidual growth in rats. *J Reprod Fertil* 38:441–449
291. Ansell JD, Barlow PW, McLaren A 1974 Binucleate and polyploid cells in the decidua of the mouse. *J Embryol Exp Morphol* 31:223–227
292. Sherr CJ 1993 Mammalian G1 cyclins. *Cell* 73:1059–1065
293. Riley DJ, Lee EY, Lee WH 1994 The retinoblastoma protein: more than a tumor suppressor. *Annu Rev Cell Biol* 10:1–29
294. Resnitzky D, Gossen M, Bujard H, Reed SI 1994 Acceleration of the G1/S phase transition by expression of cyclins D1 and E with an inducible system. *Mol Cell Biol* 14:1669–1679
295. Sherr CJ, Roberts JM 1999 CDK inhibitors: positive and negative regulators of G1-phase progression. *Genes Dev* 13:1501–1512
296. Shiozawa T, Li SF, Nakayama K, Nikaido T, Fujii S 1996 Relationship between the expression of cyclins/cyclin-dependent kinases and sex-steroid receptors/Ki67 in normal human endometrial glands and stroma during the menstrual cycle. *Mol Hum Reprod* 2:745–752
297. Shiozawa T, Nikaido T, Nakayama K, Lu X, Fujii S 1998 Involvement of cyclin-dependent kinase inhibitor p27Kip1 in growth inhibition of endometrium in the secretory phase and of hyperplastic endometrium treated with progesterone. *Mol Hum Reprod* 4:899–905
298. Geum D, Sun W, Paik SK, Lee CC, Kim K 1997 Estrogen-induced cyclin D1 and D3 gene expressions during mouse uterine cell proliferation in vivo: differential induction mechanism of cyclin D1 and D3. *Mol Reprod Dev* 46:450–458
299. Altucci L, Addeo R, Cicatiello L, Germano D, Pacilio C, Battista T, Cancemi M, Petrizzi VB, Bresciani F, Weisz A 1997 Estrogen induces early and timed activation of cyclin-dependent kinases 4, 5, and 6 and increases cyclin messenger ribonucleic acid expression in rat uterus. *Endocrinology* 138:978–984
300. Prall OW, Sarcevic B, Musgrove EA, Watts CK, Sutherland RL 1997 Estrogen-induced activation of Cdk4 and Cdk2 during G1-S phase progression is accompanied by increased cyclin D1 expression and decreased cyclin-dependent kinase inhibitor association with cyclin E-Cdk2. *J Biol Chem* 272:10882–10894
301. Musgrove EA, Swarbrick A, Lee CS, Cornish AL, Sutherland RL 1998 Mechanisms of cyclin-dependent kinase inactivation by progestins. *Mol Cell Biol* 18:1812–1825
302. Jones SR, Kimler BF, Justice WM, Rider V 2000 Transit of normal rat uterine stromal cells through G1 phase of the cell cycle requires progesterone-growth factor interactions. *Endocrinology* 141:637–648
303. Bamberger A, Sudahl S, Bamberger CM, Schulte HM, Loning T 1999 Expression patterns of the cell-cycle inhibitor p27 and the cell-cycle promoter cyclin E in the human placenta throughout gestation: implications for the control of proliferation. *Placenta* 20:401–406.
304. MacAuley A, Cross JC, Werb Z 1998 Reprogramming the cell cycle for endoreduplication in rodent trophoblast cells. *Mol Biol Cell* 9:795–807
305. Tan J, Raja S, Davis MK, Tawfik O, Dey SK, Das SK 2002 Evidence for coordinated interaction of cyclin D3 with p21 and cdk6 in directing the development of uterine stromal cell decidualization and polyploidy during implantation. *Mech Dev* 111:99–113
306. Tan Y, Li M, Cox S, Davis MK, Tawfik O, Paria BC, Das SK 2004 HB-EGF directs stromal cell polyploidy and decidualization via cyclin D3 during implantation. *Dev Biol* 265:181–195
307. Aplin JD, Charlton AK, Ayad S 1988 An immunohistochemical study of human endometrial extracellular matrix during the menstrual cycle and first trimester of pregnancy. *Cell Tissue Res* 253:231–240
308. Das SK, Yano S, Wang J, Edwards DR, Nagase H, Dey SK 1997 Expression of matrix metalloproteinases and tissue inhibitors of metalloproteinases in the mouse uterus during the peri-implantation period. *Dev Genet* 21:44–54
309. Vu TH, Werb Z 2000 Matrix metalloproteinases: effectors of development and normal physiology. *Genes Dev* 14:2123–2133
310. Folkman J 1995 Angiogenesis in cancer, vascular, rheumatoid and other disease. *Nat Med* 1:27–31
311. Halder JB, Zhao X, Soker S, Paria BC, Klagsbrun M, Das SK, Dey SK 2000 Differential expression of VEGF isoforms and VEGF(164)-specific receptor neuropilin-1 in the mouse uterus suggests a role for VEGF(164) in vascular permeability and angiogenesis during implantation. *Genesis* 26:213–224
312. Hyder SM, Stancel GM 1999 Regulation of angiogenic growth factors in the female reproductive tract by estrogens and progestins. *Mol Endocrinol* 13:806–811
313. Chakraborty I, Das SK, Dey SK 1995 Differential expression of vascular endothelial growth factor and its receptor mRNAs in the mouse uterus around the time of implantation. *J Endocrinol* 147:339–352
314. Ferrara N, Davis S 1997 The biology of vascular endothelial growth factor. *Endocr Rev* 18:4–25
315. Carmeliet P, Ferreira V, Breier G, Pollefeyt S, Kieckens L, Gertsenstein M, Fahrig M, Vandenhoeck A, Harpal K, Eberhardt C, Declercq C, Pawling J, Moons L, Collen D, Risau W, Nagy A 1996 Abnormal blood vessel development and lethality in embryos lacking a single VEGF allele. *Nature* 380:435–439
316. Ferrara N, Carver M, Chen H, Dowd M, Lu L, Shea KS, Powell B, Hillan KJ, Moore MW 1996 Heterozygous embryonic lethality induced by targeted inactivation of the VEGF gene. *Nature* 380:439–442
317. Tischer E, Mitchell R, Hartman T, Silva M, Gospodarowicz D, Fiddes JC, Abraham JA 1991 The human gene for vascular endothelial growth factor. Multiple protein forms are encoded through alternative exon splicing. *J Biol Chem* 266:11947–11954
318. Peters KG, De V, Williams LT 1993 Vascular endothelial growth factor receptor expression during embryogenesis and tissue repair suggests a role in endothelial differentiation and blood vessel growth. *Proc Natl Acad Sci USA* 90:8915–8919
319. Shibuya M, Yamaguchi S, Yamane A, Ikeda T, Tojo A, Matsushima H, Sato M 1990 Nucleotide sequence and expression of a novel human receptor-type tyrosine kinase gene (flt) closely related to the fms family. *Oncogene* 5:519–524
320. Millauer B, Witzigmann V, Schnurch H, Martinez R, Moller NP, Risau W, Ullrich A 1993 High affinity VEGF binding and developmental expression suggest Flk-1 as a major regulator of vasculogenesis and angiogenesis. *Cell* 72:835–846
321. Quinn TP, Peters KG, De V, Ferrara N, Williams LT 1993 Fetal liver kinase 1 is a receptor for vascular endothelial growth factor and is selectively expressed in vascular endothelium. *Proc Natl Acad Sci USA* 90:7533–7537
322. Fong GH, Rossant J, Gertsenstein M, Breitman ML 1995 Role of the Flt-1 receptor tyrosine kinase in regulating the assembly of vascular endothelium. *Nature* 376:66–70

323. **Waltenberger J, Claesson W, Siegbahn A, Shibuya M, Heldin CH** 1994 Different signal transduction properties of KDR and Flt1, two receptors for vascular endothelial growth factor. *J Biol Chem* 269:26988–26995
324. **Yoshida A, Anand A, Zetter BR** 1996 Differential endothelial migration and proliferation to basic fibroblast growth factor and vascular endothelial growth factor. *Growth Factors* 13:57–64
325. **Shalaby F, Rossant J, Yamaguchi TP, Gertsenstein M, Wu XF, Breitman ML, Schuh AC** 1995 Failure of blood-island formation and vasculogenesis in Flk-1-deficient mice. *Nature* 376:62–66
326. **Kawakami A, Kitsukawa T, Takagi S, Fujisawa H** 1996 Developmentally regulated expression of a cell surface protein, neuropilin, in the mouse nervous system. *J Neurobiol* 29:1–17
327. **Takagi S, Kasuya Y, Shimizu M, Matsuura T, Tsuboi M, Kawakami A, Fujisawa H** 1995 Expression of a cell adhesion molecule, neuropilin, in the developing chick nervous system. *Dev Biol* 170:207–222
328. **He Z, Tessier L** 1997 Neuropilin is a receptor for the axonal chemorepellent Semaphorin III. *Cell* 90:739–751
329. **Kolodkin AL, Levengood DV, Rowe EG, Tai YT, Giger RJ, Ginty DD** 1997 Neuropilin is a semaphorin III receptor. *Cell* 90:753–762
330. **Neufeld G, Tessler S, Gitay G, Cohen T, Levi BZ** 1994 Vascular endothelial growth factor and its receptors. *Prog Growth Factor Res* 5:89–97
331. **Soker S, Takashima S, Miao HQ, Neufeld G, Klagsbrun M** 1998 Neuropilin-1 is expressed by endothelial and tumor cells as an isoform-specific receptor for vascular endothelial growth factor. *Cell* 92:735–745
332. **Kawasaki T, Kitsukawa T, Bekku Y, Matsuda Y, Sanbo M, Yagi T, Fujisawa H** 1999 A requirement for neuropilin-1 in embryonic vessel formation. *Development* 126:4895–4902
333. **Kitsukawa T, Shimono A, Kawakami A, Kondoh H, Fujisawa H** 1995 Overexpression of a membrane protein, neuropilin, in chimeric mice causes anomalies in the cardiovascular system, nervous system and limbs. *Development* 121:4309–4318
334. **Hyder SM, Nawaz Z, Chiappetta C, Stancel GM** 2000 Identification of functional estrogen response elements in the gene coding for the potent angiogenic factor vascular endothelial growth factor. *Cancer Res* 60:3183–3190
335. **Ma W, Tan J, Matsumoto H, Robert B, Abrahamson DR, Das SK, Dey SK** 2001 Adult tissue angiogenesis: evidence for negative regulation by estrogen in the uterus. *Mol Endocrinol* 15:1983–1992
336. **Maisonpierre PC, Suri C, Jones PF, Bartunkova S, Wiegand SJ, Radziejewski C, Compton D, McClain J, Aldrich TH, Papadopoulos N, Daly TJ, Davis S, Sato TN, Yancopoulos GD** 1997 Angiopoietin-2, a natural antagonist for Tie2 that disrupts in vivo angiogenesis. *Science* 277:55–60
337. **Suri C, Jones PF, Patan S, Bartunkova S, Maisonpierre PC, Davis S, Sato TN, Yancopoulos GD** 1996 Requisite role of angiopoietin-1, a ligand for the TIE2 receptor, during embryonic angiogenesis. *Cell* 87:1171–1180
338. **Sato TN, Tozawa Y, Deutsch U, Wolburg B, Fujiwara Y, Gendron M, Gridley T, Wolburg H, Risau W, Qin Y** 1995 Distinct roles of the receptor tyrosine kinases Tie-1 and Tie-2 in blood vessel formation. *Nature* 376:70–74
339. **Thurston G, Suri C, Smith K, McClain J, Sato TN, Yancopoulos GD, McDonald DM** 1999 Leakage-resistant blood vessels in mice transgenically overexpressing angiopoietin-1. *Science* 286:2511–2514
340. **Davis S, Yancopoulos GD** 1999 The angiopoietins: Yin and Yang in angiogenesis. *Curr Top Microbiol Immunol* 237:173–185
341. **Valenzuela DM, Griffiths JA, Rojas J, Aldrich TH, Jones PF, Zhou H, McClain J, Copeland NG, Gilbert DJ, Jenkins NA, Huang T, Papadopoulos N, Maisonpierre PC, Davis S, Yancopoulos GD** 1999 Angiopoietins 3 and 4: diverging gene counterparts in mice and humans. *Proc Natl Acad Sci USA* 96:1904–1909
342. **Matsumoto H, Ma WG, Daikoku T, Zhao X, Paria BC, Das SK, Trzaskos JM, Dey SK** 2002 Cyclooxygenase-2 differentially directs uterine angiogenesis during implantation in mice. *J Biol Chem* 277:29260–29267
343. **Gale NW, Thurston G, Hackett SF, Renard R, Wang Q, McClain J, Martin C, Witte C, Witte MH, Jackson D, Suri C, Campochiaro PA, Wiegand SJ, Yancopoulos GD** 2002 Angiopoietin-2 is required for postnatal angiogenesis and lymphatic patterning, and only the latter role is rescued by angiopoietin-1. *Dev Cell* 3:411–423
344. **Rossant J, Howard L** 2002 Signaling pathways in vascular development. *Annu Rev Cell Dev Biol* 18:541–573
345. **Daikoku T, Matsumoto H, Gupta RA, Das SK, Gassmann M, DuBois RN, Dey SK** 2003 Expression of hypoxia-inducible factors in the peri-implantation mouse uterus is regulated in a cell-specific and ovarian steroid hormone-dependent manner. Evidence for differential function of HIFs during early pregnancy. *J Biol Chem* 278:7683–7691
346. **Matsuda LA, Lolait SJ, Brownstein MJ, Young AC, Bonner TI** 1990 Structure of a cannabinoid receptor and functional expression of the cloned cDNA. *Nature* 346:561–564
347. **Munro S, Thomas KL, Abu S** 1993 Molecular characterization of a peripheral receptor for cannabinoids. *Nature* 365:61–65
348. **Devane WA, Hanus L, Breuer A, Pertwee RG, Stevenson LA, Griffin G, Gibson D, Mandelbaum A, Etinger A, Mechoulam R** 1992 Isolation and structure of a brain constituent that binds to the cannabinoid receptor. *Science* 258:1946–1949
349. **Felder CC, Briley EM, Axelrod J, Simpson JT, Mackie K, Devane WA** 1993 Anandamide, an endogenous cannabimimetic eicosanoid, binds to the cloned human cannabinoid receptor and stimulates receptor-mediated signal transduction. *Proc Natl Acad Sci USA* 90:7656–7660
350. **Schmid PC, Paria BC, Krebsbach RJ, Schmid HH, Dey SK** 1997 Changes in anandamide levels in mouse uterus are associated with uterine receptivity for embryo implantation. *Proc Natl Acad Sci USA* 94:4188–4192
351. **Paria BC, Das SK, Dey SK** 1995 The preimplantation mouse embryo is a target for cannabinoid ligand-receptor signaling. *Proc Natl Acad Sci USA* 92:9460–9464
352. **Yang ZM, Paria BC, Dey SK** 1996 Activation of brain-type cannabinoid receptors interferes with preimplantation mouse embryo development. *Biol Reprod* 55:756–761
353. **Wang J, Paria BC, Dey SK, Arment DR** 1999 Stage-specific excitation of cannabinoid receptor exhibits differential effects on mouse embryonic development. *Biol Reprod* 60:839–844
354. **Wang H, Matsumoto H, Guo Y, Paria BC, Roberts RL, Dey SK** 2003 Differential G protein-coupled cannabinoid receptor signaling by anandamide directs blastocyst activation for implantation. *Proc Natl Acad Sci USA* 100:14914–14919
355. **Maccarrone M, Valensise H, Bari M, Lazzarin N, Romanini C, Finazzi-Agro A** 2000 Relation between decreased anandamide hydrolyase concentrations in human lymphocytes and miscarriage. *Lancet* 355:1326–1329
356. **Maccarrone M, Bisogno T, Valensise H, Lazzarin N, Fezza F, Manna C, Di M, V, Finazzi-Agro A** 2002 Low fatty acid amide hydrolase and high anandamide levels are associated with failure to achieve an ongoing pregnancy after IVF and embryo transfer. *Mol Hum Reprod* 8:188–195
357. **Ingham PW, McMahon AP** 2001 Hedgehog signaling in animal development: paradigms and principles. *Genes Dev* 15:3059–3087
358. **Johnson RL, Scott MP** 1998 New players and puzzles in the hedgehog signaling pathway. *Curr Opin Genet Dev* 8:450–456
359. **McMahon AP** 2000 More surprises in the hedgehog signaling pathway. *Cell* 100:185–188
360. **Matsumoto H, Zhao X, Das SK, Hogan BL, Dey SK** 2002 Indian hedgehog as a progesterone-responsive factor mediating epithelial-mesenchymal interactions in the mouse uterus. *Dev Biol* 245:280–290
361. **Takamoto N, Zhao B, Tsai SY, DeMayo FJ** 2002 Identification of Indian hedgehog as a progesterone-responsive gene in the murine uterus. *Mol Endocrinol* 16:2338–2348
362. **Okulicz WC, Ace CI** 1999 Progesterone-regulated gene expression in the primate endometrium. *Semin Reprod Endocrinol* 17:241–255
363. **Higuchi T, Kanzaki H, Nakayama H, Fujimoto M, Hatayama H, Kojima K, Iwai M, Mori T, Fujita J** 1995 Induction of tissue inhibitor of metalloproteinase 3 gene expression during *in vitro* decidualization of human endometrial stromal cells. *Endocrinology* 136:4973–4981
364. **Bany BM, Schultz GA** 2001 Increased expression of a novel heat shock protein transcript in the mouse uterus during decidualization and in response to progesterone. *Biol Reprod* 64:284–292



365. **Simmons DG, Kennedy TG** 2002 Uterine sensitization-associated gene-1: a novel gene induced within the rat endometrium at the time of uterine receptivity/sensitization for the decidual cell reaction. *Biol Reprod* 67:1638–1645
366. **Gruidl M, Buyuksal A, Babaknia A, Fazleabas AT, Sivarajah S, Satyaswaroop PG, Tabibzadeh S** 1997 The progressive rise in the expression of  $\alpha$  crystallin B chain in human endometrium is initiated during the implantation window: modulation of gene expression by steroid hormones. *Mol Hum Reprod* 3:333–342
367. **Green ML, Blaaser LL, Simmen FA, Simmen RC** 1996 Molecular cloning of spermidine/spermine N1-acetyltransferase from the periimplantation porcine uterus by messenger ribonucleic acid differential display: temporal and conceptus-modulated gene expression. *Endocrinology* 137:5447–5455
368. **Cowan BD, Hines RS, Brackin MN, Case ST** 1999 Temporal and cell-specific gene expression by human endometrium after coculture with trophoblast. *Am J Obstet Gynecol* 180:806–814
369. **Nie GY, Li Y, Hampton AL, Salamonsen LA, Clements JA, Findlay JK** 2000 Identification of monoclonal nonspecific suppressor factor  $\beta$  (mNSF $\beta$ ) as one of the genes differentially expressed at implantation sites compared to interimplantation sites in the mouse uterus. *Mol Reprod Dev* 55:351–363
370. **Simmons DG, Kennedy TG** 2000 Induction of glucose-regulated protein 78 in rat uterine glandular epithelium during uterine sensitization for the decidual cell reaction. *Biol Reprod* 62:1168–1176
371. **Martin J, Dominguez F, Avila S, Castrillo JL, Remohi J, Pellicer A, Simon C** 2002 Human endometrial receptivity: gene regulation. *J Reprod Immunol* 55:131–139
372. **Lee S, Lee SA, Shim C, Khang I, Lee KA, Park YM, Kang BM, Kim K** 2003 Identification of estrogen-regulated genes in the mouse uterus using a delayed-implantation model. *Mol Reprod Dev* 64:405–413
373. **Evans SJ, Datson NA, Kabbaj M, Thompson RC, Vreugdenhil E, De K, Watson SJ, Akil H** 2002 Evaluation of Affymetrix Gene Chip sensitivity in rat hippocampal tissue using SAGE analysis. *Serial analysis of gene expression*. *Eur J Neurosci* 16:409–413
374. **Ishii M, Hashimoto S, Tsutsumi S, Wada Y, Matsushima K, Kodama T, Aburatani H** 2000 Direct comparison of GeneChip and SAGE on the quantitative accuracy in transcript profiling analysis. *Genomics* 68:136–143
375. **Reese J, Das SK, Paria BC, Lim H, Song H, Matsumoto H, Knudtson KL, DuBois RN, Dey SK** 2001 Global gene expression analysis to identify molecular markers of uterine receptivity and embryo implantation. *J Biol Chem* 276:44137–44145
376. **Yoshioka K, Matsuda F, Takakura K, Noda Y, Imakawa K, Sakai S** 2000 Determination of genes involved in the process of implantation: application of GeneChip to scan 6500 genes. *Biochem Biophys Res Commun* 272:531–538
377. **Cheon YP, Li Q, Xu X, DeMayo FJ, Bagchi IC, Bagchi MK** 2002 A genomic approach to identify novel progesterone receptor regulated pathways in the uterus during implantation. *Mol Endocrinol* 16:2853–2871
378. **Andrade PM, Silva ID, Borra RC, de Lima GR, Baracat EC** 2002 Estrogen regulation of uterine genes *in vivo* detected by complementary DNA array. *Horm Metab Res* 34:238–244
379. **Watanabe H, Suzuki A, Mizutani T, Khono S, Lubahn DB, Handa H, Iguchi T** 2002 Genome-wide analysis of changes in early gene expression induced by oestrogen. *Genes Cells* 7:497–507
380. **Lindberg MK, Weihua Z, Andersson N, Moverare S, Gao H, Vidal O, Erlandsson M, Windahl S, Andersson G, Lubahn DB, Carlsten H, Dahlman W, Gustafsson JA, Ohlsson C** 2002 Estrogen receptor specificity for the effects of estrogen in ovariectomized mice. *J Endocrinol* 174:167–178
381. **Naciff JM, Jump ML, Torontali SM, Carr GJ, Tiesman JP, Overmann GJ, Daston GP** 2002 Gene expression profile induced by 17 $\alpha$ -ethynyl estradiol, bisphenol A, and genistein in the developing female reproductive system of the rat. *Toxicol Sci* 68:184–199
382. **Brar AK, Handwerger S, Kessler CA, Aronow BJ** 2001 Gene induction and categorical reprogramming during *in vitro* human endometrial fibroblast decidualization. *Physiol Genomics* 7:135–148
383. **Popovici RM, Kao LC, Giudice LC** 2000 Discovery of new inducible genes in *in vitro* decidualized human endometrial stromal cells using microarray technology. *Endocrinology* 141:3510–3513
384. **Kao LC, Tulac S, Lobo S, Imani B, Yang JP, Germeyer A, Osteen K, Taylor RN, Lessey BA, Giudice LC** 2002 Global gene profiling in human endometrium during the window of implantation. *Endocrinology* 143:2119–2138
385. **Carson DD, Lagow E, Thathiah A, Al S, Farach C, Vernon M, Yuan L, Fritz MA, Lessey B** 2002 Changes in gene expression during the early to mid-luteal (receptive phase) transition in human endometrium detected by high-density microarray screening. *Mol Hum Reprod* 8:871–879
386. **Weitlauf HM** 1994 *Biology of implantation*. In: Knobil E, Neill JD, eds. *The physiology of reproduction*. New York: Raven Press; 391–440
387. **Yoshinaga K** 1972 Rabbit antiserum to rat deciduoma. *Biol Reprod* 6:51–57
388. **Denari JH, Germino NI, Rosner JM** 1976 Early synthesis of uterine proteins after a decidual stimulus in the pseudopregnant rat. *Biol Reprod* 15:1–8
389. **Bell SC, Reynolds S, Heald PJ** 1977 Uterine protein synthesis during the early stages of pregnancy in the rat. *J Reprod Fertil* 49:177–181
390. **Umaphysivam K, Jones WR** 1978 An investigation of decidual specific proteins in the rat. *Int J Fertil* 23:138–142
391. **Lejeune B, Lecocq R, Lamy F, Leroy F** 1982 Changes in the pattern of endometrial protein synthesis during decidualization in the rat. *J Reprod Fertil* 66:519–523
392. **Mulholland J, Vilee CA** 1984 Proteins synthesized by the rat endometrium during early pregnancy. *J Reprod Fertil* 72:395–400
393. **Salamonsen LA, Doughton BW, Findlay JK** 1986 The effects of the preimplantation blastocyst *in vivo* and *in vitro* on protein synthesis and secretion by cultured epithelial cells from sheep endometrium. *Endocrinology* 119:622–628
394. **Weitlauf HM, Suda H** 1988 Changes in secreted uterine proteins associated with embryo implantation in the mouse. *J Reprod Fertil* 84:539–549
395. **Lee RS, Wheeler TT, Peterson AJ** 1998 Large-format, two-dimensional polyacrylamide gel electrophoresis of ovine periimplantation uterine luminal fluid proteins: identification of aldose reductase, cytoplasmic actin, and transferrin as conceptus-synthesized proteins. *Biol Reprod* 59:743–752
396. **Banks RE, Dunn MJ, Forbes MA, Stanley A, Pappin D, Naven T, Gough M, Harnden P, Selby PJ** The potential use of laser capture microdissection to selectively obtain distinct populations of cells for proteomic analysis—preliminary findings. *Electrophoresis* 20:689–700.
397. **Hoang VM, Foulk R, Clauser K, Burlingame A, Gibson BW, Fisher SJ** 2001 Functional proteomics: examining the effects of hypoxia on the cytotrophoblast protein repertoire. *Biochemistry* 40:4077–4086
398. **Cencic A, Henry C, Lefevre F, Huet JC, Koren S, La B** 2002 The porcine trophoblastic interferon- $\gamma$ , secreted by a polarized epithelium, has specific structural and biochemical properties. *Eur J Biochem* 269:2772–2781
399. **Bazer FW, Vallet JL, Ashworth CJ, Anthony RV, Roberts RM** 1987 The role of ovine conceptus secretory proteins in the establishment of pregnancy. *Adv Exp Med Biol* 230:221–235
400. **Perry JS, Heap RB, Amoroso EC** 1973 Steroid hormone production by pig blastocysts. *Nature* 245:45–47
401. **Torres M, Stoykova A, Huber O, Chowdhury K, Bonaldo P, Mansouri A, Butz S, Kemler R, Gruss P** 1997 An  $\alpha$ -E-catenin gene trap mutation defines its function in preimplantation development. *Proc Natl Acad Sci USA* 94:901–906
402. **Christiansen W, Voland JR, Wu Y, Ngo K, Roland BL, Nguyen S, Peterson PA, Fung L** 2000 Functional loss of ABCA1 in mice causes severe placental malformation, aberrant lipid distribution, and kidney glomerulonephritis as well as high-density lipoprotein cholesterol deficiency. *Am J Pathol* 157:1017–1029
403. **Feldman B, Poueymirou W, Papaioannou VE, DeChiara TM, Goldfarb M** 1995 Requirement of FGF-4 for postimplantation mouse development. *Science* 267:246–249
404. **Xiao X, Zuo X, Davis AA, McMillan DR, Curry BB, Richardson**



- JA, Benjamin IJ 1999 HSF1 is required for extra-embryonic development, postnatal growth and protection during inflammatory responses in mice. *EMBO J* 18:5943–5952
405. Christians E, Davis AA, Thomas SD, Benjamin IJ 2000 Maternal effect of Hsf1 on reproductive success. *Nature* 407:693–694
406. Tong ZB, Gold L, Pfeifer KE, Dorward H, Lee E, Bondy CA, Dean J, Nelson LM 2000 Mater, a maternal effect gene required for early embryonic development in mice. *Nat Genet* 26:267–268
407. Burns KH, Viveiros MM, Ren Y, Wang P, DeMayo FJ, Frail DE, Eppig JJ, Matzuk MM 2003 Roles of NPM2 in chromatin and nucleolar organization in oocytes and embryos. *Science* 300:633–636
408. Yuan L, Liu JG, Hoja MR, Wilbertz J, Nordqvist K, Hoog C 2002 Female germ cell aneuploidy and embryo death in mice lacking the meiosis-specific protein SCP3. *Science* 296:1115–1118
409. Shindo T, Kurihara H, Kuno K, Yokoyama H, Wada T, Kurihara Y, Imai T, Wang Y, Ogata M, Nishimatsu H, Moriyama N, Ohhashi Y, Morita H, Ishikawa T, Nagai R, Yazaki Y, Matsushima K 2000 ADAMTS-1: a metalloproteinase-disintegrin essential for normal growth, fertility, and organ morphology and function. *J Clin Invest* 105:1345–1352
410. Terasawa Y, Ladha Z, Leonard SW, Morrow JD, Newland D, Sanan D, Packer L, Traber MG, Farese RV 2000 Increased atherosclerosis in hyperlipidemic mice deficient in  $\alpha$ -tocopherol transfer protein and vitamin E. *Proc Natl Acad Sci USA* 97:13830–13834
411. Kuno N, Kadomatsu K, Fan QW, Hagihara M, Senda T, Mizutani S, Muramatsu T 1998 Female sterility in mice lacking the basigin gene, which encodes a transmembrane glycoprotein belonging to the immunoglobulin superfamily. *FEBS Lett* 425:191–194
412. Igakura T, Kadomatsu K, Kaname T, Muramatsu H, Fan QW, Miyauchi T, Toyama Y, Kuno N, Yuasa S, Takahashi M, Senda T, Taguchi O, Yamamura K, Arimura K, Muramatsu T 1998 A null mutation in basigin, an immunoglobulin superfamily member, indicates its important roles in peri-implantation development and spermatogenesis. *Dev Biol* 194:152–165
413. Fowler KJ, Hudson DF, Salamonsen LA, Edmondson SR, Earle E, Sibson MC, Choo KH 2000 Uterine dysfunction and genetic modifiers in centromere protein B-deficient mice. *Genome Res* 10:30–41
414. Cohen PE, Zhu L, Pollard JW 1997 Absence of colony stimulating factor-1 in osteopetrotic (csfmop/csfmop) mice disrupts estrous cycles and ovulation. *Biol Reprod* 56:110–118
415. Hess RA, Bunick D, Lee KH, Bahr J, Taylor JA, Korach KS, Lubahn DB 1997 A role for oestrogens in the male reproductive system. *Nature* 390:509–512
416. Ogawa S, Eng V, Taylor J, Lubahn DB, Korach KS, Pfaff DW 1998 Roles of estrogen receptor- $\alpha$  gene expression in reproduction-related behaviors in female mice. *Endocrinology* 139:5070–5081
417. Ogawa S, Lubahn DB, Korach KS, Pfaff DW 1997 Behavioral effects of estrogen receptor gene disruption in male mice. *Proc Natl Acad Sci USA* 94:1476–1481
418. Satokata I, Benson G, Maas R 1995 Sexually dimorphic sterility phenotypes in Hoxa10-deficient mice. *Nature* 374:460–463
419. Panda DK, Miao D, Tremblay ML, Sirois J, Farookhi R, Hendy GN, Goltzman D 2001 Targeted ablation of the 25-hydroxyvitamin D 1 $\alpha$ -hydroxylase enzyme: evidence for skeletal, reproductive, and immune dysfunction. *Proc Natl Acad Sci USA* 98:7498–7503
420. Baker J, Hardy MP, Zhou J, Bondy C, Lupu F, Bellve AR, Efstratiadis A 1996 Effects of an Igf1 gene null mutation on mouse reproduction. *Mol Endocrinol* 10:903–918
421. Smith CL, DeVera DG, Lamb DJ, Nawaz Z, Jiang YH, Beaudet AL, O'Malley BW 2002 Genetic ablation of the steroid receptor coactivator-ubiquitin ligase, E6-AP, results in tissue-selective steroid hormone resistance and defects in reproduction. *Mol Cell Biol* 22:525–535
422. Parr BA, McMahon AP 1998 Sexually dimorphic development of the mammalian reproductive tract requires Wnt-7a. *Nature* 395:707–710

*Endocrine Reviews* is published bimonthly by The Endocrine Society (<http://www.endo-society.org>), the foremost professional society serving the endocrine community.
